# Supplementary material for: (+)-Camphor-mediated kinetic resolution of allylalanes: a strategy towards enantio-enriched cyclohex-2-en-1-ylalane
Source: Royal Society of Chemistry journal article supplement (doi:10.1039/c6cc08649g), 2016-11-14

# (+)-Camphor- Mediated Kinetic Resolution of Allylalanines: A Strategy Towards Enantio-Enriched Cyclohex-2-en-1-ylalane

Michaël Coffinet, Fabien Massicot, Jomy Joseph, Jean-Bernard Behr, Florian Jaroschik, and Jean-Luc Vasse<sup>[\*]</sup>

Institut de Chimie Moléculaire de Reims, CNRS (UMR 7312)  
Université de Reims, 51687 Reims Cedex 2, France.

## Electronic Supporting Information

p. 2-11 : Experimental procedures and characterization of compounds

p. 13-38 : <sup>1</sup>H NMR and <sup>13</sup>C NMR spectra of new compounds

p. 39-56: HPLC of compounds **3** and **5**

p. 57 : ORTEP diagram of **1''b**

## Experimental procedures and characterization of compounds.

All reactions involving organometallics were conducted under an atmosphere of argon.

$^1\text{H}$  and  $^{13}\text{C}$  NMR spectra were recorded in  $\text{CDCl}_3$ , on a Bruker AC-250, coupling constant ( $J$ ) values are reported in Hz.

Mass spectra were recorded on a Micromass Q-TOF micro MS spectrometer.

X-ray diffraction measurement was performed on a Bruker D8 Venture diffractometer equipped with a kappa goniometer and a PHOTON100 CMOS detector and using Cu K $\alpha$  radiation (from a microsource tube with multi-layer mirror focalizing opticals). Data were collected using Bruker Apex2 software, on the full sphere, with omega and phi scans,  $1^\circ/\text{frame}$ , 25 s/frame, with the detector placed at 35mm. The sample temperature was maintained at 100K using a Cryostream700 (Oxford Cryosystems).

### (1S,2S,4R)-2-[(R)-Cyclohex-2-en-1-yl]-1,7,7-trimethylbicyclo[2.2.1]heptan-2-ol **1b**

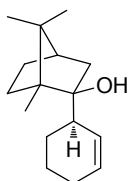

To a solution of  $\text{Cp}_2\text{TiCl}_2$  (50 mg, 0.2 mmol) and 1,3-cyclohexadiene (0.4 mL) in THF (5 mL), was slowly added a solution of DIBAL-H (1 M in THF, 2.2 mL, 2.2 mmol) at rt. The resulting mixture was stirred for 4 h at  $40^\circ\text{C}$ , then cooled down to  $-30^\circ\text{C}$ . A solution of (+)-camphor (152 mg, 1 mmol) in THF (1 mL) was added. The resulting mixture was stirred for 2 h at  $-30^\circ\text{C}$ ; then, an aqueous solution of NaOH (10%, 5 mL) was added. After 2 h of stirring, the organic layer was collected, the aqueous phase was extracted with  $\text{Et}_2\text{O}$  (2 x 5 mL), the organic phases were combined, washed with brine (5 mL) dried over  $\text{Na}_2\text{SO}_4$ , filtered and concentrated. The residue was purified by column chromatography on silica gel eluting with a mixture of PE and AcOEt to give **1b** (192 mg, 82%) as a colorless oil.  $[\alpha]_D = +15.3$  (c 1,  $\text{CH}_2\text{Cl}_2$ );  $^1\text{H}$  NMR (250 MHz,  $\text{CDCl}_3$ )  $\delta$  : 5.96 (dt,  $J = 10.5, 3.3$  Hz, 1 H), 5.67 (d,  $J = 10.2$  Hz, 1 H), 2.34 (m, 1 H), 2.07-1.66 (m, 7 H), 1.58-1.39 (m, 6 H), 1.09-1.01 (m, 4 H), 0.94 (s, 3 H), 0.83 (s, 3 H);  $^{13}\text{C}$  NMR (62.5 MHz,  $\text{CDCl}_3$ )  $\delta$  : 132.1, 128.1, 81.4, 52.1, 50.4, 46.9, 44.6, 29.7, 27.6, 25.4, 25.0, 22.0, 21.4, 20.8, 12.3; HRMS-ESI :  $m/z$   $[\text{M}+\text{Na}]^+$  calcd for  $\text{C}_{16}\text{H}_{26}\text{ONa}$ : 257.1881; found: 257.1886.

**(1S,2S,4R)-2-Cyclohexyl-1,7,7-trimethylbicyclo[2.2.1]heptan-2-ol 1'b**

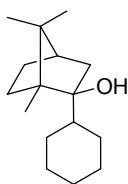

A mixture of **1b** (185 mg, 0.79 mmol) and Pd/C (10%, 30 mg) in EtOH (5 mL) was stirred under an atmosphere of H<sub>2</sub> for 1 h. The resulting mixture was filtrated through a plug of celite. The filtrate was concentrated to give **1'b** (183 mg, 98%) as pale yellow solid. Mp 58°C; [ $\alpha$ ]<sub>D</sub> = +16.7 (c 1, CH<sub>2</sub>Cl<sub>2</sub>); <sup>1</sup>H NMR (250 MHz, CDCl<sub>3</sub>)  $\delta$  : 1.93-1.60 (m, 8 H), 1.50-1.14 (m, 10 H), 1.09-1.01 (m, 4 H), 0.93 (s, 3 H), 0.82 (s, 3 H); <sup>13</sup>C NMR (62.5 MHz, CDCl<sub>3</sub>)  $\delta$  : 82.3, 52.2, 50.4, 48.3, 46.4, 44.4, 29.2, 28.4, 27.7, 27.6, 26.9, 26.5, 26.4, 21.3, 20.9, 12.4.

**(1R,2S,3R)-3-[(1S,2S,4R)-2-hydroxy-1,7,7-trimethylbicyclo[2.2.1]heptan-2-yl]cyclohexane-1,2-diol**

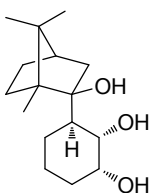

To a solution of **1b** (204 mg, 0.87 mmol) in a 10:1 mixture of acetone/water (17 mL) was added a solution of OsO<sub>4</sub> (4% in H<sub>2</sub>O, 0.4 mL) and NMO (205, mg, 1.75 mmol) and the resulting mixture was stirred at rt for 24 h. Sodium bisulfite (200 mg) was added and the stirring was continued for 1 h. The solid was filtered off. The filtrate was diluted with CH<sub>2</sub>Cl<sub>2</sub> (20 mL), the aqueous layer was discarded, and the organic phase was dried over Na<sub>2</sub>SO<sub>4</sub>, filtered and concentrated. The residue was purified by column chromatography on silica gel eluting with a 1:1 mixture of PE and AcOEt to give the triol (193 mg, 83%) as a colorless oil. <sup>1</sup>H NMR (250 MHz, CDCl<sub>3</sub>)  $\delta$  : 4.07 (m, 1 H), 3.79 (dd, *J* = 9.4, 2.3Hz, 1 H), 2.47 (br s, 3 H), 2.03-1.36 (m, 13 H), 1.13 (m, 1 H), 1.07 (s, 3 H), 0.96 (s, 3 H), 0.82 (s, 3 H); <sup>13</sup>C NMR (62.5 MHz, CDCl<sub>3</sub>)  $\delta$  : 82.1, 74.3, 71.2, 53.1, 49.9, 48.1, 44.6, 30.8, 28.9, 27.8, 27.4, 21.4, 20.8, 20.0, 12.5; HRMS-ESI : *m/z* [M+Na]<sup>+</sup> calcd for C<sub>16</sub>H<sub>28</sub>O<sub>3</sub>Na: 291.1936; found: 291.1930.

**(1R,2S,3R)-3-[(1S,2S,4R)-2-Hydroxy-1,7,7-trimethylbicyclo[2.2.1]heptan-2-yl]cyclohexane-1,2-diyl bis(4-nitrobenzoate) 1''c**

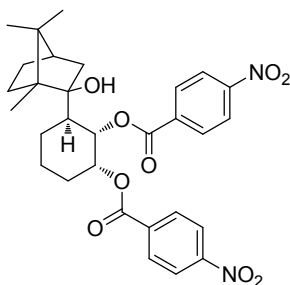

To a solution of the above triol (113 mg, 0.42 mmol) in pyridine (2 mL) was added 4-nitrobenzoyl chloride (175 mg, 0.94 mmol) and DMAP (25 mg, 0.2 mmol) and the resulting mixture was stirred for 24 h at rt. The reaction mixture was diluted with CH<sub>2</sub>Cl<sub>2</sub> (10 mL) washed with an aqueous solution of HCl (1 M, 3 x 2 mL) dried with Na<sub>2</sub>SO<sub>4</sub>, filtered and concentrated. The residue was purified by column chromatography on silica gel eluting with a 7:1 mixture of PE and AcOEt to give **1''c** (152 mg, 64%) as a white solid which was allowed to crystallized from a mixture of Et<sub>2</sub>O and AcOEt. Mp 140°C; [α]<sub>D</sub> = -151 (c 1, CH<sub>2</sub>Cl<sub>2</sub>); <sup>1</sup>H NMR (250 MHz, CDCl<sub>3</sub>) δ : 8.34 (d, *J* = 8.8 Hz, 2 H), 8.25 (d, *J* = 8.9 Hz, 2 H), 8.19 (d, *J* = 8.9 Hz, 2 H), 8.10 (d, *J* = 8.9 Hz, 2 H), 5.77 (dt, *J* = 5.4, 2.8 Hz, 1 H), 5.65 (dd, *J* = 9.1, 2.8 Hz, 1 H), 2.34 (dt, *J* = 9.9, 4.8 Hz, 1 H), 2.11 (m, 1 H), 1.93-1.46 (m, 12 H), 1.08 (m, 1 H), 1.03 (s, 3 H), 1.00 (s, 3 H), 0.83 (s, 3 H); <sup>13</sup>C NMR (62.5 MHz, CDCl<sub>3</sub>) δ : 164.2, 163.9, 150.6, 150.6, 135.7, 135.5, 130.8, 130.5, 123.8, 123.6, 80.9, 75.6, 73.4, 53.3, 50.0, 49.6, 48.2, 44.4, 29.2, 28.6, 27.8, 27.0, 21.3, 20.8, 20.3, 12.5; HRMS-ESI : *m/z* [M+Na]<sup>+</sup>calcd for C<sub>30</sub>H<sub>34</sub>N<sub>2</sub>O<sub>9</sub>Na: 589.2162; found: 589.2166.

**General procedure for the synthesis of alcohols 2 (GP1).**

To a solution of Cp<sub>2</sub>TiCl<sub>2</sub> (50 mg, 0.2 mmol) and 1,3-cyclohexadiene (0.3 mL) in THF (5 mL) under argon, was slowly added a solution of DIBAL-H (1 M in THF, 2 mL, 2 mmol) at rt. The resulting mixture was stirred for 4 h at 40°C, then cooled down to -30°C. A solution of (+)-camphor (152 mg, 1 mmol) in THF (1 mL) was slowly added. The resulting mixture was stirred for 2 h at -30°C, then, a solution of aldehyde (0.8 mmol) in THF (1 mL) was added. The reaction was quenched after 2 h of stirring by adding an aqueous solution of NaOH (10%, 5 mL). After 2 h of stirring, the organic layer was collected and the aqueous phase was extracted with Et<sub>2</sub>O (2 x 5 mL). The organic phases were combined, washed with brine (5 mL), dried over Na<sub>2</sub>SO<sub>4</sub>, filtered and concentrated. The residue was purified by column chromatography on silica gel, eluting with a mixture of PE and AcOEt, to give **2**.

**(R)-[(S)-Cyclopent-2-en-1-yl](phenyl)methanol 4a<sup>1</sup>**

<sup>1</sup> Y. Sasaki, C. Zhong, M. Sawamura, H. Ito, *J. Am. Chem. Soc.* **2010**, *132*, 1226-1227

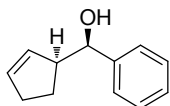

Yield = 85%. Colorless oil; ee = 48%,  $[\alpha]_D = -15.1$  (c 1,  $\text{CH}_2\text{Cl}_2$ );  $^1\text{H NMR}$  (250 MHz,  $\text{CDCl}_3$ )  $\delta$  : 7.35-7.25 (m, 5 H), 5.84 (m, 1 H), 5.38 (m, 1 H), 4.56 (d,  $J = 6.5$  Hz, 1 H), 3.09 (m, 1 H), 2.43-2.23 (m, 2 H), 2.01-1.77 (m, 3 H);  $^{13}\text{C NMR}$  (62.5 MHz,  $\text{CDCl}_3$ )  $\delta$  : 143.4, 133.6, 131.2, 128.2, 127.3, 126.3, 76.9, 53.9, 32.2, 25.0.

**(R)-[(S)-Cyclohex-2-en-1-yl](phenyl)methanol 3a<sup>2</sup>**

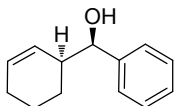

Yield = 85%. Colorless oil; ee = 89%;  $[\alpha]_D = -9.1$  (c 1,  $\text{CH}_2\text{Cl}_2$ );  $^1\text{H NMR}$  (250 MHz,  $\text{CDCl}_3$ )  $\delta$  : 7.40-7.30 (m, 5 H), 5.82 (dq,  $J = 10.1, 3.4$  Hz, 1 H), 5.47 (dt,  $J = 10.6, 2.6$  Hz, 1 H), 4.53 (d,  $J = 6.6$  Hz, 1 H), 2.44 (m, 1 H), 2.05-1.89 (m, 3 H), 1.84-1.71 (m, 2 H), 1.55-1.44 (m, 2 H);  $^{13}\text{C NMR}$  (62.5 MHz,  $\text{CDCl}_3$ )  $\delta$  : 142.9, 130.3, 128.2, 128.0, 127.3, 126.5, 77.3, 42.9, 25.2, 23.8, 21.1.

**(R)-(4-Bromophenyl) [(S)-cyclohex-2-en-1-yl]methanol 3b<sup>3</sup>**

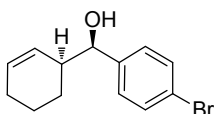

Yield = 89%. Colorless oil; ee = 84%;  $[\alpha]_D = -7.1$  (c 1,  $\text{CH}_2\text{Cl}_2$ );  $^1\text{H NMR}$  (250 MHz,  $\text{CDCl}_3$ )  $\delta$  : 7.45 (d,  $J = 8.4$  Hz, 2 H), 7.22 (d,  $J = 8.3$  Hz, 2 H), 5.83 (dq,  $J = 10.0, 3.4$  Hz, 1 H), 5.36 (dt,  $J = 10.2, 2.4$  Hz, 1 H), 4.54 (d,  $J = 6.2$  Hz, 1 H), 2.44 (m, 1 H), 2.06-1.92 (m, 3 H), 1.83-1.38 (m, 4 H);  $^{13}\text{C NMR}$  (62.5 MHz,  $\text{CDCl}_3$ )  $\delta$  : 141.7, 131.2, 130.8, 128.2, 128.0, 127.5, 121.0, 76.6, 42.9, 25.1, 23.5, 21.0.

**(R)- [(S)-Cyclohex-2-en-1-yl](3,4-dichlorophenyl)methanol 3c**

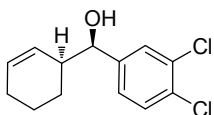

Yield = 55%. Colorless oil; ee = 87%;  $[\alpha]_D = -8.3$  (c 0.9,  $\text{CH}_2\text{Cl}_2$ );  $^1\text{H NMR}$  (250 MHz,  $\text{CDCl}_3$ )  $\delta$  : 7.44 (d,  $J = 1.4$  Hz, 1 H), 7.40 (d,  $J = 8.2$  Hz, 1 H), 7.15 (dd,  $J = 8.3, 2.1$  Hz, 1 H), 5.87 (dq,  $J = 10.0, 3.4$  Hz, 1 H), 5.39 (dd,  $J = 9.7, 3.1$  Hz, 1 H), 4.58 (d,  $J = 5.8$  Hz, 1 H), 2.45 (m, 1 H), 2.11-1.92 (m, 3 H), 1.83-1.39 (m, 4 H);  $^{13}\text{C NMR}$  (62.5 MHz,  $\text{CDCl}_3$ )  $\delta$  :

<sup>2</sup> Y. Yoshimura, M. Ohta, T. Imahori, T. Imamichi, H. Takahata, *Org. Lett.* **2008**, *10*, 3449-3452.

<sup>3</sup> A. Flahaut, K. Toutah, P. Mangeney, S. Rolan, *Eur. J. Inorg. Chem.* **2009**, 5422-5432.

143.0, 132.2, 131.4, 131.0, 130.0, 128.4, 128.2, 127.2, 125.7, 75.9, 42.9, 25.1, 23.2, 21.0;  
HRMS-ESI :  $m/z$  [M]<sup>-</sup> calcd for C<sub>13</sub>H<sub>13</sub>Cl<sub>2</sub>O: 255.0343; found: 255.0340.

**(R)-(6-Bromobenzo[d][1,3]dioxol-5-yl)[(S)-cyclohex-2-en-1-yl]methanol 3d**

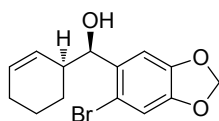

Yield = 82%. Colorless oil; ee = 84%;  $[\alpha]_D = -21.1$  (c 1, Et<sub>2</sub>O); <sup>1</sup>H NMR (250 MHz, CDCl<sub>3</sub>) δ : 7.02 (s, 1 H), 6.94 (s, 1 H), 5.96 (s, 2 H), 5.86 (dt,  $J = 10.2, 3.4$  Hz, 1 H), 5.45 (m, 1 H), 4.93 (d,  $J = 5.4$  Hz, 1 H), 2.56 (m, 1 H), 2.19 (br s, 1 H), 2.04-1.93 (m, 2 H), 1.76 (m, 1 H), 1.58-1.43 (m, 3 H); <sup>13</sup>C NMR (62.5 MHz, CDCl<sub>3</sub>) δ : 147.3, 134.9, 130.8, 127.8, 112.4, 112.2, 108.2, 101.6, 75.2, 41.0, 25.1, 23.0, 21.2; HRMS-ESI :  $m/z$  [M+Na]<sup>+</sup> calcd for C<sub>14</sub>H<sub>15</sub>BrO<sub>3</sub>Na: 333.0102; found: 333.0106.

**Methyl 4-[(R)-[(S)-cyclohex-2-en-1-yl](hydroxymethyl)]benzoate 3e<sup>4</sup>**

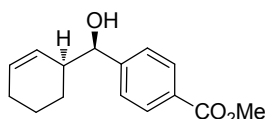

Yield = 75%. White solid; mp 62°C; ee = 87%;  $[\alpha]_D = -7.0$  (c 1, CH<sub>2</sub>Cl<sub>2</sub>); <sup>1</sup>H NMR (250 MHz, CDCl<sub>3</sub>) δ : 8.02 (d,  $J = 8.2$  Hz, 2 H), 7.42 (d,  $J = 8.1$  Hz, 2 H), 5.93-5.77 (m, 1 H), 5.41 (d,  $J = 10.0$  Hz, 1 H), 4.70 (d,  $J = 5.8$  Hz, 1 H), 3.91 (s, 3 H), 2.51 (m, 1 H), 2.03-1.94 (m, 2 H), 1.88 (br s, 1 H), 1.63 (m, 1 H), 1.62-1.44 (d,  $J = 7.8$  Hz, 3 H); <sup>13</sup>C NMR (62.5 MHz, CDCl<sub>3</sub>) δ : 147.9, 131.2, 129.5, 129.1, 127.5, 126.4, 76.7, 52.05, 43.0, 25.1, 23.3, 21.0, 1 C is missing.

**(R)- [(S)-Cyclohex-2-en-1-yl](pyridin-3-yl)methanol 3f**

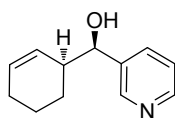

Yield = 50%. Colorless oil; ee = 88%;  $[\alpha]_D = -7.5$  (c 1, CH<sub>2</sub>Cl<sub>2</sub>); <sup>1</sup>H NMR (250 MHz, CDCl<sub>3</sub>) δ : 8.57-8.20 (m, 2 H), 7.71 (d,  $J = 7.9$  Hz, 1 H), 7.20 (m, 1 H), 5.83 (dq,  $J = 9.8, 3.3$  Hz, 1 H), 5.39 (dd,  $J = 9.9, 2.8$  Hz, 1 H), 4.63 (d,  $J = 6.3$  Hz, 1 H), 3.21 (s, 1 H), 2.50 (m, 1 H), 2.02-1.92 (m, 2 H), 1.78-1.42 (m, 4 H); <sup>13</sup>C NMR (62.5 MHz, CDCl<sub>3</sub>) δ : 148.0, 134.5, 130.7, 129.9, 127.2, 126.7, 74.7, 42.8, 42.7, 25.1, 23.7, 20.9; HRMS-ESI :  $m/z$  [M+H]<sup>+</sup> calcd for C<sub>12</sub>H<sub>16</sub>NO: 190.1232; found: 190.1235.

**(R)- [(S)-Cyclohex-2-en-1-yl](furan-3-yl)methanol 3g**

<sup>4</sup> G. P. Howell, A. J. Minnaard, B. L. Feringa, *Org. Biomol. Chem.* **2006**, *4*, 1278-1283.

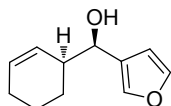

Yield = 83%. Colorless oil; ee = 87%;  $[\alpha]_D = -39.6$  (c 1, Et<sub>2</sub>O); <sup>1</sup>H NMR (250 MHz, CDCl<sub>3</sub>) δ : 7.38 (s, 2 H), 6.39 (s, 1 H), 5.81 (m, 1 H), 5.47 (d, *J* = 9.8 Hz, 1 H), 4.53 (d, *J* = 6.6 Hz, 1 H), 2.44 (m, 1 H), 2.04-1.93 (m, 3 H), 1.84-1.72 (m, 2 H), 1.57-1.42 (m, 2 H); <sup>13</sup>C NMR (62.5 MHz, CDCl<sub>3</sub>) δ : 143.0, 139.7, 130.2, 127.7, 127.2, 108.8, 70.2, 41.9, 25.1, 24.1, 21.1; HRMS-ESI : *m/z* [M+Na]<sup>+</sup> calcd for C<sub>11</sub>H<sub>14</sub>O<sub>2</sub>Na: 201.0891; found: 201.0899.

### (R)-1-[(S)-Cyclohex-2-en-1-yl](1H-indol-2-yl)methanol 3h

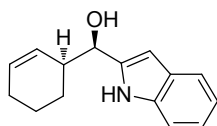

Yield = 64%. White solid; mp 129°C; ee = 84%;  $[\alpha]_D = -46$  (c 0.4, CH<sub>2</sub>Cl<sub>2</sub>); <sup>1</sup>H NMR (250 MHz, CDCl<sub>3</sub>) δ : 8.41 (s, 1 H), 7.56 (d, *J* = 7.6 Hz, 1 H), 7.32 (d, *J* = 7.8 Hz, 1 H), 7.21-7.02 (m, 2 H), 6.35 (m, 1 H), 5.87 (dq, *J* = 9.9, 3.3 Hz, 1 H), 5.51 (m, 1 H), 4.79 (d, *J* = 6.3 Hz, 1 H), 2.62 (m, 1 H), 2.16 (br s, 1 H), 2.03-1.45 (m, 6 H); <sup>13</sup>C NMR (62.5 MHz, CDCl<sub>3</sub>) δ : 139.5, 135.6, 130.9, 130.6, 128.1, 127.2, 127.2, 121.2, 120.3, 119.7, 110.9, 99.7, 71.8, 67.9, 41.9, 25.1, 24.2, 21.0; HRMS-ESI : *m/z* [M+Na]<sup>+</sup> calcd for C<sub>15</sub>H<sub>17</sub>NONa: 250.1208; found: 250.1203.

### (S,E)-1-[(S)-Cyclohex-2-en-1-yl]-3-phenylprop-2-en-1-ol 3i<sup>5</sup>

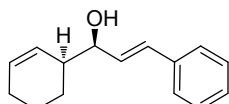

Yield = 80%. Colorless oil; ee = 87%;  $[\alpha]_D = -81$  (c 1, CH<sub>2</sub>Cl<sub>2</sub>); <sup>1</sup>H NMR (250 MHz, CDCl<sub>3</sub>) δ : 7.45-7.15 (m, 5 H), 6.58 (d, *J* = 16.0 Hz, 1 H), 6.23 (dd, *J* = 15.9, 6.9 Hz, 1 H), 5.84 (dq, *J* = 10.1, 3.3 Hz, 1 H), 5.64 (d, *J* = 10.1 Hz, 1 H), 4.18 (t, *J* = 6.4 Hz, 1 H), 2.36 (m, 1 H), 2.06-1.93 (m, 2 H), 1.80 (m, 3 H), 1.62-1.39 (m, 2 H); <sup>13</sup>C NMR (62.5 MHz, CDCl<sub>3</sub>) δ : 136.7, 131.4, 130.5, 130.1, 128.5, 127.60, 127.6, 126.4, 76.0, 41.8, 25.2, 24.1, 21.2.

### (R)-1-[(S)-Cyclohex-2-en-1-yl]-2,2-diphenylethanol 3j

<sup>5</sup> E. González, L. Muñoz-Hernández, E. Alicea, B. Singaram, G. W. Kabalka, J. A. Soderquist, *Org. Lett.* **2015**, *17*, 4368-4371.

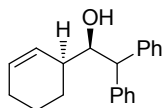

Yield = 58%. Pale yellow solid; mp 58°C; ee = 82%;  $[\alpha]_D = +2.1$  (c 1, CH<sub>2</sub>Cl<sub>2</sub>); <sup>1</sup>H NMR (250 MHz, CDCl<sub>3</sub>) δ : 7.61-7.05 (m, 10 H), 5.91 (dq, *J* = 10.1, 3.1 Hz, 1 H), 5.68-5.51 (d, *J* = 10.1 Hz, 1 H), 4.44 (dd, *J* = 9.2, 3.7 Hz, 1 H), 4.12 (d, *J* = 9.2 Hz, 1H), 2.26 (m, 1 H), 2.07-1.96 (m, 2 H), 1.88-1.67 (m, 3 H), 1.60 (br s, 1 H), 1.44 (m, 1 H); <sup>13</sup>C NMR (62.5 MHz, CDCl<sub>3</sub>) δ : 142.2, 141.8, 130.4, 129.4, 128.6 (3 C), 128.1, 126.6, 126.5, 76.3, 54.8, 37.9, 25.0, 21.4, 21.3; HRMS-ESI : *m/z* [M+Na]<sup>+</sup> calcd for C<sub>20</sub>H<sub>22</sub>ONa 301.1568; found: 301.1565.

**(S)-4-[(Tert-Butyldimethylsilyloxy)-1-[(S)-cyclohex-2-en-1-yl]butan-1-ol 3k**

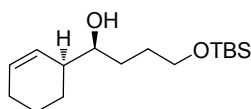

Yield = 66%. Colorless oil; ee = 89%;  $[\alpha]_D = -31.9$  (c 1, CH<sub>2</sub>Cl<sub>2</sub>); <sup>1</sup>H NMR (250 MHz, CDCl<sub>3</sub>) δ : 5.83 (dq, *J* = 9.9, 3.2 Hz, 1 H), 5.58 (d, *J* = 8.5 Hz, 1 H), 3.67 (t, *J* = 5.2 Hz, 2 H), 3.55 (m, 1 H), 2.35 (s, 1 H), 2.22 (s, 1 H), 1.99 (m, 2 H), 1.81-1.43 (m, 8 H), 0.90 (s, 9 H), 0.07 (s, 6 H); <sup>13</sup>C NMR (62.5 MHz, CDCl<sub>3</sub>) δ : 129.8, 128.8, 74.2, 63.4, 41.3, 30.9, 29.4, 25.9, 23.2, 21.4, 18.3, -5.4, -5.4; HRMS-ESI : *m/z* [M+Na]<sup>+</sup> calcd for C<sub>16</sub>H<sub>32</sub>O<sub>2</sub>SiNa 307.2069; found: 307.2077.

**(S)-1-[(S)-Cyclohex-2-en-1-yl]butane-1,4-diol**

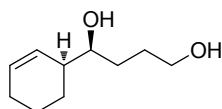

To a solution of **2ak** (104 mg, 0.37 mmol) in THF (5 mL), was added TBAF·H<sub>2</sub>O (184 mg, 0.66 mmol) and the resulting solution was stirred at rt for 2 h; then the solvent was removed under reduced pressure. The residue was diluted with Et<sub>2</sub>O (10 mL), washed with water (2 x 1 mL), dried over Na<sub>2</sub>SO<sub>4</sub>, filtered and concentrated to give the title diol as a colorless oil (53 mg, 86%). ee = 89%;  $[\alpha]_D = -36.7$  (c 1, CH<sub>2</sub>Cl<sub>2</sub>); <sup>1</sup>H NMR (250 MHz, CDCl<sub>3</sub>) δ : 5.86 (m, 1 H), 5.56 (d, *J* = 8.5 Hz, 1 H), 3.75-3.54 (m, 3 H), 2.69 (m, 2 H), 2.23 (m, 1 H), 1.99 (br s, 2 H), 1.83-1.41 (m, 8 H); <sup>13</sup>C NMR (62.5 MHz, CDCl<sub>3</sub>) δ : 130.4, 128.4, 74.6, 62.9, 41.6, 30.9, 29.7, 25.2, 23.0, 21.3; HRMS-ESI : *m/z* [M+Na]<sup>+</sup> calcd for C<sub>10</sub>H<sub>18</sub>O<sub>2</sub>Na 193.1204; found: 193.1207.

**(R)-[(S)-cyclohex-2-en-1-yl][(R)-2,2-dimethyl-1,3-dioxolan-4-yl]methanol 3l**



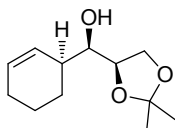

Prepared according to GP1 using (+)-camphor (152 mg, 1 mmol). Colorless oil;  $de = 86\%$ ;  $[\alpha]_D = -30.3$  (c 1,  $\text{CH}_2\text{Cl}_2$ );  $^1\text{H NMR}$  (250 MHz,  $\text{CDCl}_3$ )  $\delta$  : 5.84 (dq,  $J = 10.1, 2.2$  Hz, 1 H), 5.57 (dt,  $J = 10.0, 2.3$  Hz, 1 H), 4.22 (m, 1H), 4.03 (dd,  $J = 8.1, 6.4$  Hz, 1 H), 3.77 (t,  $J = 7.6$  Hz, 1 H), 3.44 (t,  $J = 5.7$  Hz, 1 H), 2.22 (m, 1 H), 2.08 (br s, 1 H), 2.00 (m, 2 H), 1.80-1.64 (m, 3 H), 1.56 (m, 1 H), 1.44 (s, 3 H), 1.38 (s, 3 H);  $^{13}\text{C NMR}$  (62.5 MHz,  $\text{CDCl}_3$ )  $\delta$  : 130.2, 127.5, 109.2, 76.6, 74.5, 66.4, 39.0, 26.6, 25.3, 25.0, 23.5, 20.6; HRMS-ESI :  $m/z$   $[\text{M}+\text{Na}]^+$  calcd for  $\text{C}_{12}\text{H}_{20}\text{O}_3\text{Na}$  235.1310; found: 235.1308.

**(S)-1-[(R)-cyclohex-2-en-1-yl]-(R)-2,2-dimethyl-1,3-dioxolan-4-ylmethanol 3m**

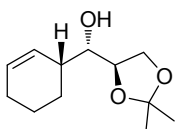

Prepared according to GP1 using (-)-camphor (152 mg, 1 mmol). Colorless oil;  $de = 88\%$ ;  $[\alpha]_D = +38.5$  (c 1,  $\text{CH}_2\text{Cl}_2$ );  $^1\text{H NMR}$  (250 MHz,  $\text{CDCl}_3$ )  $\delta$  : 5.89 (dq,  $J = 9.8, 2.5$  Hz, 1 H), 5.50 (d,  $J = 10.0$  Hz, 1 H), 4.16 (q,  $J = 6.2$  Hz, 1 H), 4.04 (t,  $J = 7.1$  Hz, 1 H), 3.95 (t,  $J = 7.5$  Hz, 1 H), 3.70 (t,  $J = 5.6$  Hz, 1 H), 2.36 (br s, 1 H), 2.08-1.86 (m, 3 H), 1.83-1.70 (m, 2 H), 1.65-1.50 (m, 2 H), 1.43 (s, 3 H), 1.37 (s, 3 H);  $^{13}\text{C NMR}$  (62.5 MHz,  $\text{CDCl}_3$ )  $\delta$  : 131.1, 127.3, 108.7, 76.2, 73.8, 65.6, 37.9, 26.6, 25.4, 25.1, 23.0, 20.8; HRMS-ESI :  $m/z$   $[\text{M}+\text{Na}]^+$  calcd for  $\text{C}_{12}\text{H}_{20}\text{O}_3\text{Na}$  235.1310; found: 235.1303.

**(R)-1-[(S)-Cyclohex-2-en-1-yl]-1-(o-tolyl)ethanol 3n**

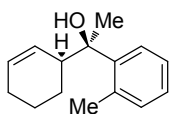

Yield = 58%. Colorless oil;  $ee = 86\%$ ;  $[\alpha]_D = +38.8$  (c 1,  $\text{CH}_2\text{Cl}_2$ );  $^1\text{H NMR}$  (250 MHz,  $\text{CDCl}_3$ )  $\delta$  : 7.52 (m, 1 H), 7.18-7.10 (m, 3 H), 5.92 (dq,  $J = 10.3, 3.5$  Hz, 1 H), 5.64 (d,  $J = 10.3$  Hz, 1 H), 2.89 (m, 1 H), 2.51 (s, 3 H), 1.97 (m, 2 H), 1.80 (br s, 1 H), 1.73 (m, 1 H), 1.64 (s, 3 H), 1.54-1.24 (m, 3 H);  $^{13}\text{C NMR}$  (62.5 MHz,  $\text{CDCl}_3$ )  $\delta$  : 144.7, 134.7, 132.4, 131.3, 126.65, 126.60, 126.55, 125.4, 77.1, 43.7, 27.0, 25.1, 24.2, 22.6, 22.0; HRMS-ESI :  $m/z$   $[\text{M}+\text{Na}]^+$  calcd for  $\text{C}_{15}\text{H}_{20}\text{ONa}$  239.1412; found: 239.1411.

**(R)-1-[(S)-cyclohex-2-en-1-yl]-1,2,3,4-tetrahydronaphthalen-1-ol 3o**

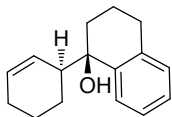

Yield = 53%. Colorless oil;  $ee = 86\%$ ;  $[\alpha]_D = -17.4$  ( $c$  0.7,  $CH_2Cl_2$ );  $^1H$  NMR (250 MHz,  $CDCl_3$ )  $\delta$  : 7.53 (dd,  $J = 7.2, 2.0$  Hz, 1H), 7.27-7.14 (m, 2H), 7.07 (d,  $J = 7.3$  Hz, 1 H), 5.63 (dq,  $J = 10.3, 3.4$  Hz, 1H), 5.00 (dt,  $J = 10.3, 2.1$  Hz, 1H), 2.91 (m, 1 H), 2.79-2.55 (m, 2 H), 2.05-1.44 (m, 12 H);  $^{13}C$  NMR (62.5 MHz,  $CDCl_3$ )  $\delta$  : 141.1, 138.1, 129.0, 128.7, 128.2, 126.9, 126.5, 126.3, 74.0, 46.3, 33.0, 30.2, 25.3, 23.4, 22.3, 19.2; HRMS-ESI :  $m/z$   $[M+Na]^+$  calcd for  $C_{16}H_{20}ONa$  251.1412; found: 251.1410.

**(R)-1-[(S)-cyclohex-2-en-1-yl]-1-phenyl-4-(trityloxy)but-2-yn-1-ol 3p**

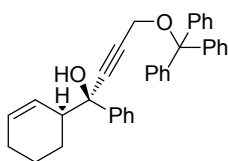

Yield = 55%. Yellow oil;  $dr$  *syn* / *anti* = 89:11,  $ee$  (*syn*) = 86%;  $^1H$  NMR (250 MHz,  $CDCl_3$ )  $\delta$  : 7.57 (d,  $J = 7.2$  Hz, 2 H), 7.48 (d,  $J = 7.4$  Hz, 6 H), 7.37 – 7.16 (m, 12 H), 5.89 (dq,  $J = 10.2, 3.3$  Hz, 1 H), 5.75 (d,  $J = 10.3$  Hz, 1 H), 3.89 (s, 2 H), 2.63 (m, 1 H), 2.31 (br s, 1 H), 1.95 (m, 2 H), 1.74 (m, 1 H), 1.63-1.34 (m, 3 H);  $^{13}C$  NMR (62.5 MHz,  $CDCl_3$ )  $\delta$  : 143.6, 142.9, 131.3, 128.6, 127.9, 127.8, 127.4, 127.1, 126.6, 126.1, 87.8, 87.6, 82.9, 75.1, 53.4, 48.1, 25.1, 23.7, 21.6; HRMS-ESI :  $m/z$   $[M+Na]^+$  calcd for  $C_{35}H_{32}O_2Na$  507.2300; found: 507.2295.

**General procedure for the palladium-mediated retroallylation / coupling reaction. Synthesis of compounds 5 (GP2).**

A dry flask was loaded with anhydrous  $Cs_2CO_3$  (279 mg, 0.85 mmol) and heated with a heat gun for 2 min under reduced pressure.  $Pd(OAc)_2$  (19 mg, 0.08 mmol) was next added and the flask was filled with argon by using the standard Schlenk technique. Tritolylphosphine (104 mg, 0.34 mmol) in toluene (1 mL) was added and the resulting mixture was stirred for 10 min. A solution of **1c** (100 mg, 0.43 mmol) and aryl bromide (0.43 mmol) in toluene (1 mL) was added and the mixture was stirred at reflux for 12 h. the mixture was cooled down to rt, then water (2 mL) and hexane (2 x 2 mL) were added. The aqueous layer was extracted with  $Et_2O$  (2 x 5 mL), the organic phases were combined, dried over  $Na_2SO_4$ , filtered and concentrated under reduced pressure. The residue was purified by column chromatography on silica gel to give **3**.

**(S)-Ethyl 1',2',3',4'-tetrahydro-[1,1'-biphenyl]-2-carboxylate 5a.**

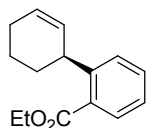

Yield = 55%; colorless oil;  $[\alpha]_D = -35$  (c 0.5,  $\text{CH}_2\text{Cl}_2$ );  $^1\text{H NMR}$  (250 MHz,  $\text{CDCl}_3$ )  $\delta$  : 7.79 (d,  $J = 7.7$  Hz, 1 H), 7.43 (dt,  $J = 7.4, 2.0$  Hz, 1 H), 7.36 (d,  $J = 7.3$  Hz, 1 H), 7.23 (td,  $J = 7.4, 2.1$  Hz, 1 H), 5.91 (dq,  $J = 10.1, 3.0$  Hz, 1 H), 5.65 (d,  $J = 10.1$  Hz, 1H), 4.36 (q,  $J = 7.0$  Hz, 2 H), 4.25 (m, 1 H), 2.22-2.04 (m, 3 H), 1.79-1.59 (m, 2 H), 1.50 (m, 1 H), 1.39 (t,  $J = 7.0$  Hz, 3 H);  $^{13}\text{C NMR}$  (62.5 MHz,  $\text{CDCl}_3$ )  $\delta$  : 168.1, 147.3, 131.5, 130.4, 130.2, 130.0, 128.9, 128.4, 125.7, 60.9, 37.9, 32.2, 25.0, 21.3, 14.2; HRMS-ESI :  $m/z$   $[\text{M}+\text{Na}]^+$  calcd for  $\text{C}_{15}\text{H}_{18}\text{O}_2\text{Na}$  253.1204; found: 253.1198.

**(S)-Ethyl 1',2',3',4'-tetrahydro-[1,1'-biphenyl]-4-carboxylate 5b**

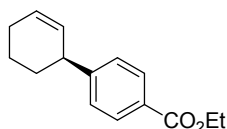

Yield = 66%; colorless oil;  $[\alpha]_D = -62.5$  (c 1,  $\text{CH}_2\text{Cl}_2$ );  $^1\text{H NMR}$  (250 MHz,  $\text{CDCl}_3$ )  $\delta$  : 8.00 (d,  $J = 8.2$  Hz, 2 H), 7.31 (d,  $J = 8.2$  Hz, 3H), 5.96 (dq,  $J = 9.8, 3.1$  Hz, 1 H), 5.72 (d,  $J = 10.0$  Hz, 1 H), 4.39 (q,  $J = 7.1$  Hz, 2 H), 3.49 (m, 1 H), 2.18-1.99 (m, 3 H), 1.84-1.53 (m, 3 H), 1.41 (t,  $J = 7.1$  Hz, 3 H);  $^{13}\text{C NMR}$  (62.5 MHz,  $\text{CDCl}_3$ )  $\delta$  : 166.7, 152.0, 129.6, 129.2, 129.0, 128.3, 127.7, 77.1, 60.7, 41.8, 24.9, 21.0, 14.3; HRMS-ESI :  $m/z$   $[\text{M}+\text{Na}]^+$  calcd for  $\text{C}_{15}\text{H}_{18}\text{O}_2\text{Na}$  253.1204; found: 253.1207.

**(S)-2-(Cyclohex-2-en-1-yl)pyridine 5c.**

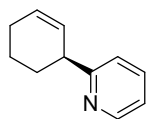

Yield = 46% ; colorless oil;  $[\alpha]_D = -64.5$  (c 0.5,  $\text{CH}_2\text{Cl}_2$ );  $^1\text{H NMR}$  (250 MHz,  $\text{CDCl}_3$ )  $\delta$  : 8.55 (d,  $J = 3.9$  Hz, 1 H), 7.61 (td,  $J = 7.7, 1.9$  Hz, 1 H),  $\delta$  7.20 (d,  $J = 7.8$  Hz, 1 H), 7.11 (m, 1 H), 5.95 (dq,  $J = 7.6, 2.3$  Hz, 1 H), 5.80 (d,  $J = 10.0$  Hz, 1 H), 3.60 (m, 1 H), 2.17-2.01 (m, 3 H), 1.81-1.61 (m, 3 H);  $^{13}\text{C NMR}$  (62.5 MHz,  $\text{CDCl}_3$ )  $\delta$  : 165.3, 149.2, 136.3, 128.8, 128.6, 121.7, 121.0, 43.9, 30.6, 24.9, 21.0; HRMS-ESI :  $m/z$   $[\text{M}+\text{H}]^+$  calcd for  $\text{C}_{11}\text{H}_{14}\text{N}$  160.1126; found: 160.1120.

**(S)-(1',2',3',4'-Tetrahydro-[1,1'-biphenyl]-2-yl)methanol 5'a**

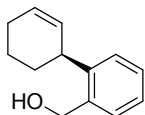

To a suspension of  $\text{LiAlH}_4$  (22 mg, 0.58 mmol) in  $\text{Et}_2\text{O}$  (2 mL) was slowly added a solution of **5c** (67 mg, 0.29 mmol) in  $\text{Et}_2\text{O}$  (2 mL) at  $0^\circ\text{C}$ , and the resulting mixture was stirred for 2 h at rt. An aqueous solution of NaOH (10%, 2 mL) was carefully added at  $0^\circ\text{C}$ . The aqueous layer was extracted with AcOEt (3 x 2 mL), the organic phases were combined, dried over  $\text{Na}_2\text{SO}_4$ , filtered and concentrated. The residue was purified by flash column chromatography to give **5'a** (45 mg, 85%) as a white solid, mp  $59^\circ\text{C}$ ;  $[\alpha]_{\text{D}} = -72$  (c 0.2,  $\text{CHCl}_3$ );  $^1\text{H NMR}$  (250 MHz,  $\text{CDCl}_3$ )  $\delta$  : 7.37 (d,  $J = 7.0$  Hz, 1 H), 7.32-7.16 (m, 3 H), 5.92 (dq,  $J = 10.0, 3.4$  Hz, 1 H), 5.65 (d,  $J = 10.2$  Hz, 1 H), 4.78 (d,  $J = 12.5$  Hz, 1 H), 4.71 (d,  $J = 12.4$  Hz, 1 H), 3.73 (m, 1 H), 2.08 (m, 3 H), 1.85-1.41 (m, 4 H);  $^{13}\text{C NMR}$  (62.5 MHz,  $\text{CDCl}_3$ )  $\delta$  : 144.7, 137.8, 130.4, 128.4, 128.2, 128.0, 126.2, 63.0, 37.2, 32.0, 24.9, 21.4; HRMS-ESI :  $m/z$   $[\text{M}+\text{Na}]^+$  calcd for  $\text{C}_{13}\text{H}_{16}\text{ONa}$  211.1099; found: 211.1096.

**(1S,2S,4R)-2-[(R)-Cyclohex-2-en-1-yl]-1,7,7-trimethylbicyclo[2.2.1]heptan-2-ol 1b**

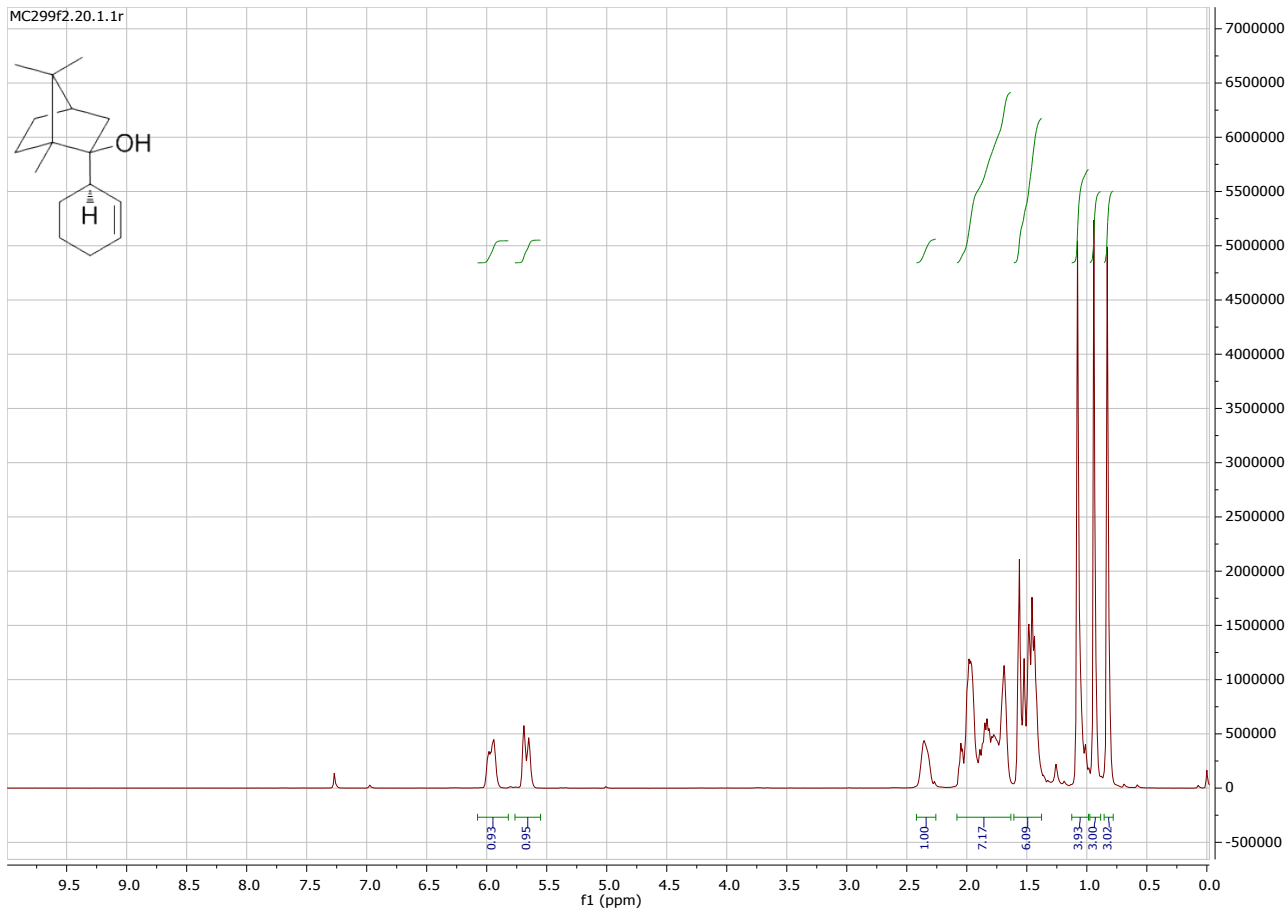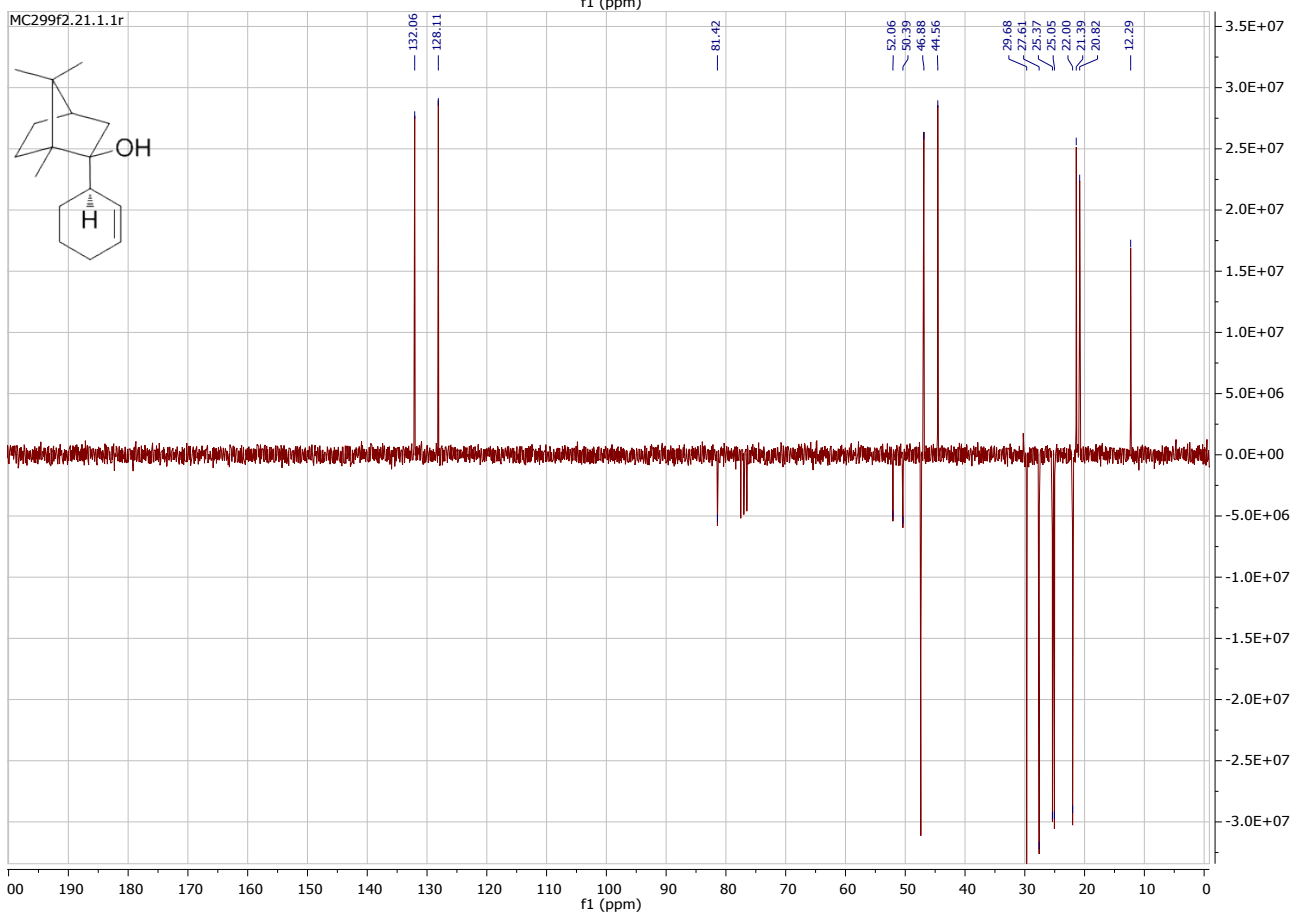

(1S,2S,4R)-2-Cyclohexyl-1,7,7-trimethylbicyclo[2.2.1]heptan-2-ol 1'b

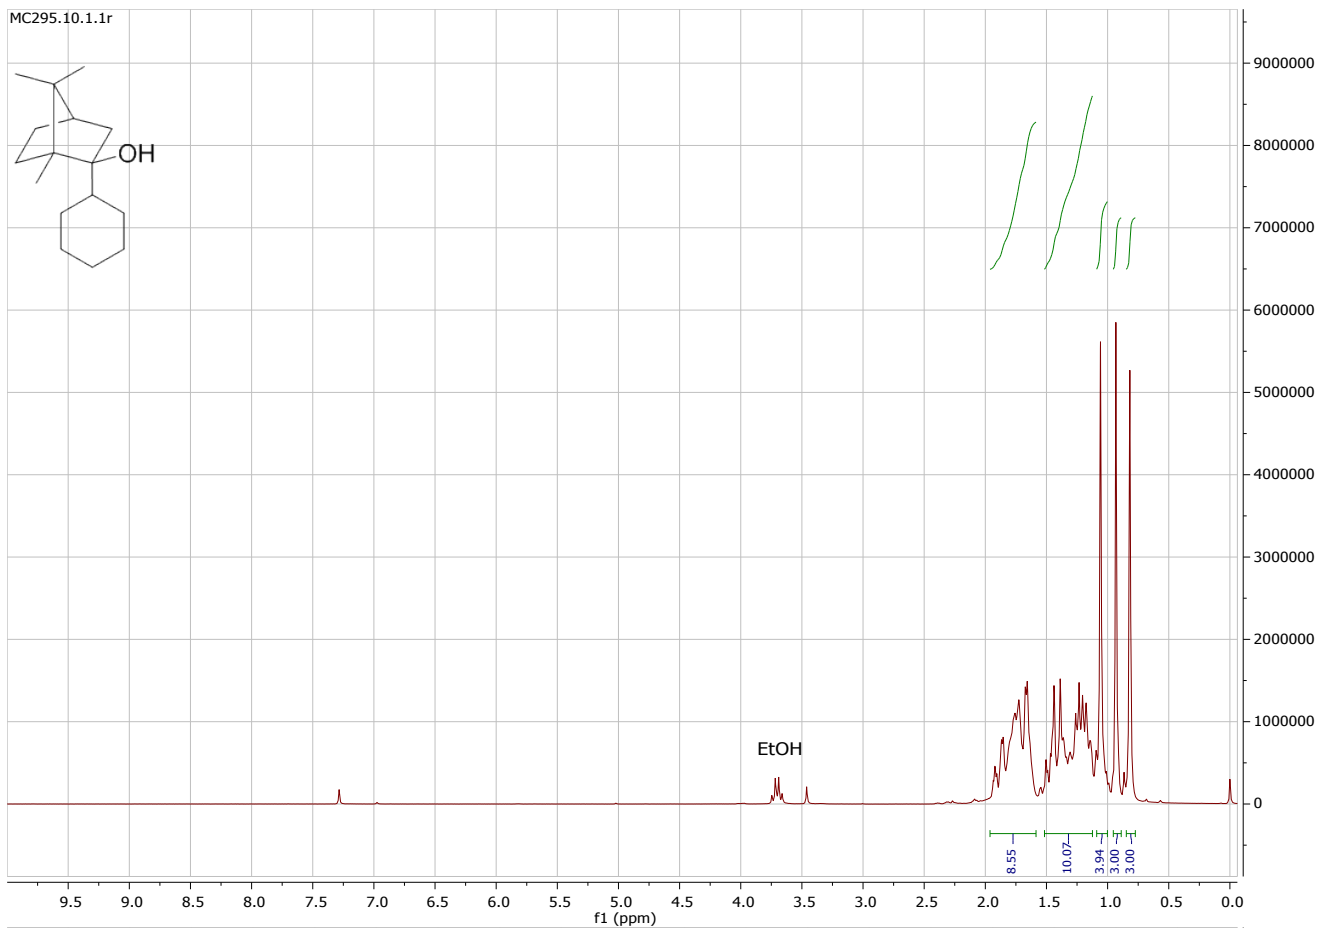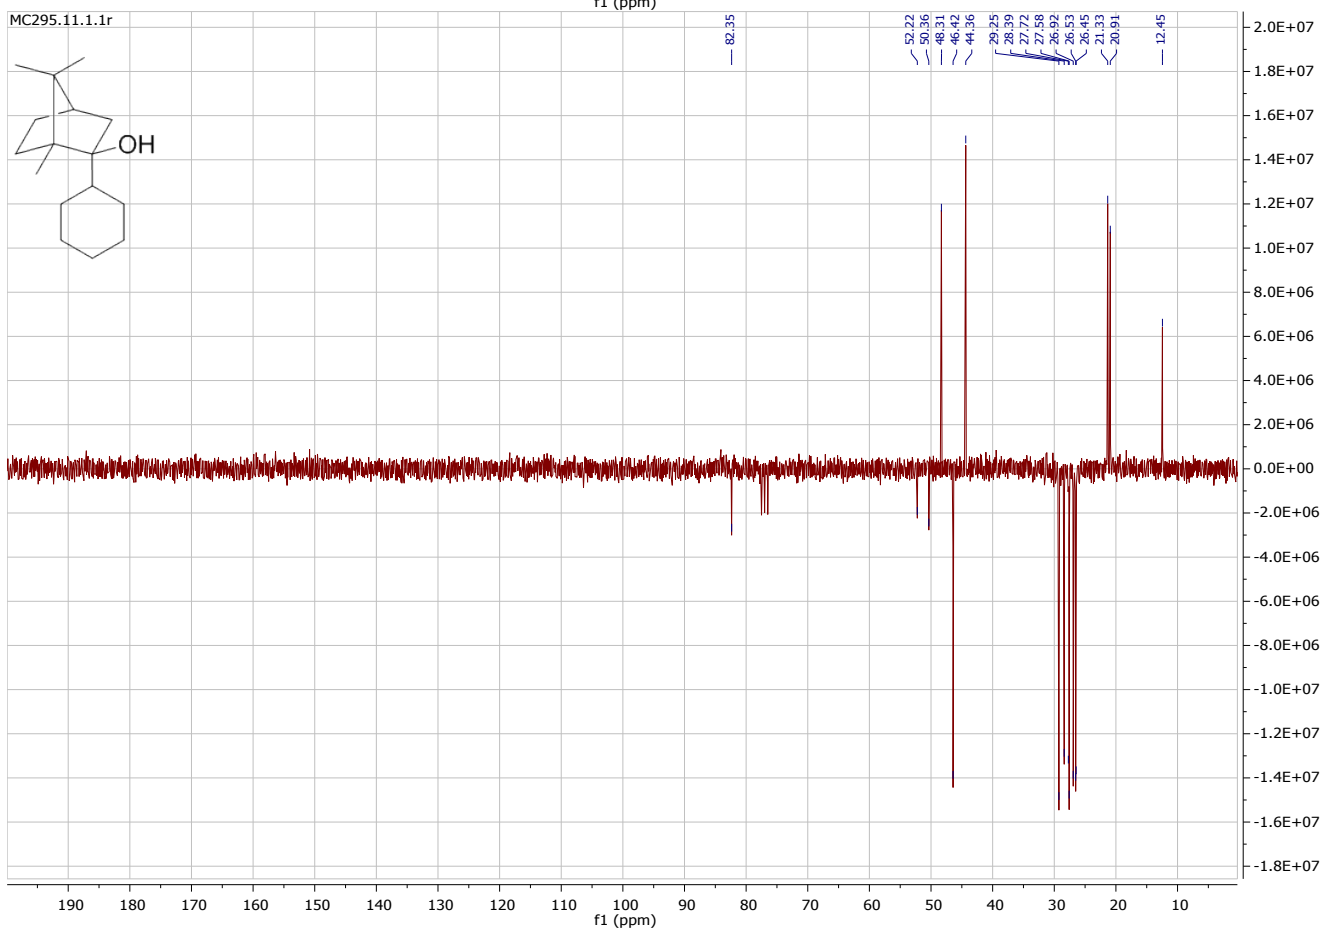

**(1R,2S,3R)-3-[(1S,2S,4R)-2-hydroxy-1,7,7-trimethylbicyclo[2.2.1]heptan-2-yl]cyclohexane-1,2-diol**

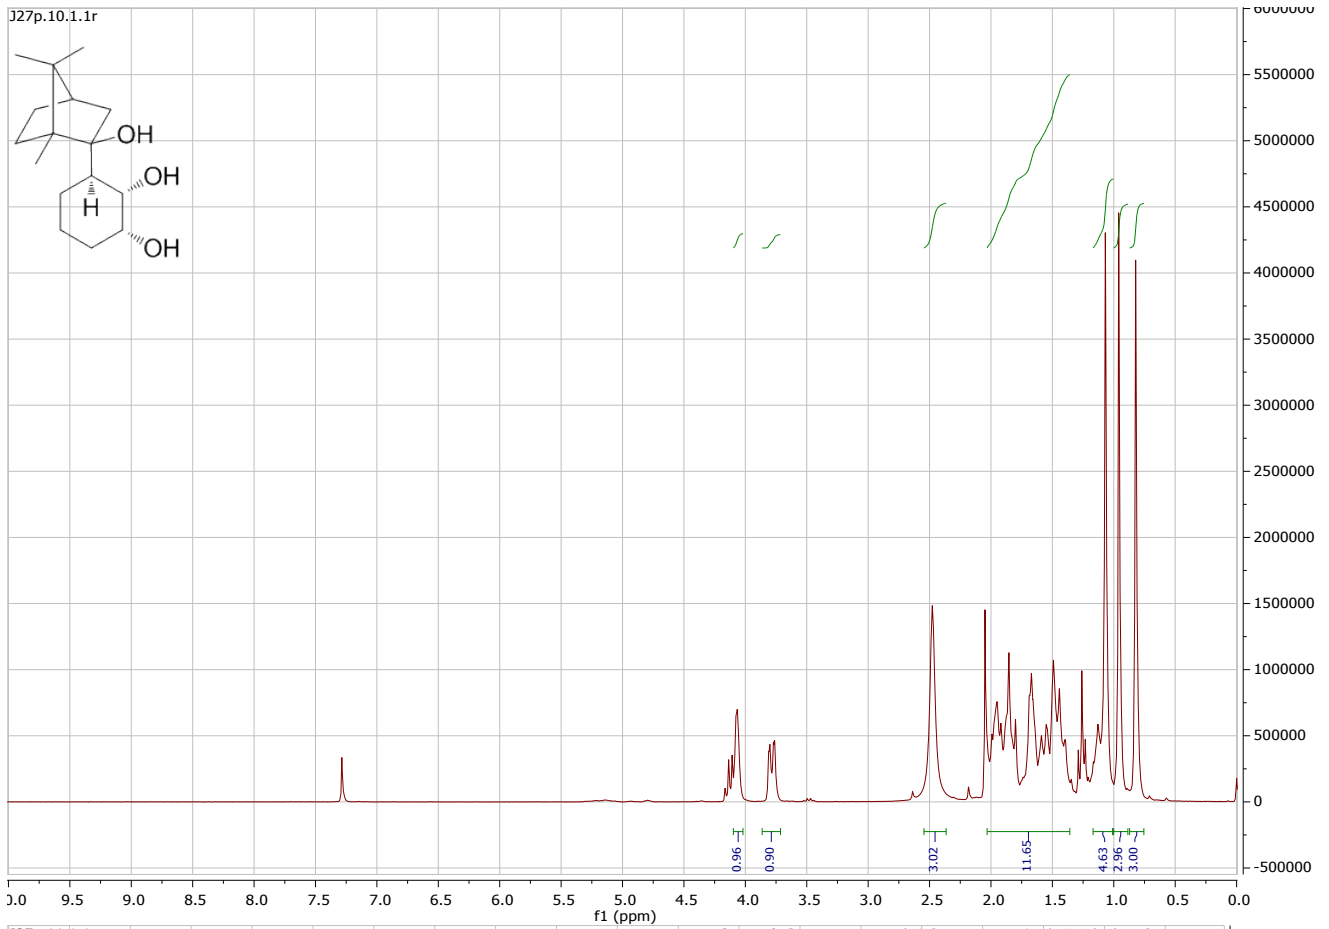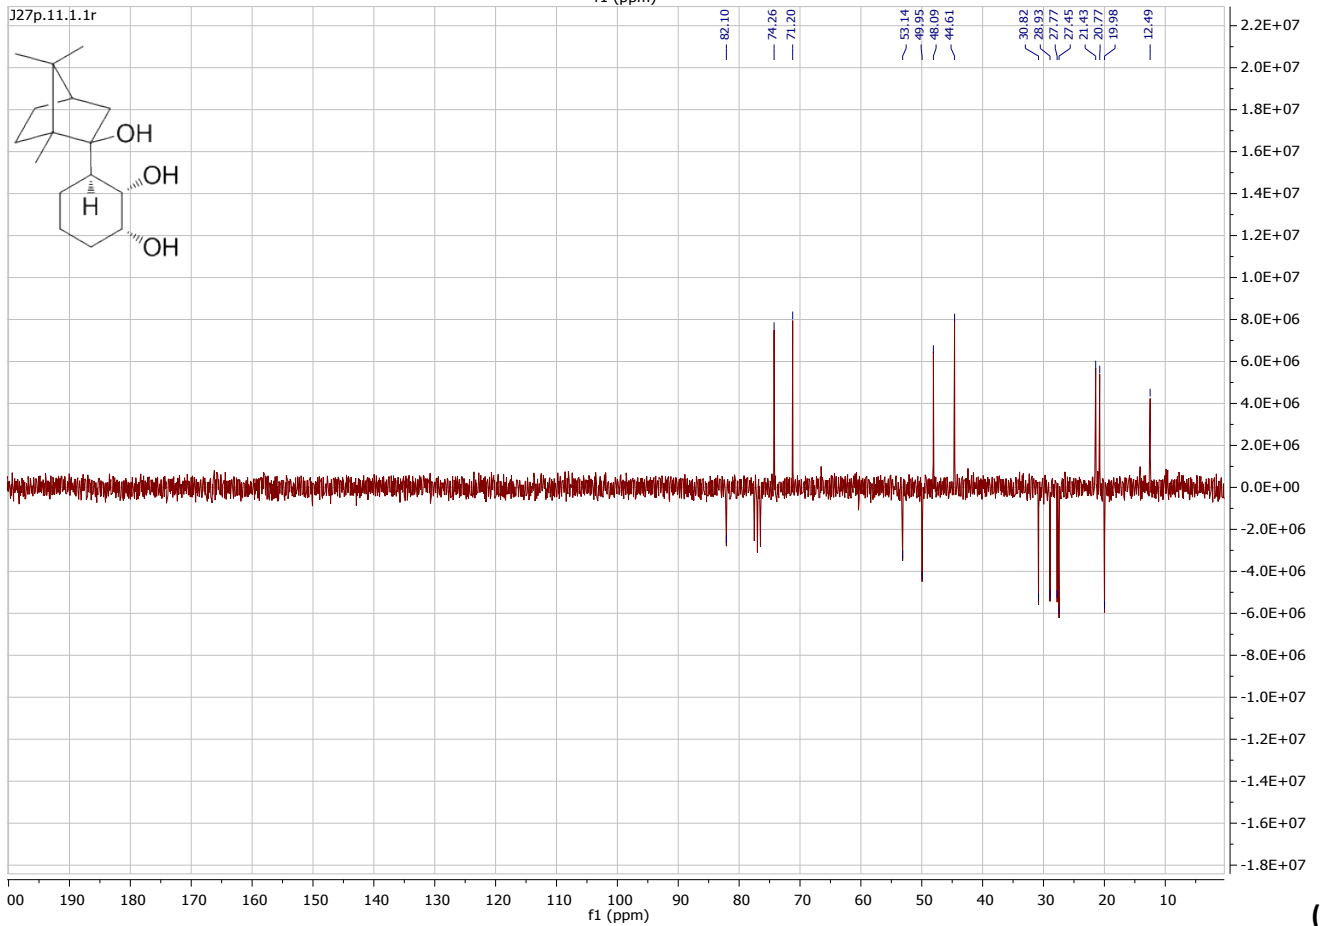

**1R,2S,3R)-3-[(1S,2S,4R)-2-Hydroxy-1,7,7-trimethylbicyclo[2.2.1]heptan-2-yl]cyclohexane-1,2-diyl bis(4-nitrobenzoate) 1''b**

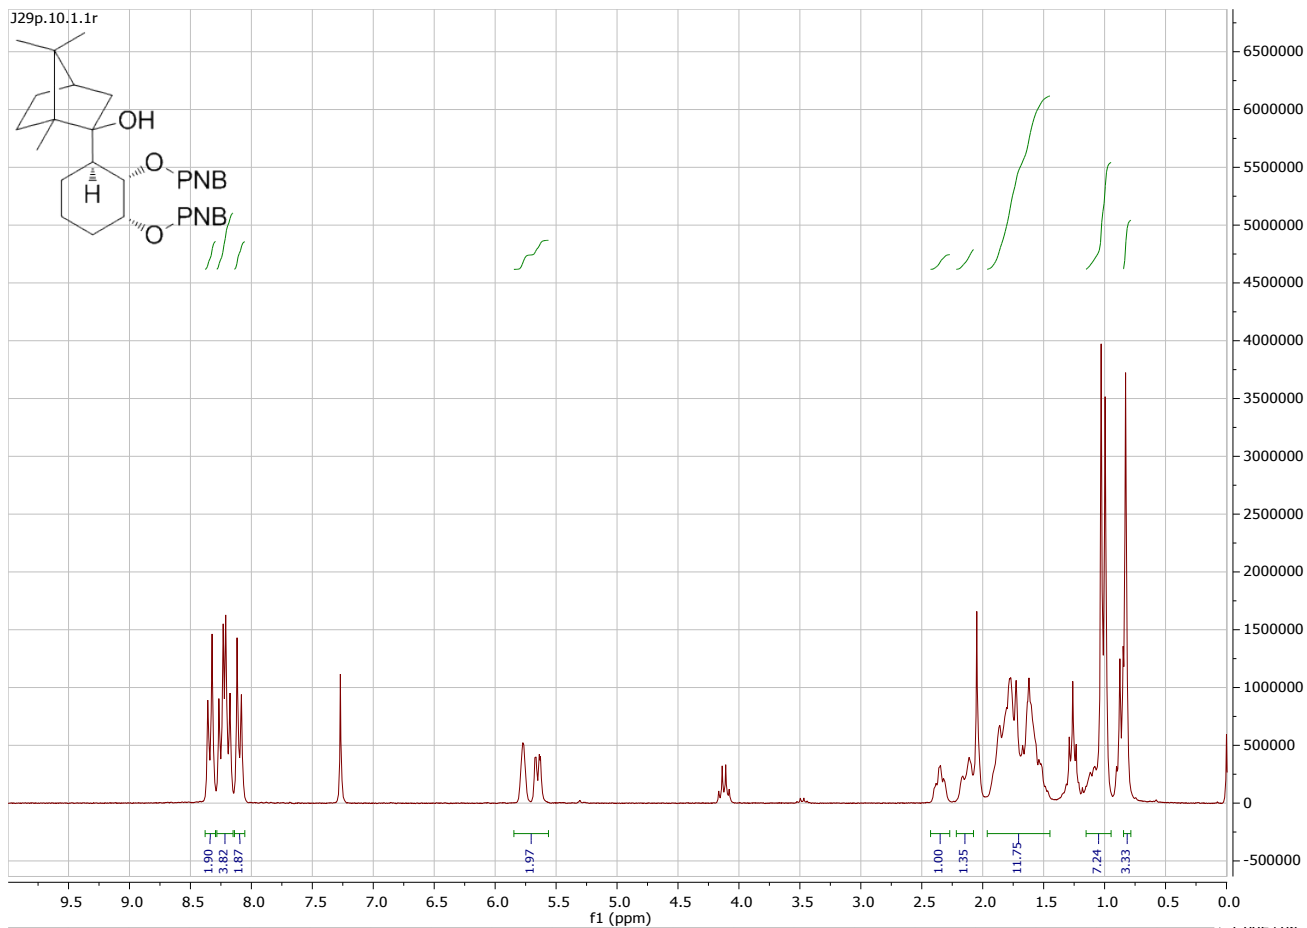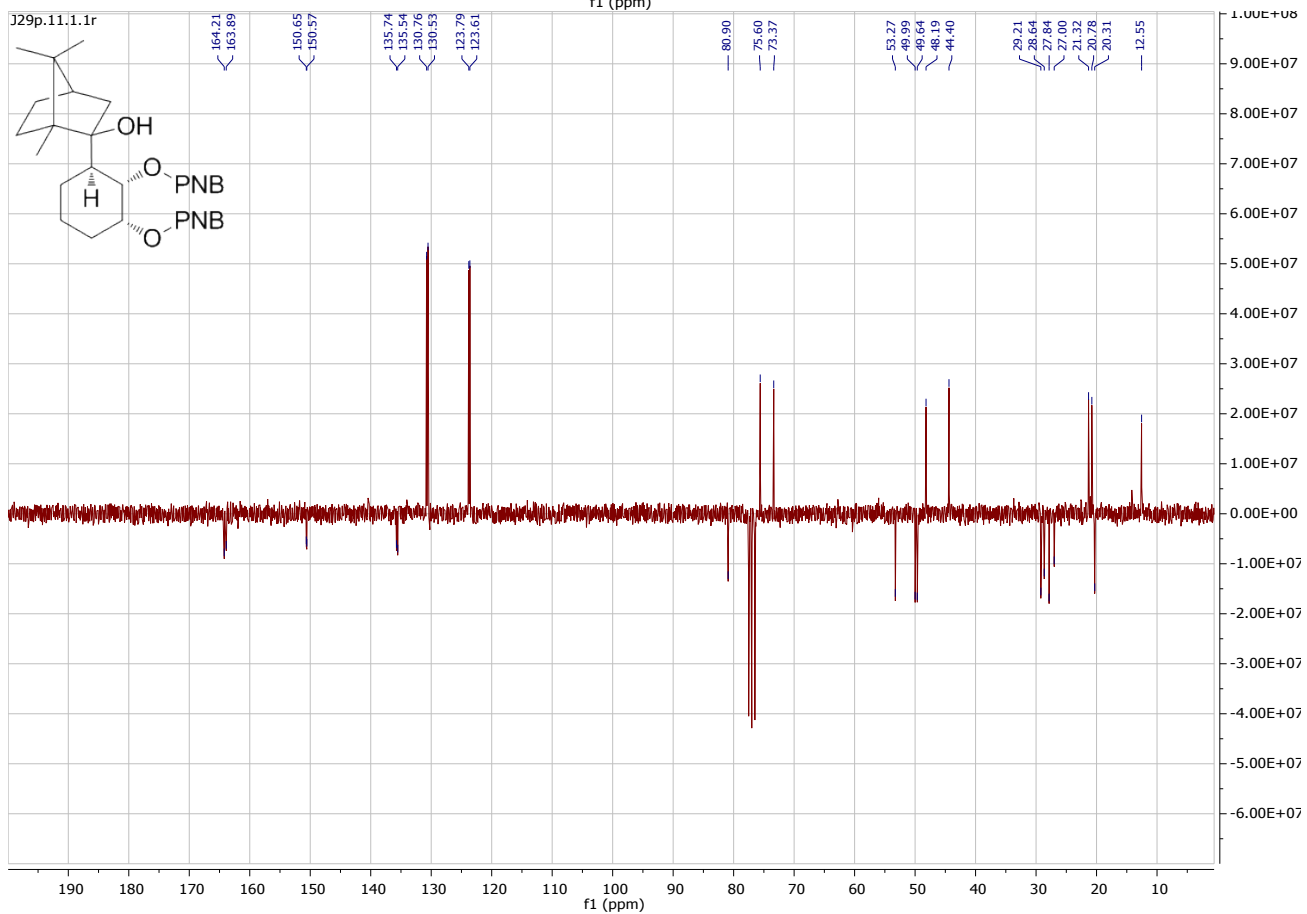

**(R)-[(S)-Cyclopent-2-en-1-yl](phenyl)methanol 4a**



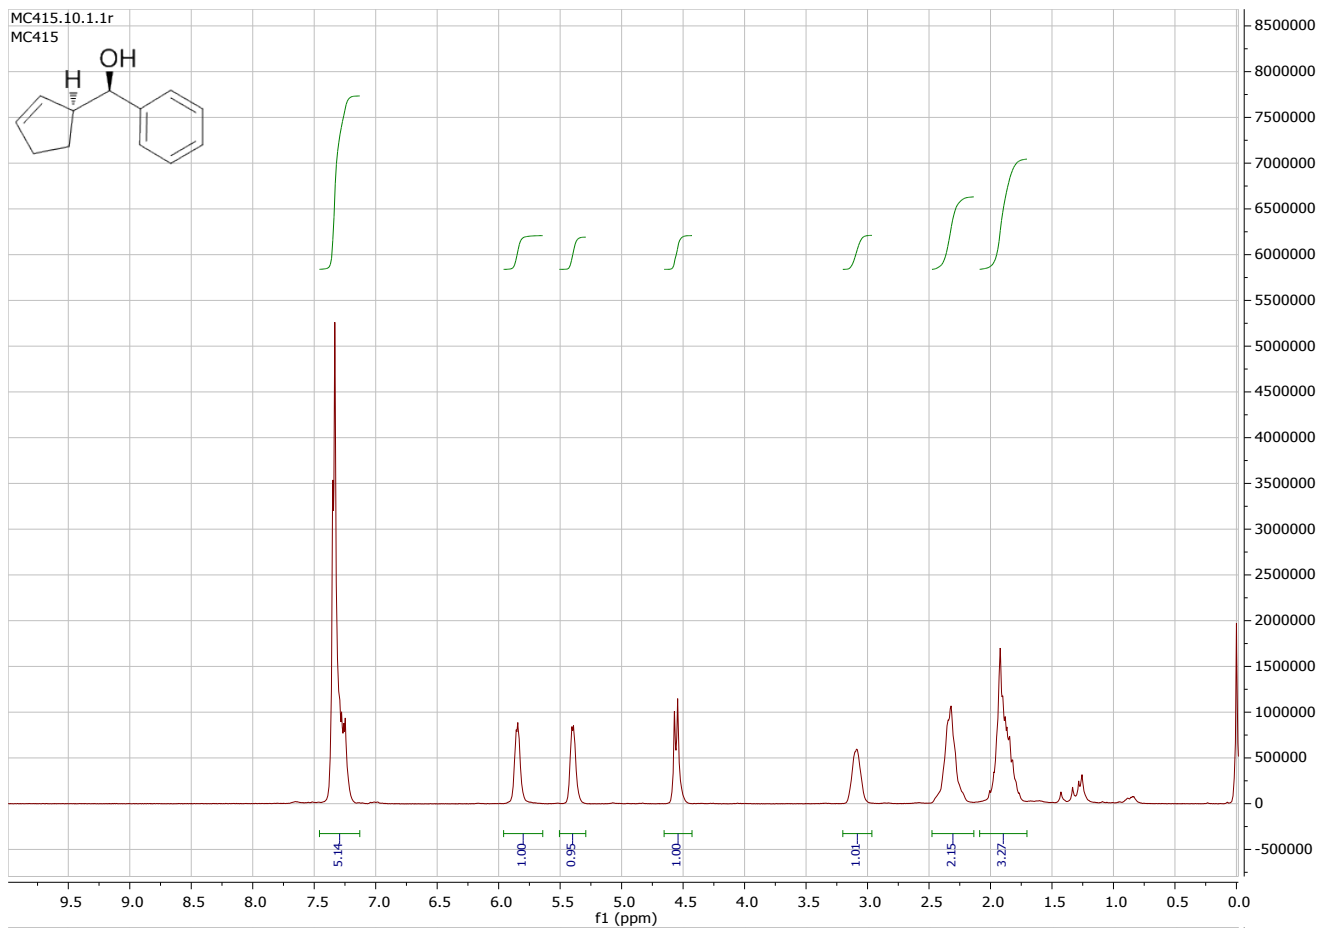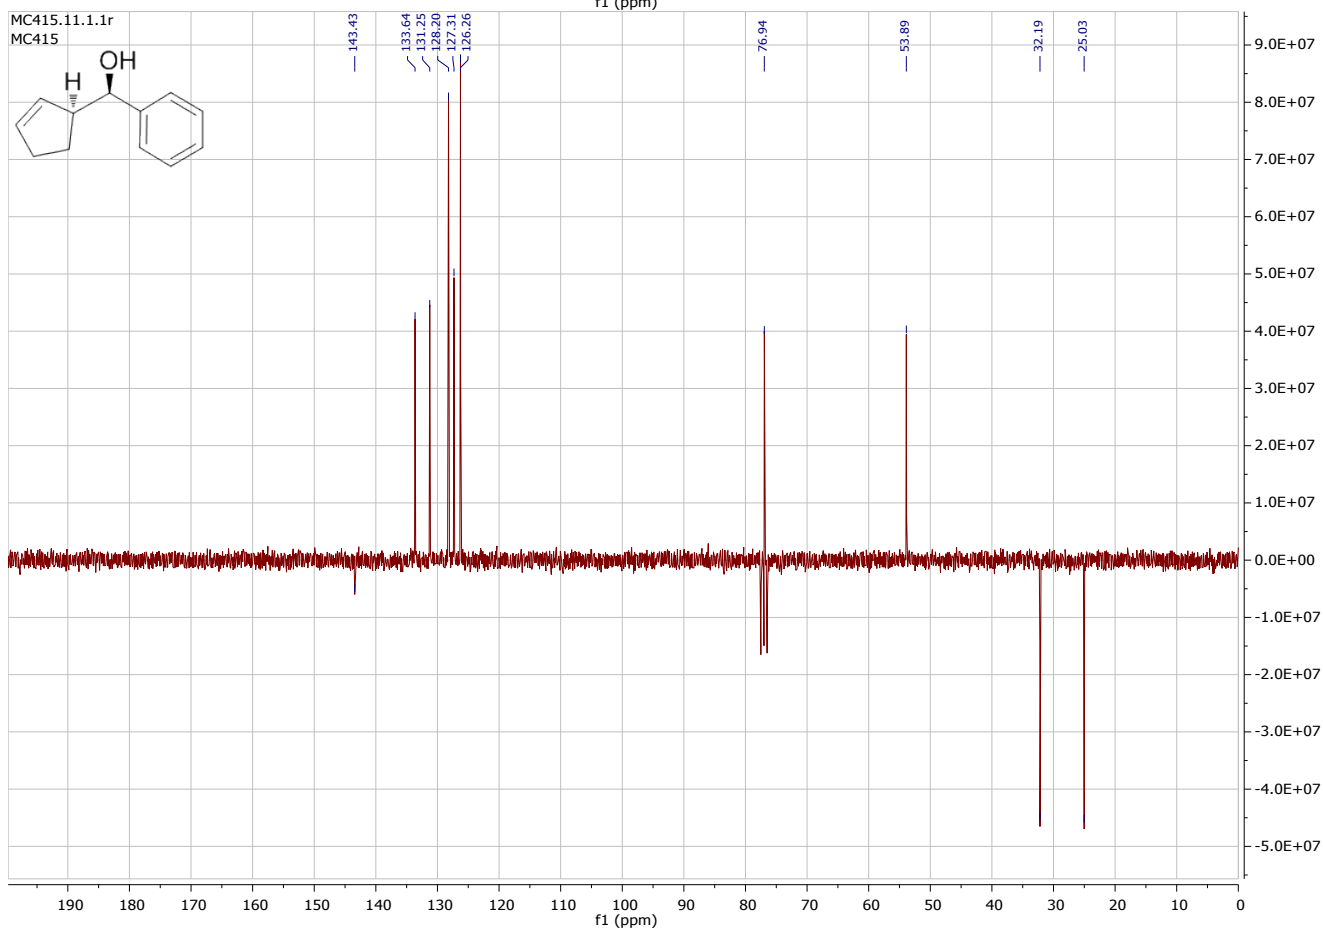

**(R)-[(S)-Cyclohex-2-en-1-yl](phenyl)methanol 3a**

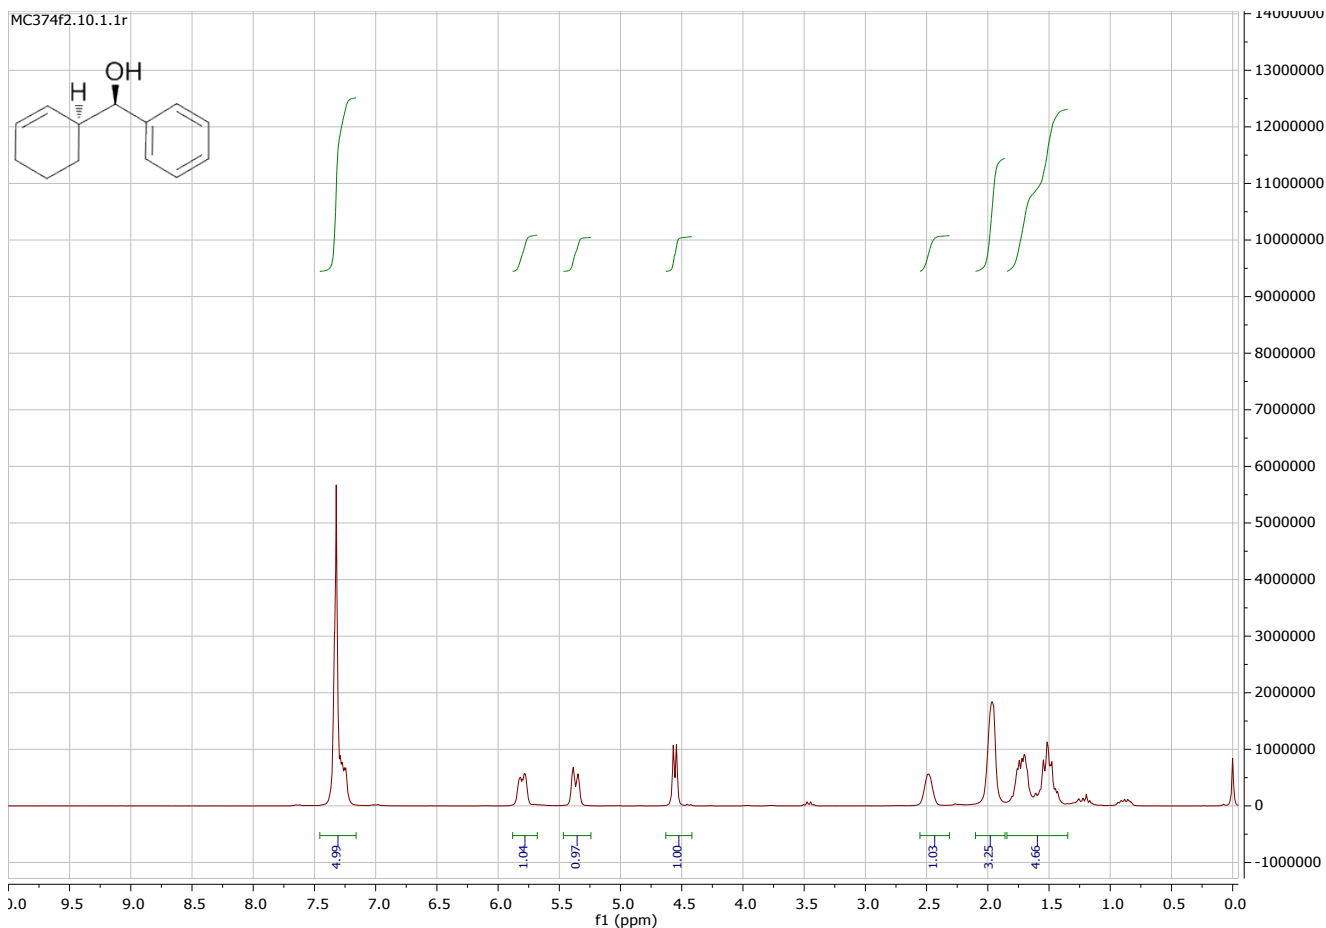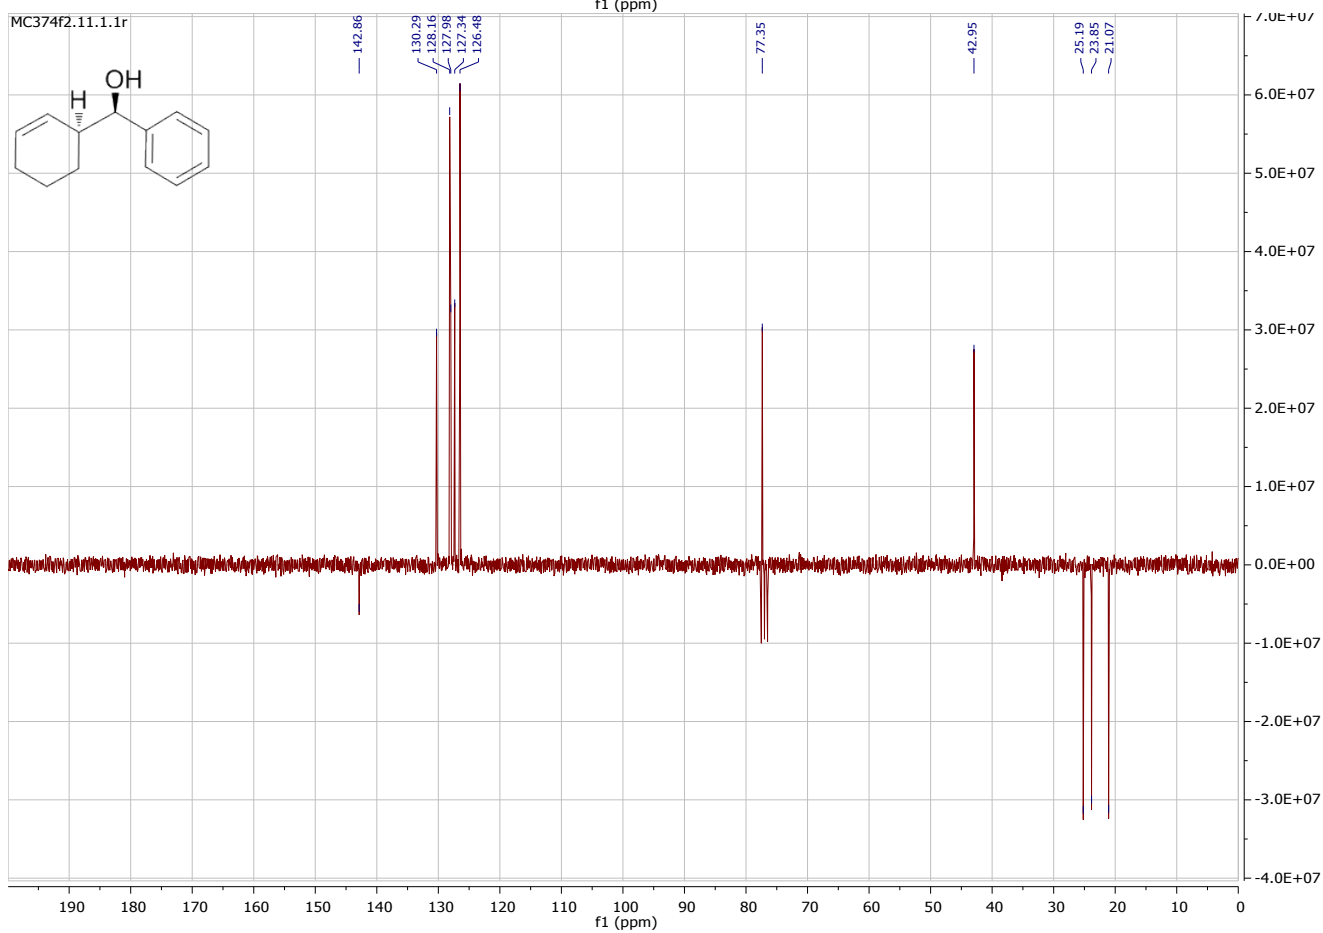

**(R)-(4-Bromophenyl) [(S)-cyclohex-2-en-1-yl]methanol 3b**

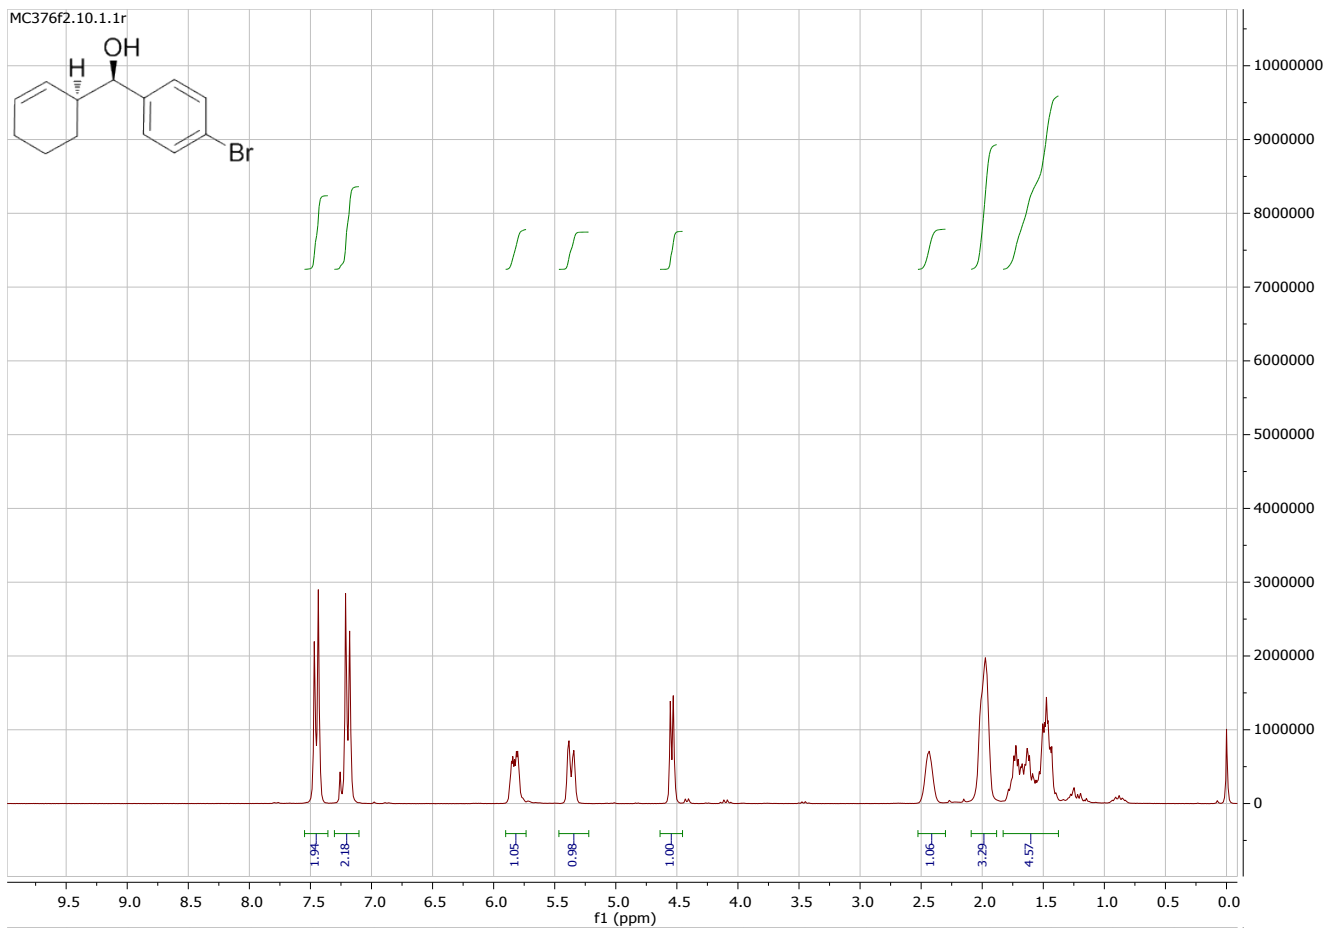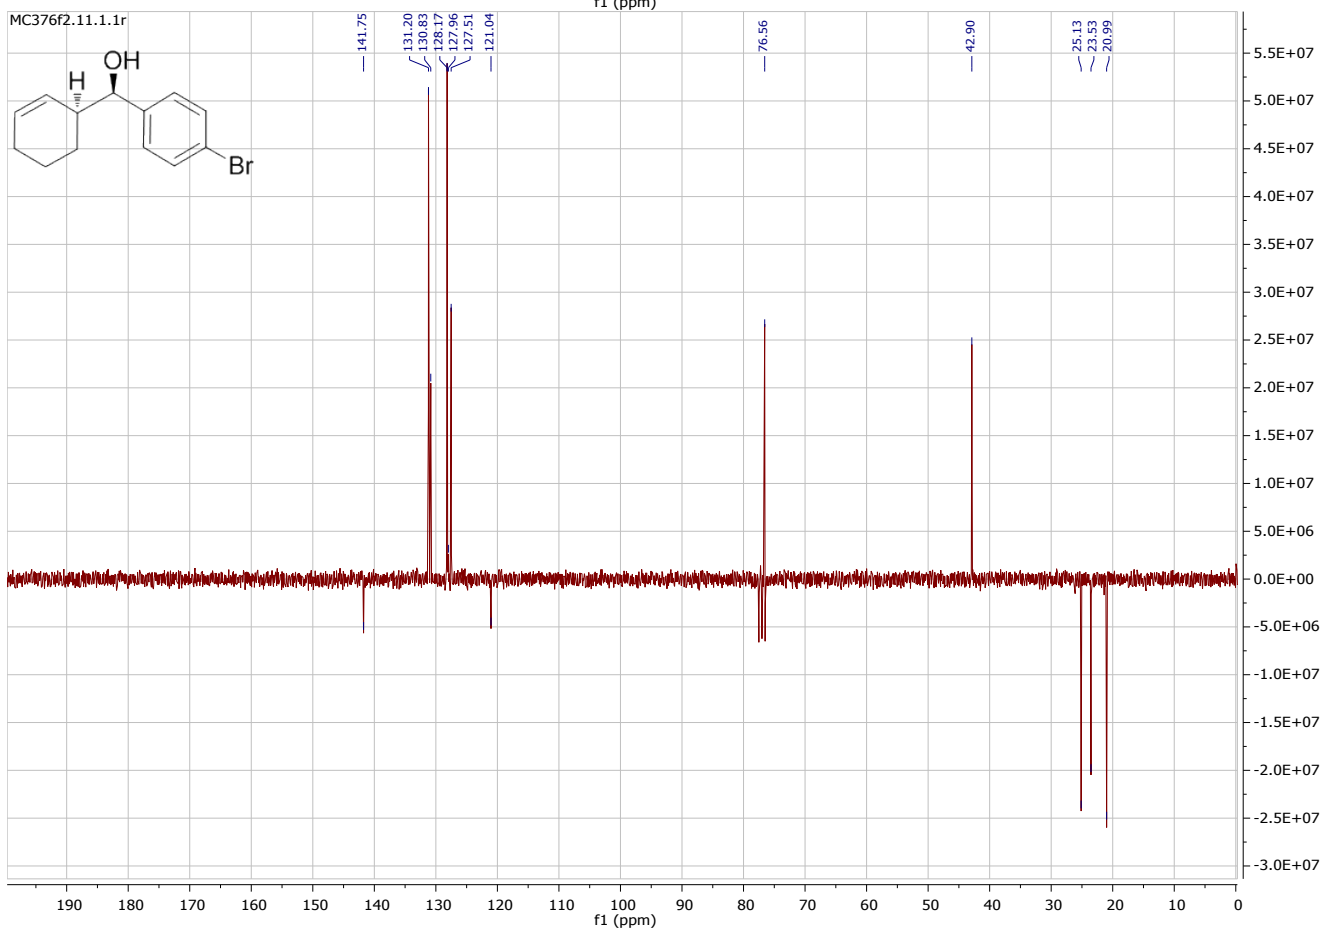

**(R)- [(S)-Cyclohex-2-en-1-yl](3,4-dichlorophenyl)methanol 3c**

MC395f2.10.1.1r

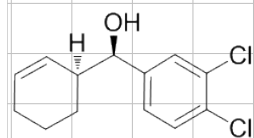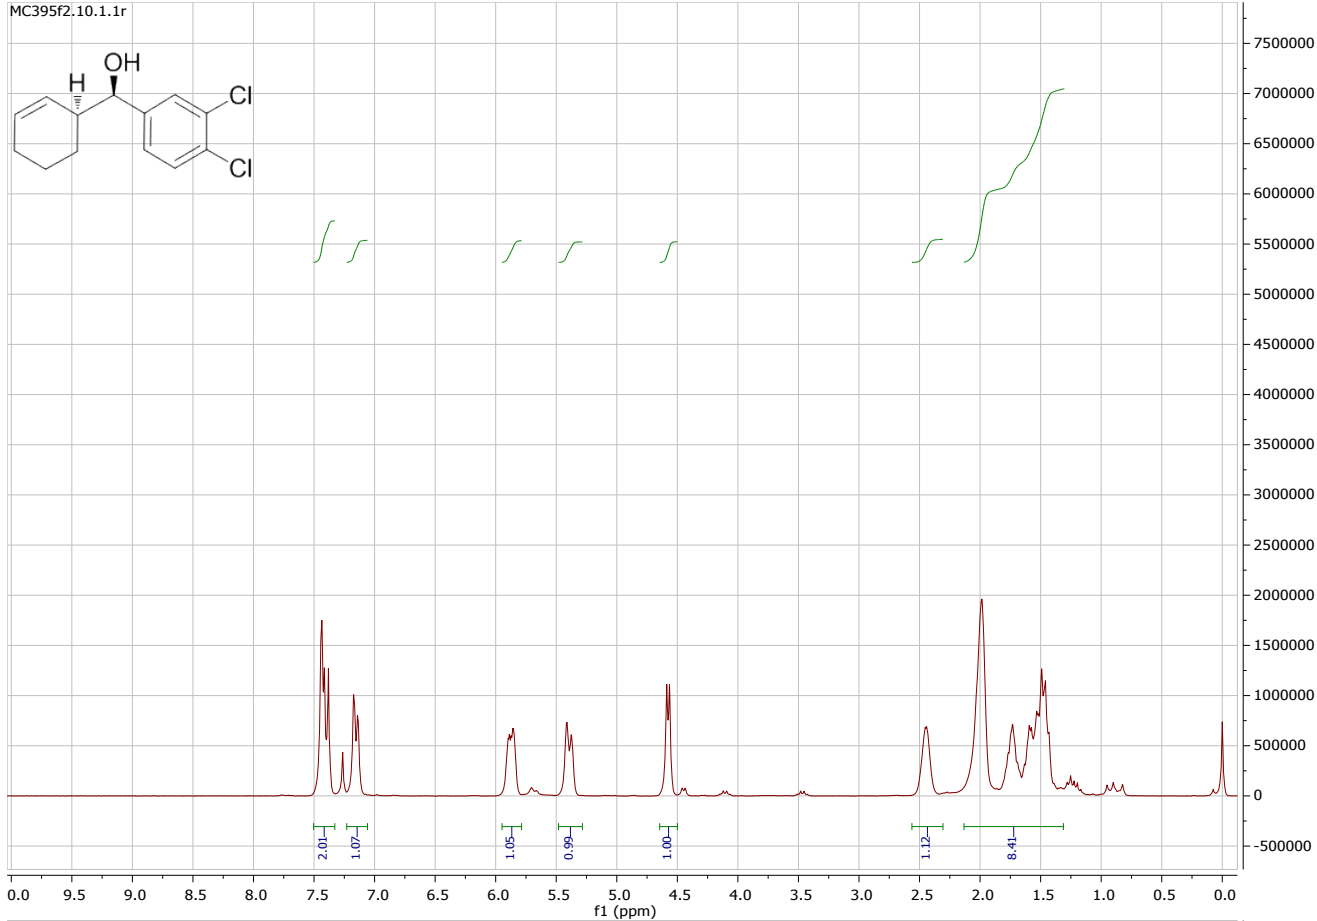

MC395f2.11.1.1r

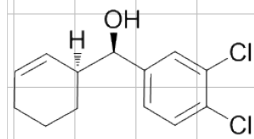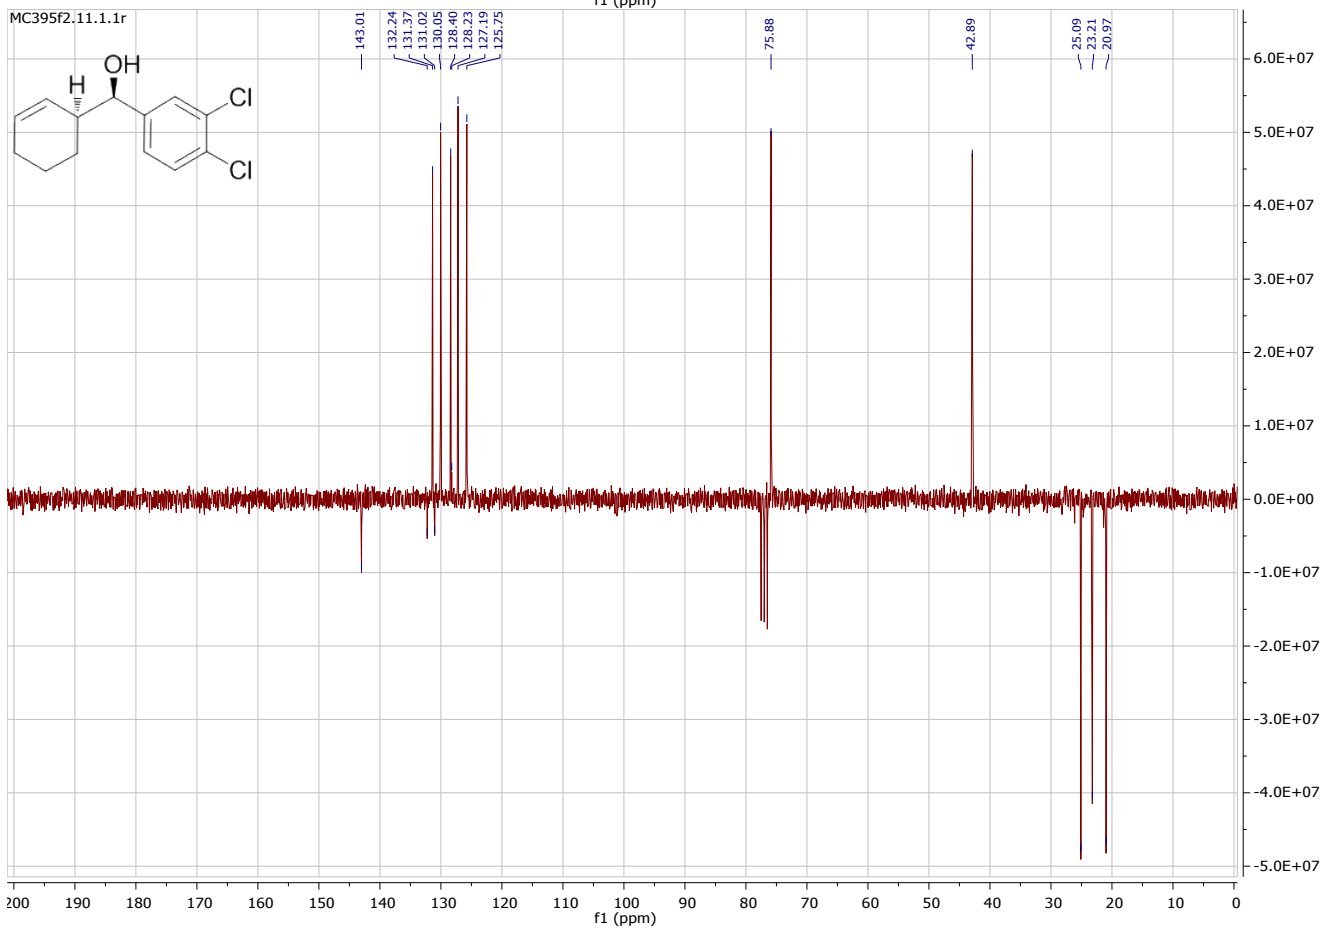

**(R)-(6-Bromobenzo[d][1,3]dioxol-5-yl)((S)-cyclohex-2-en-1-yl)methanol 3d**

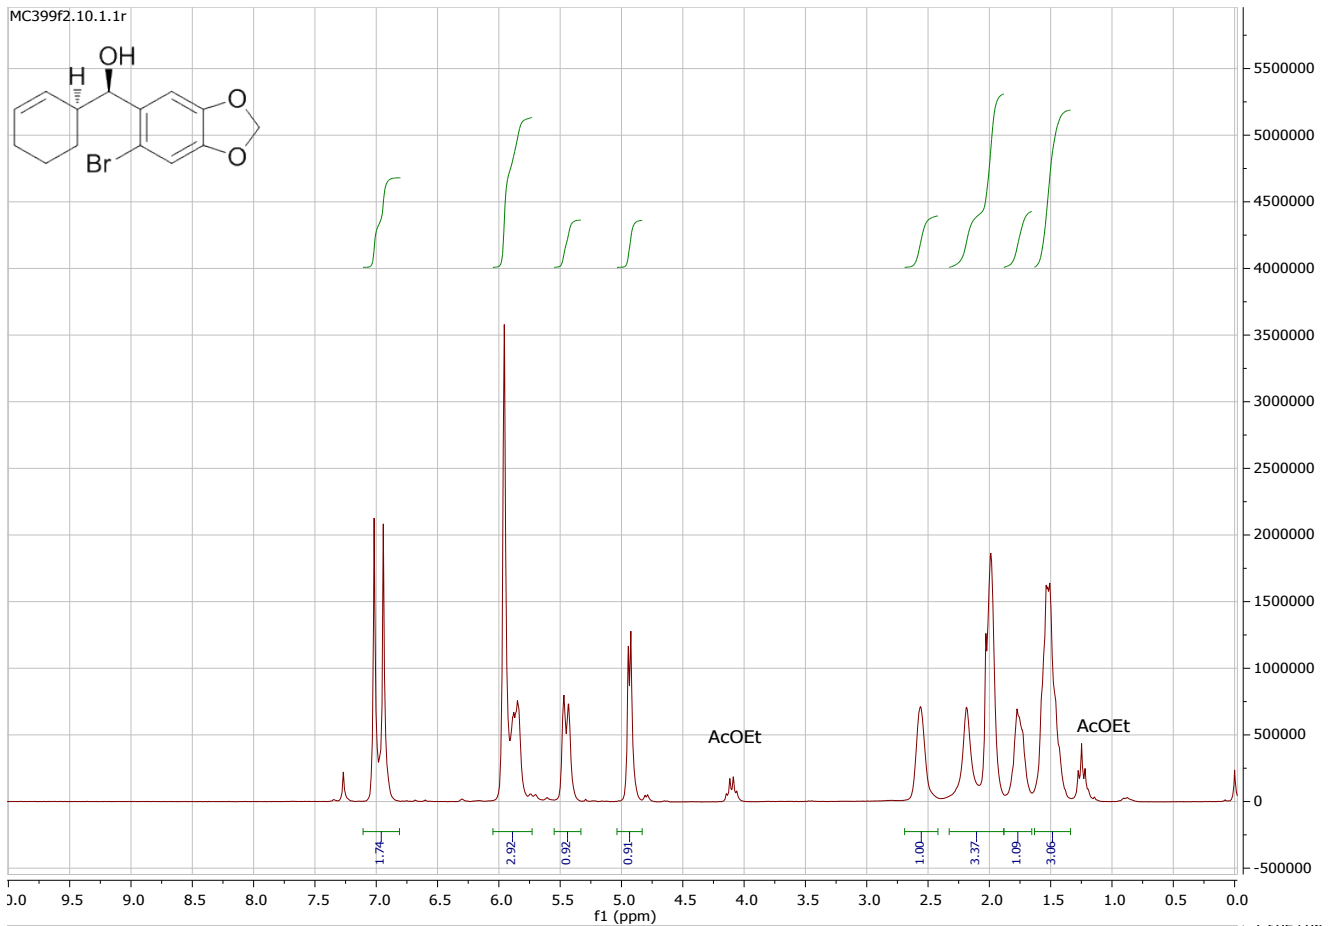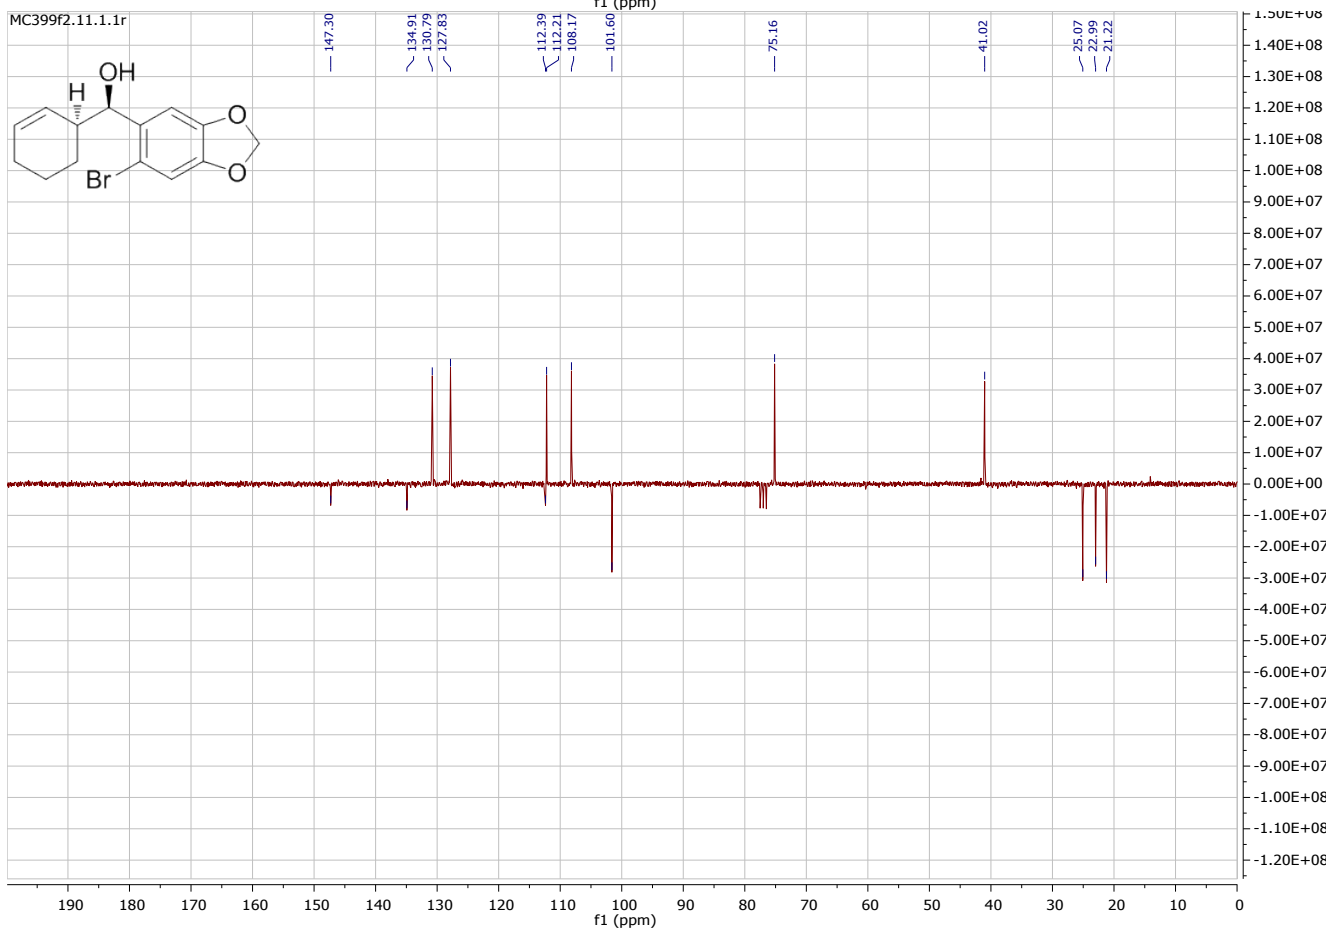

Methyl 4-[(R)-[(S)-cyclohex-2-en-1-yl](hydroxy)methyl]benzoate 3e

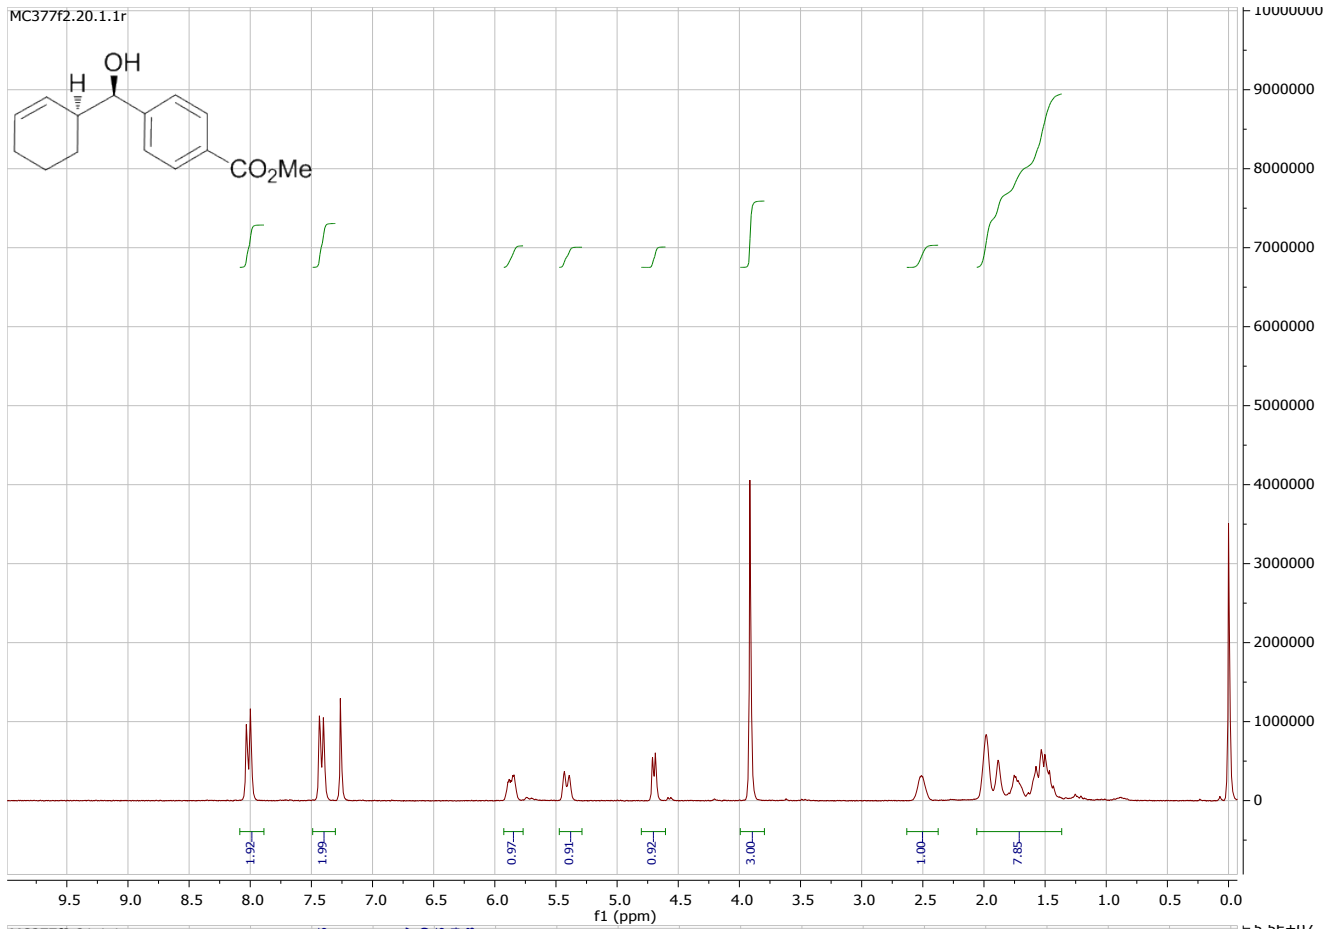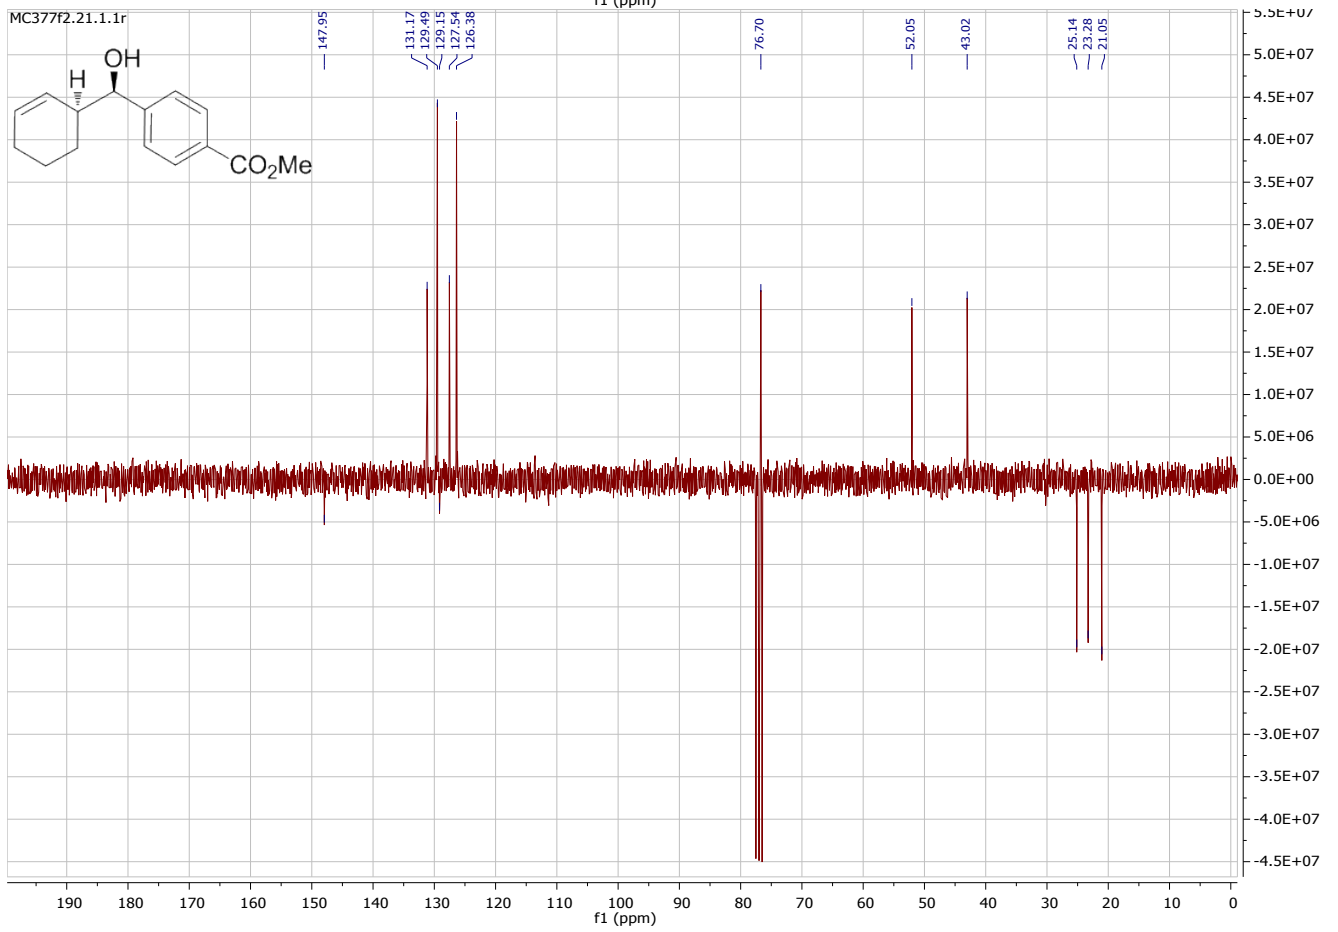

(R)- [(S)-Cyclohex-2-en-1-yl](pyridin-3-yl)methanol 3f

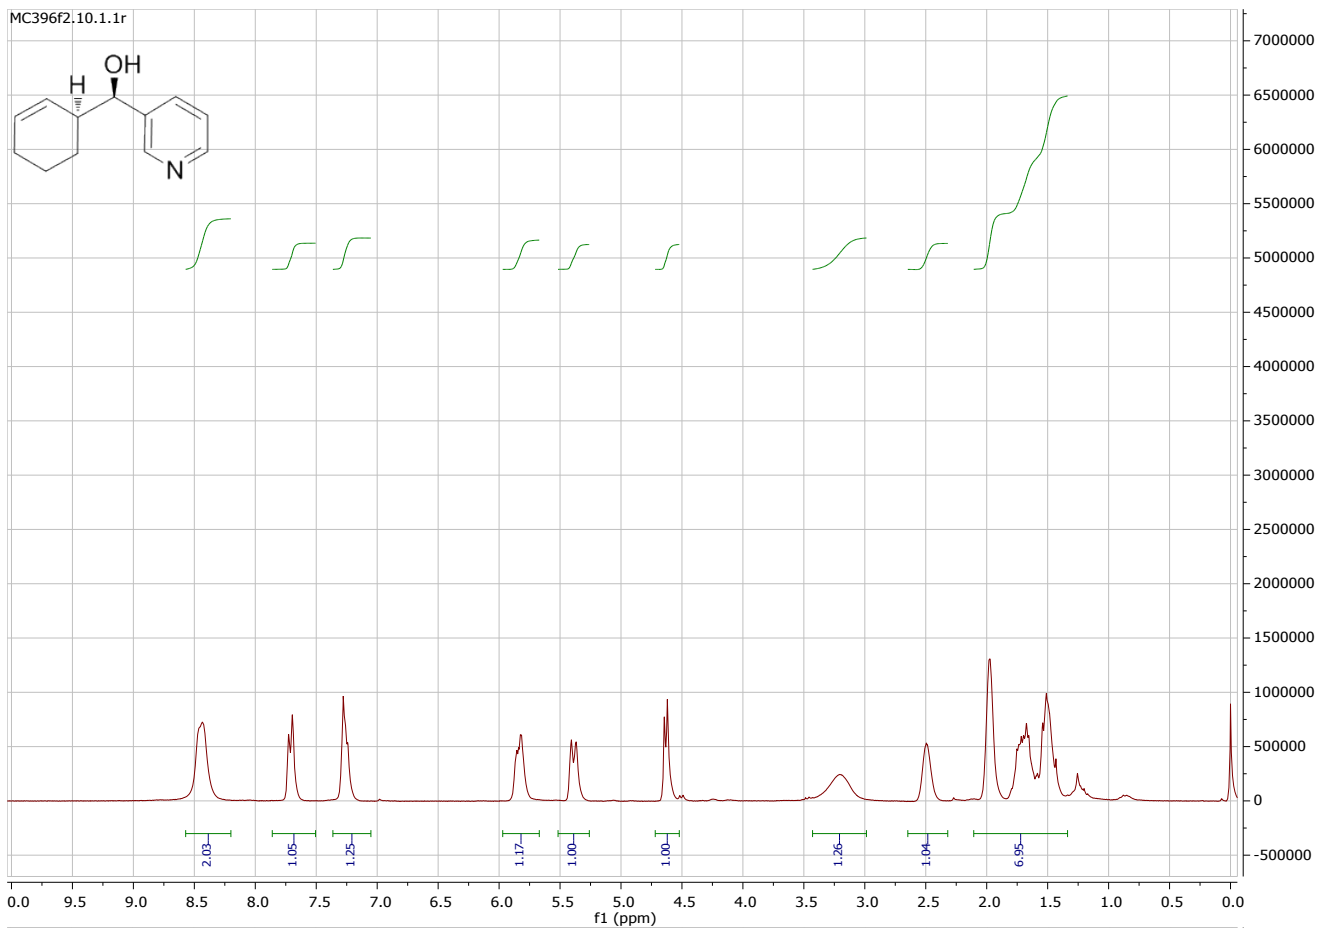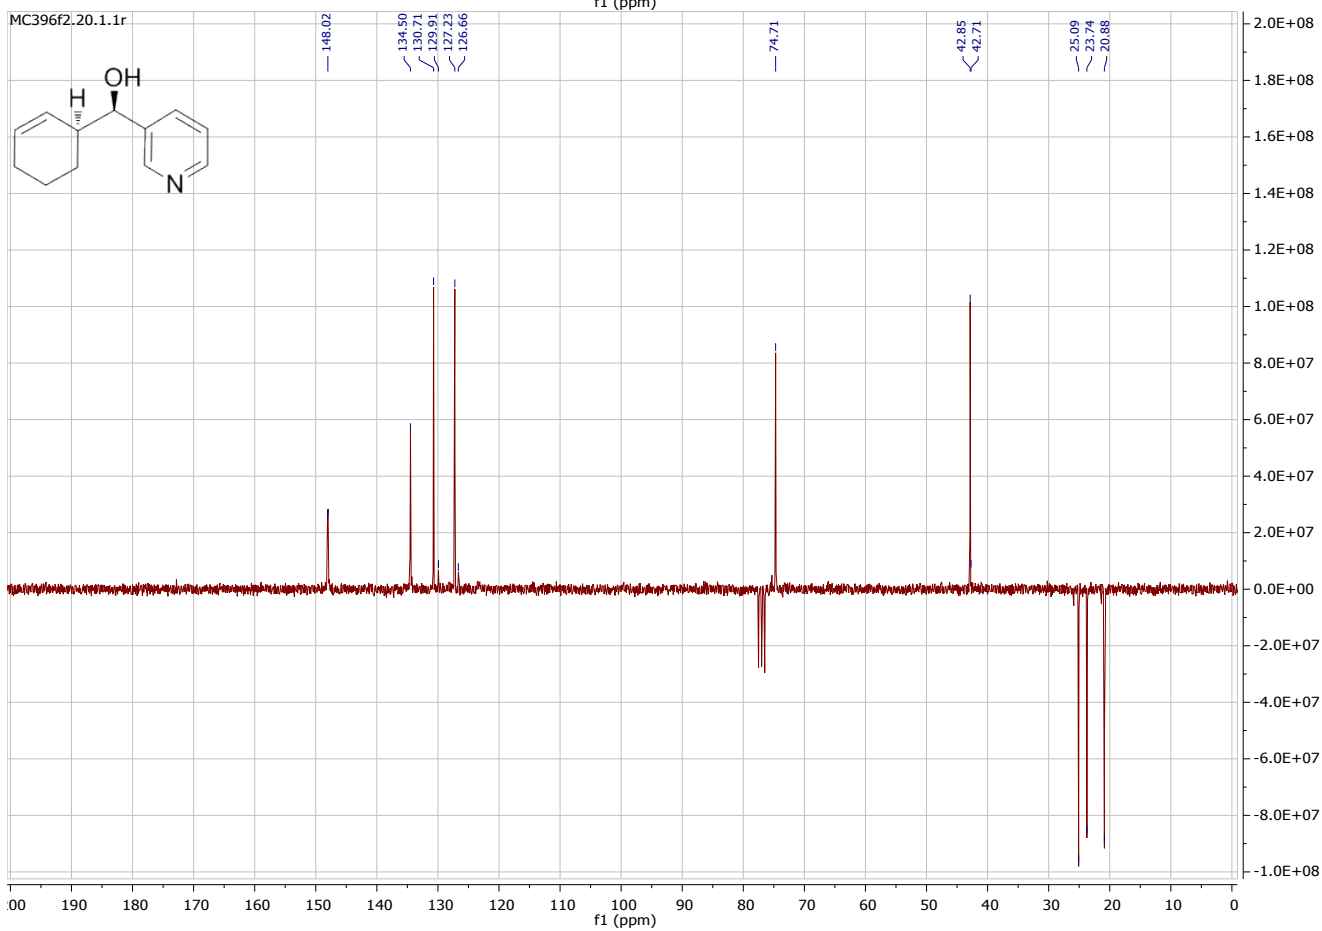

(R)- [(S)-Cyclohex-2-en-1-yl](furan-3-yl)methanol 3g

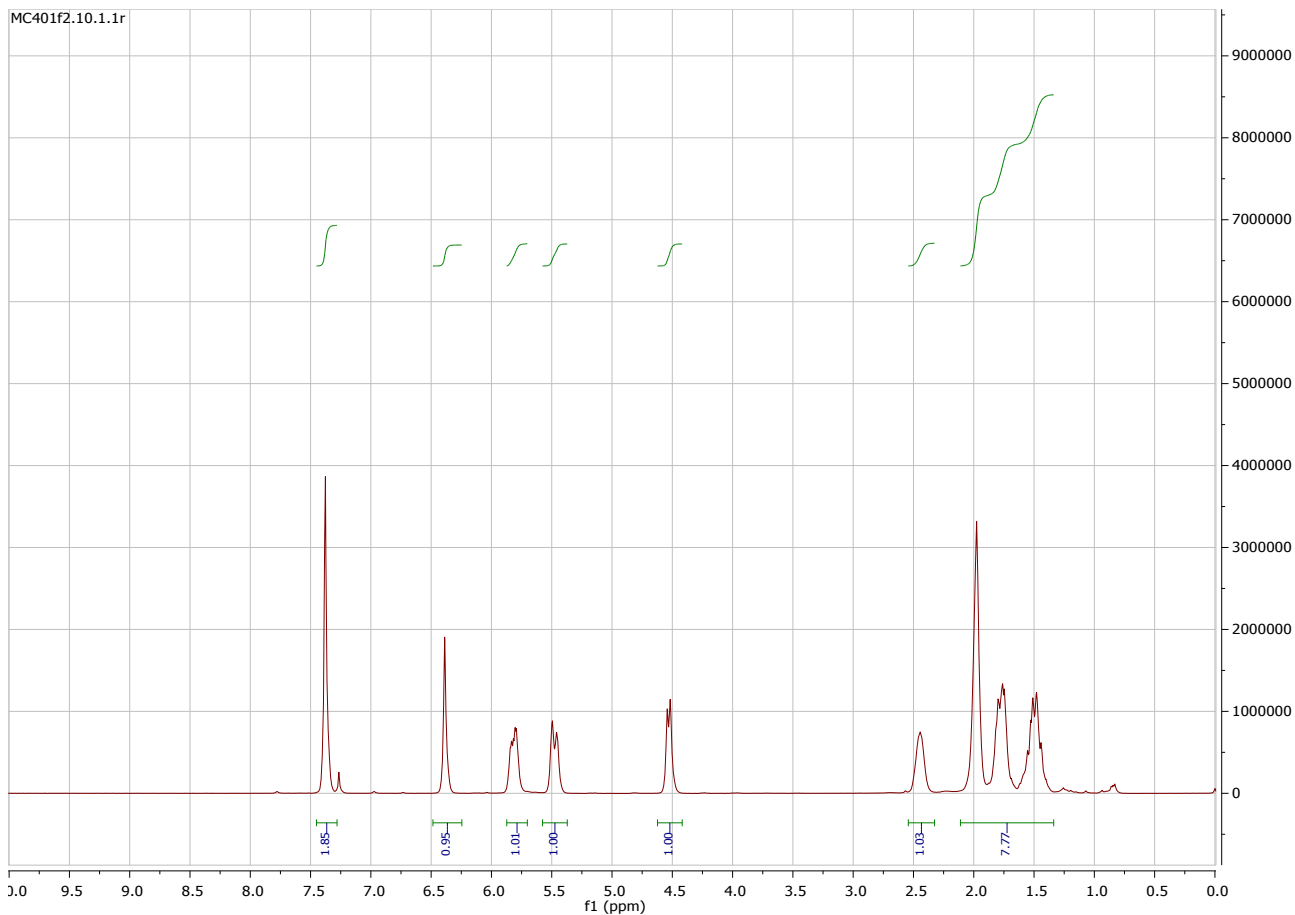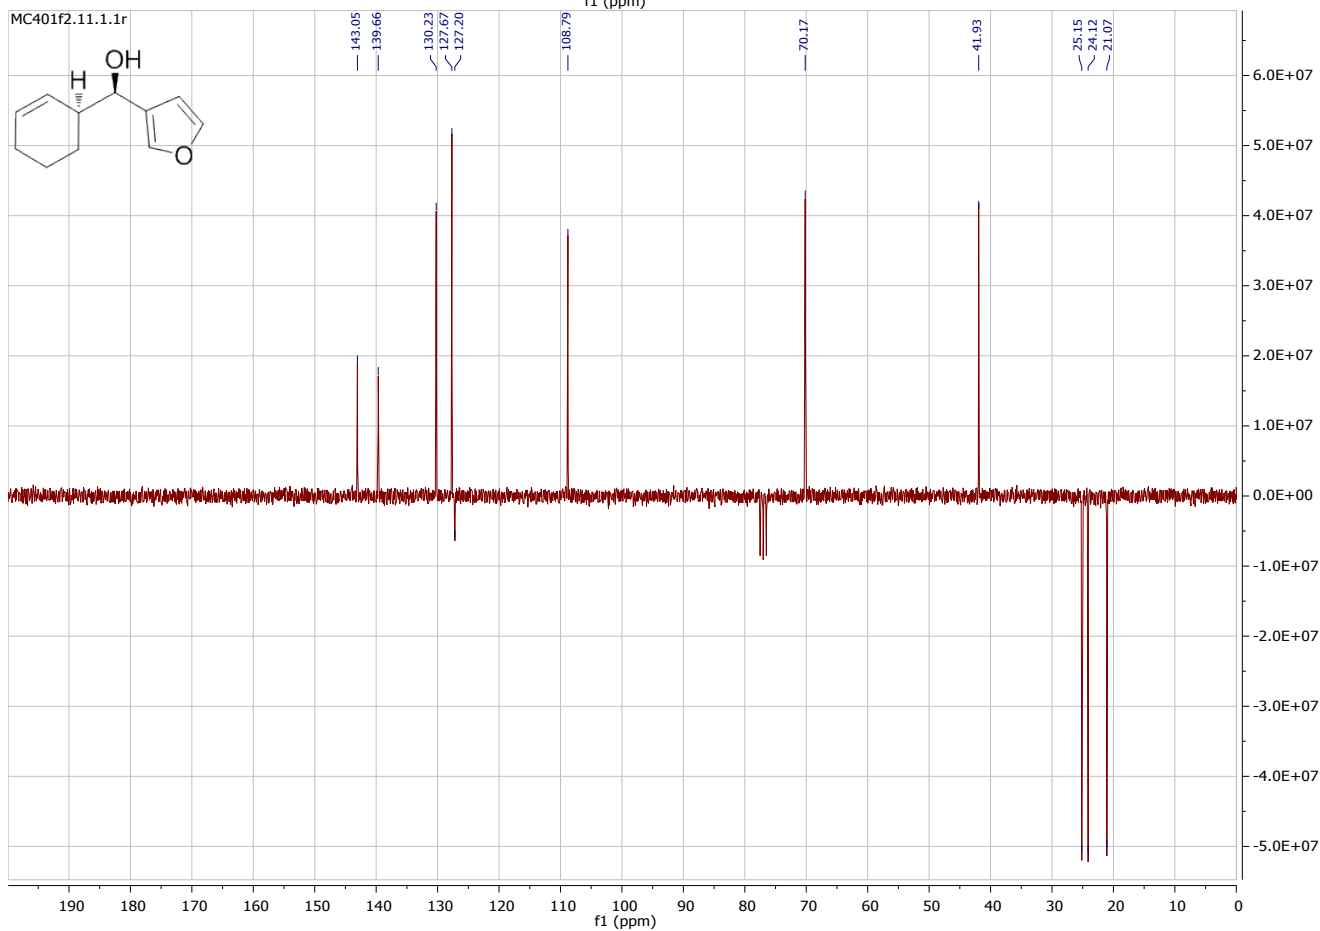

**(R)- [(S)-Cyclohex-2-en-1-yl](1H-indol-2-yl)methanol 3h**



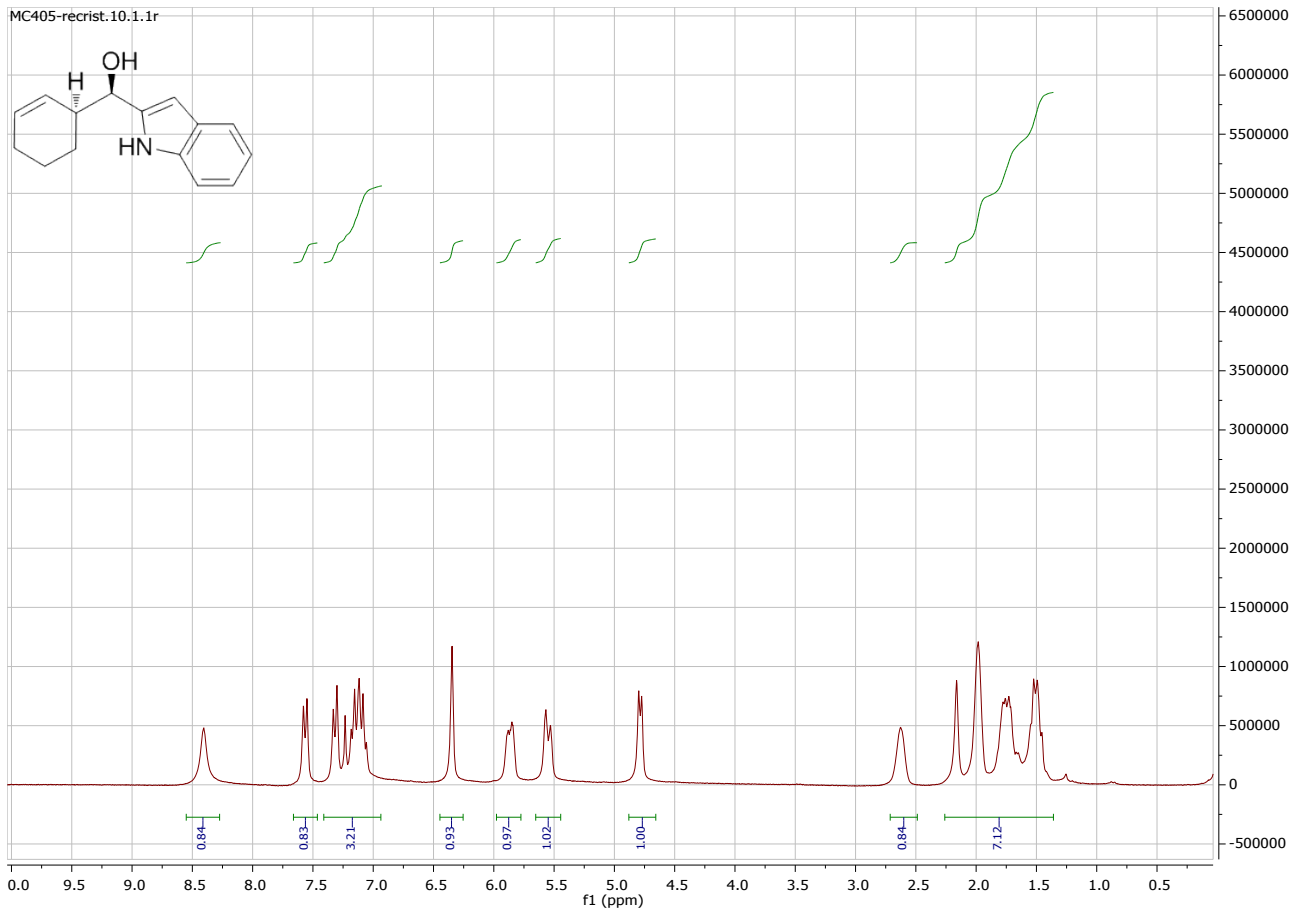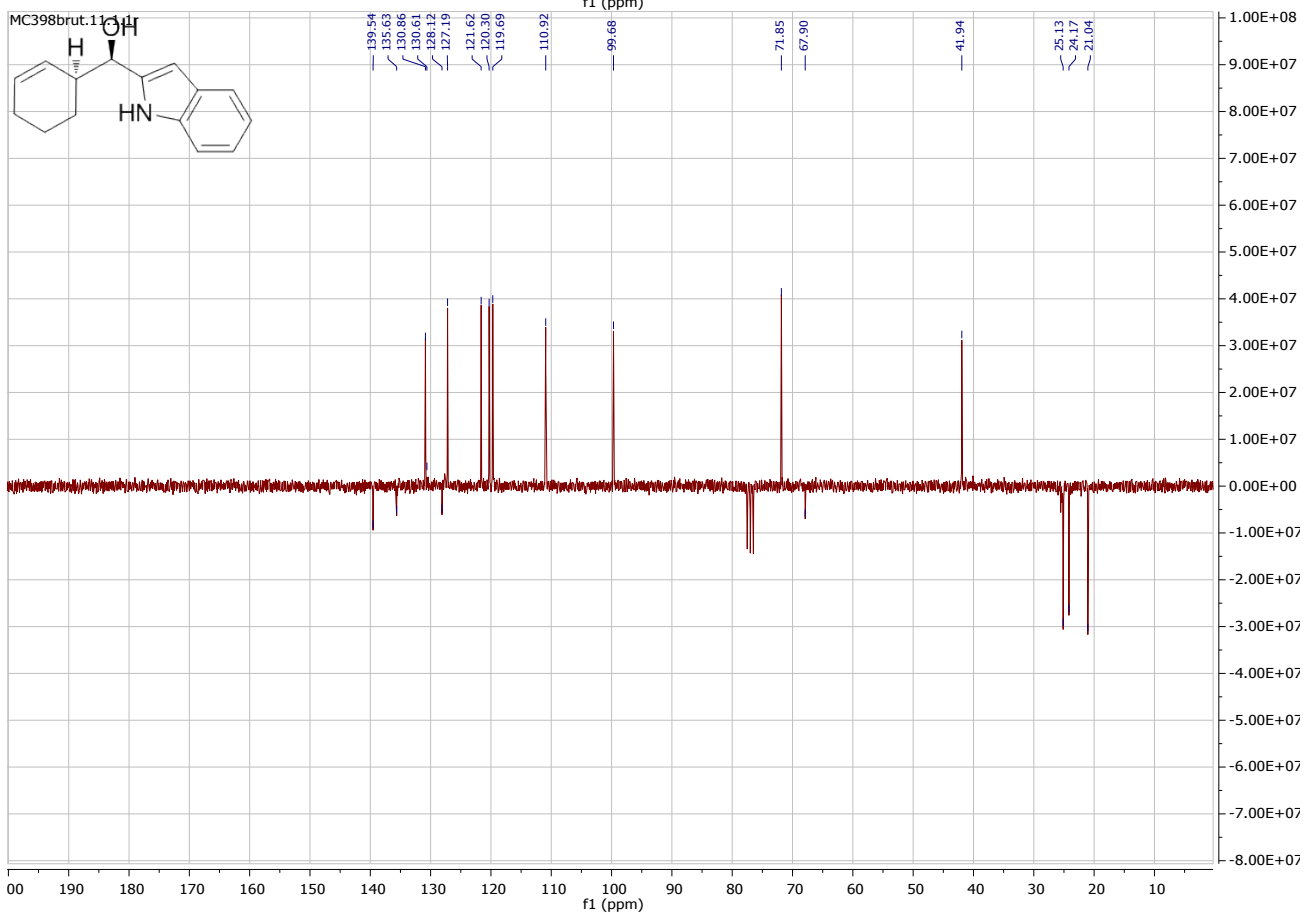

(*S,E*)-1-[(*S*)-Cyclohex-2-en-1-yl]-3-phenylprop-2-en-1-ol 3i

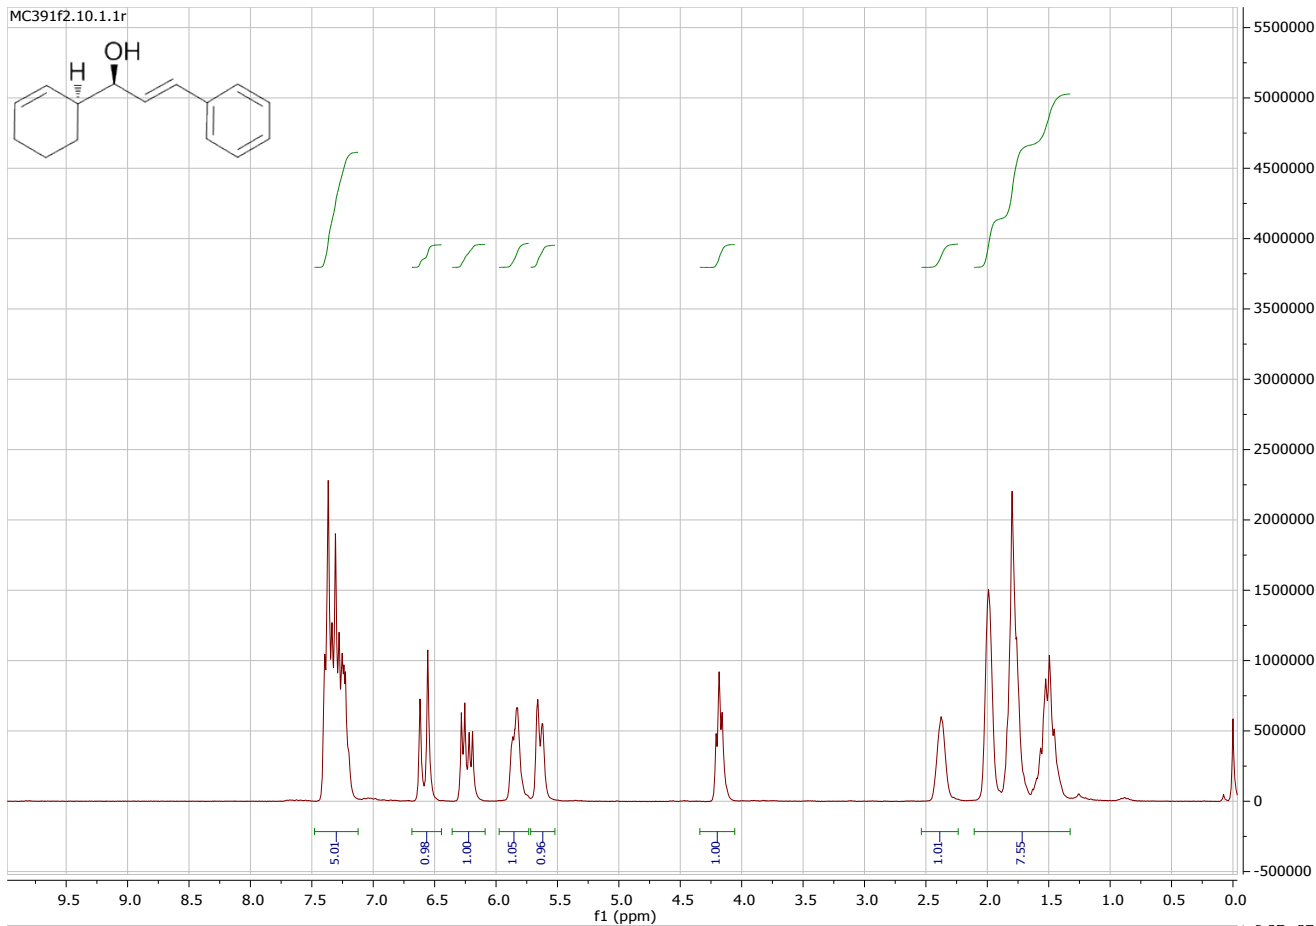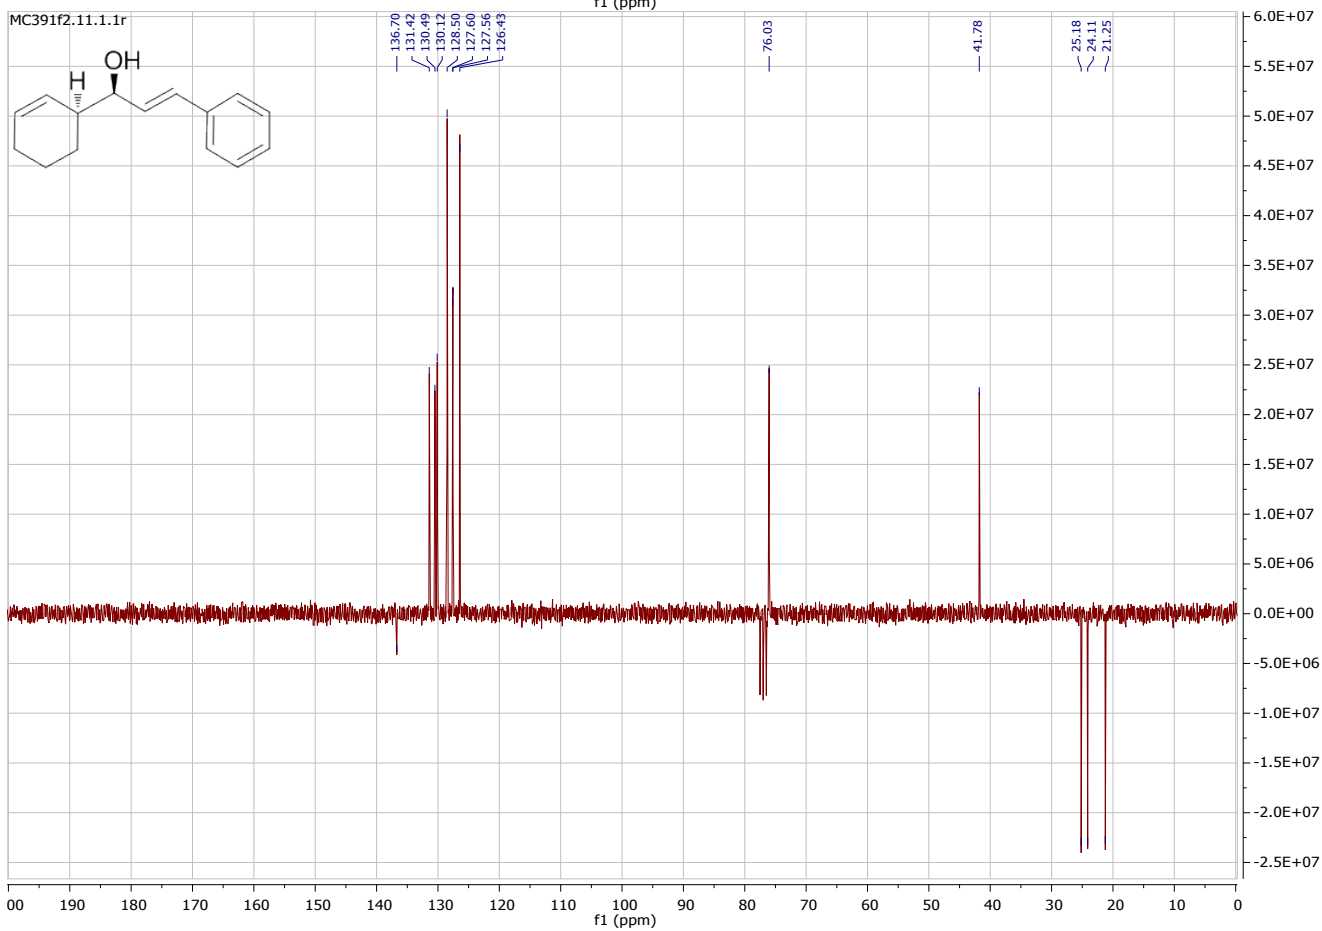

**(R)-1-[(S)-Cyclohex-2-en-1-yl]-2,2-diphenylethanol 3j**

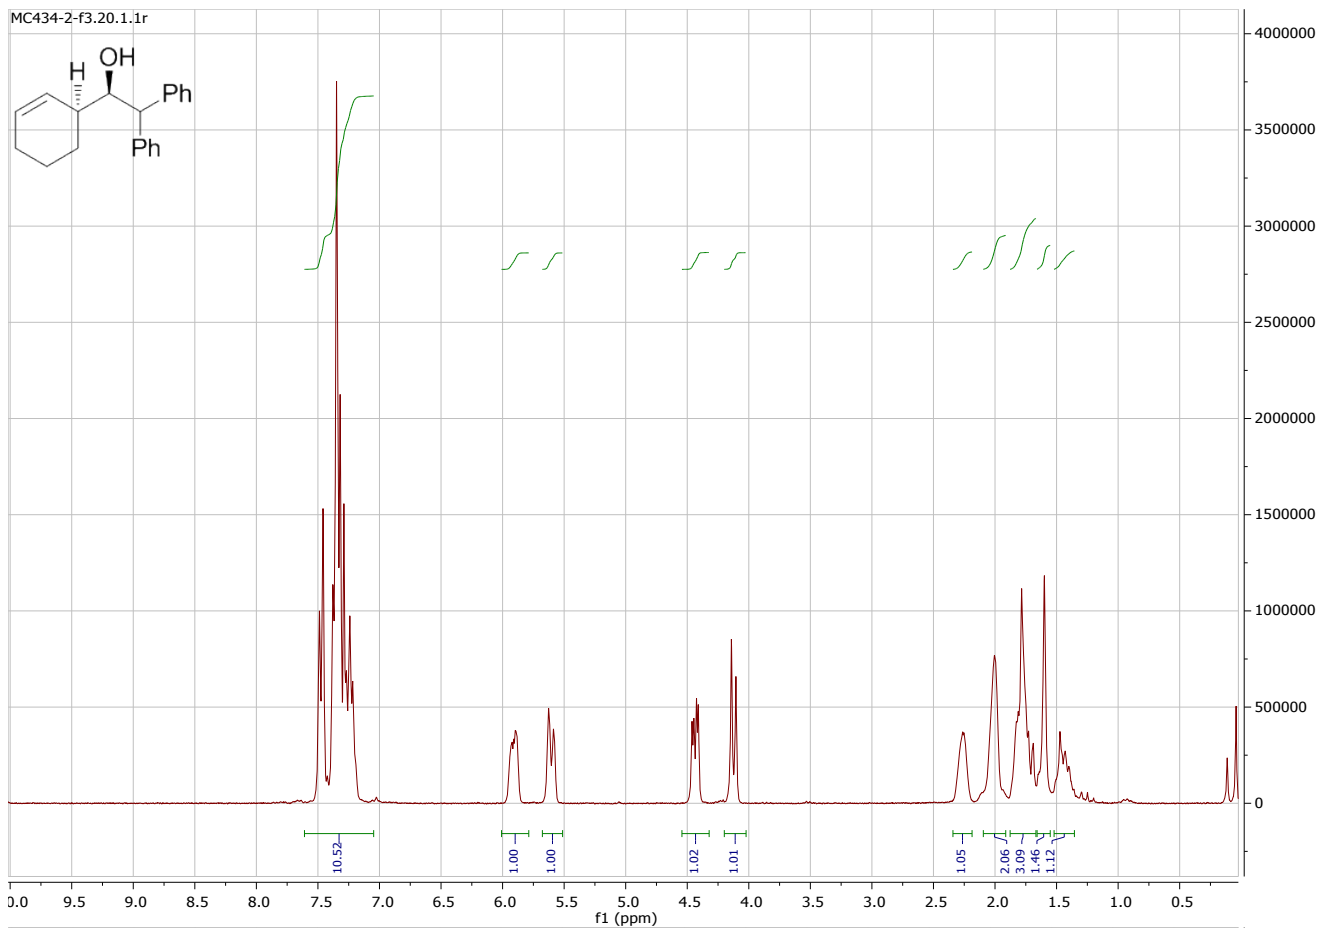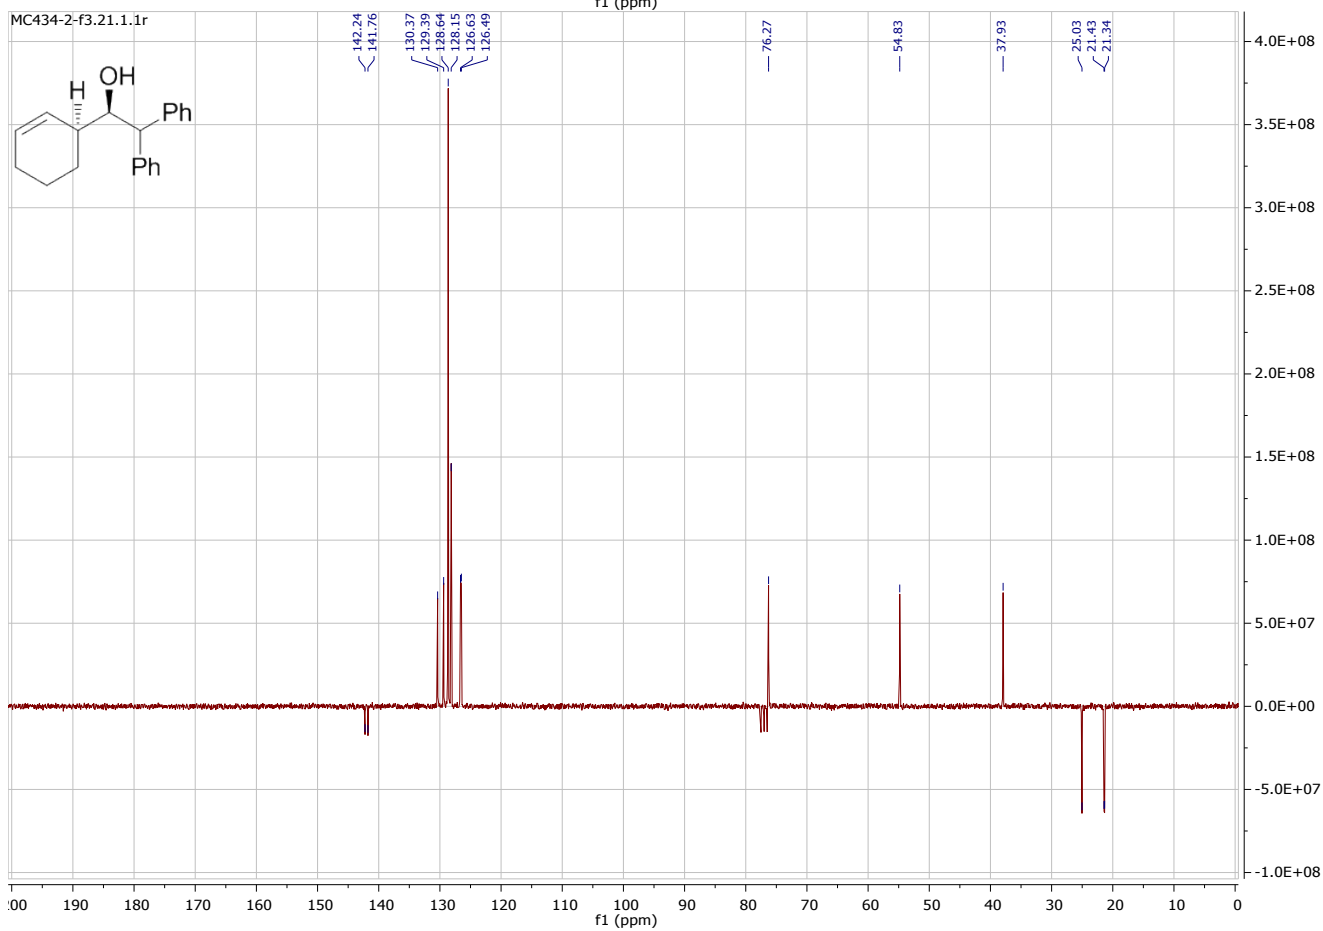

(S)-4-((Tert-Butyldimethylsilyl)oxy)-1-[(S)-cyclohex-2-en-1-yl]butan-1-ol 3k

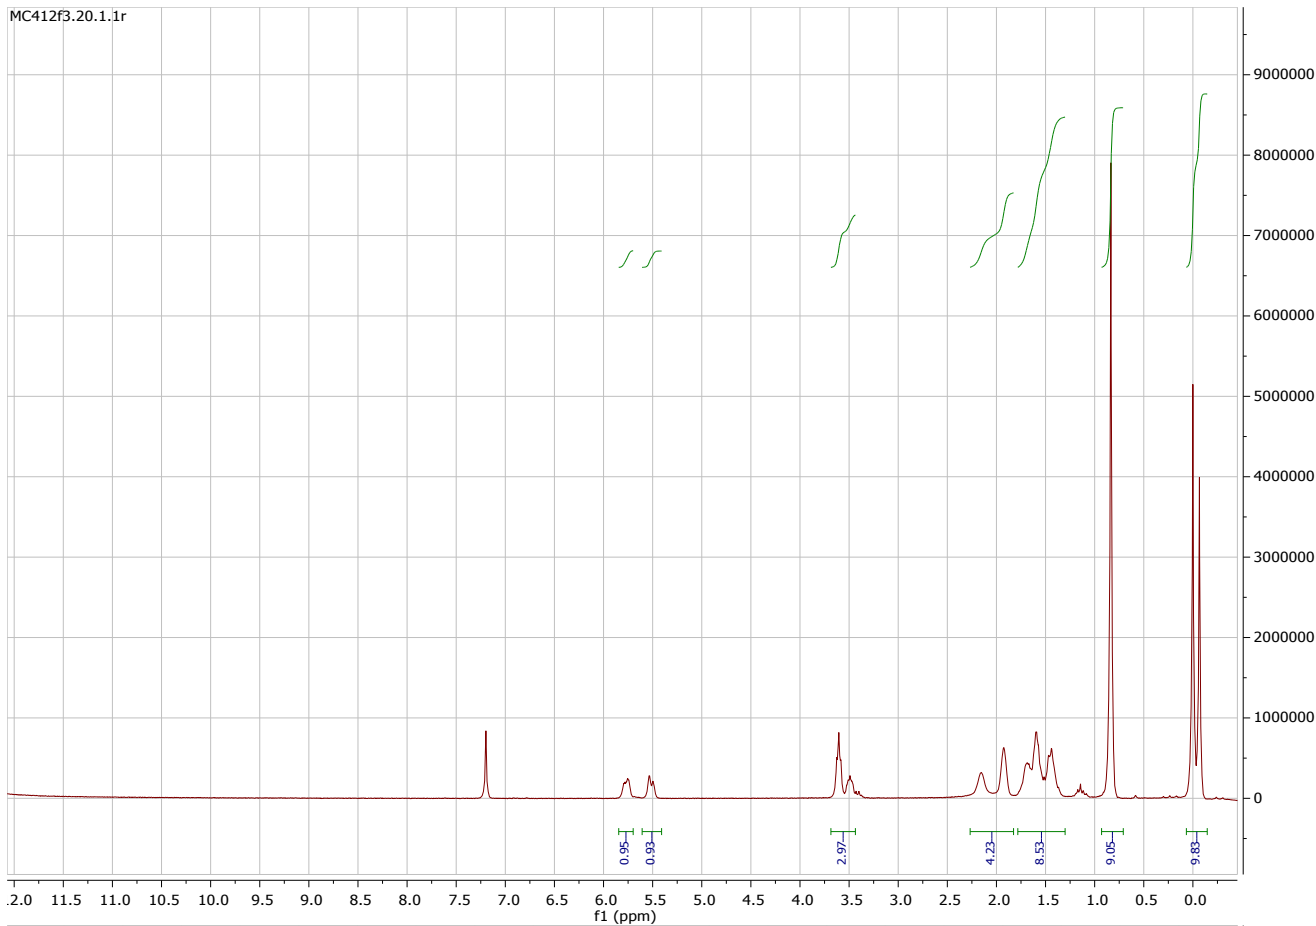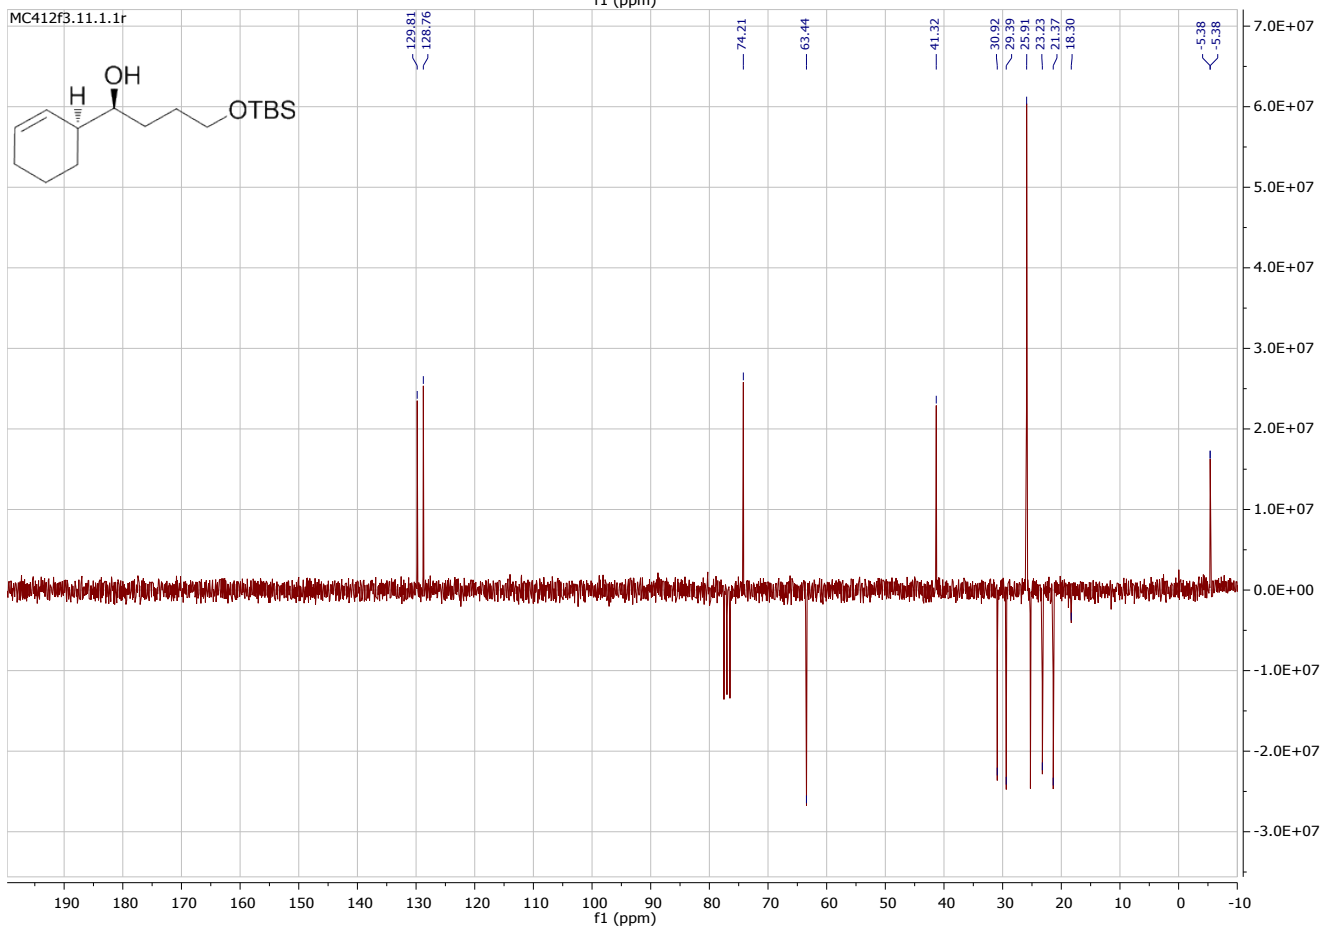

**(S)-1-[(S)-Cyclohex-2-en-1-yl]butane-1,4-diol**

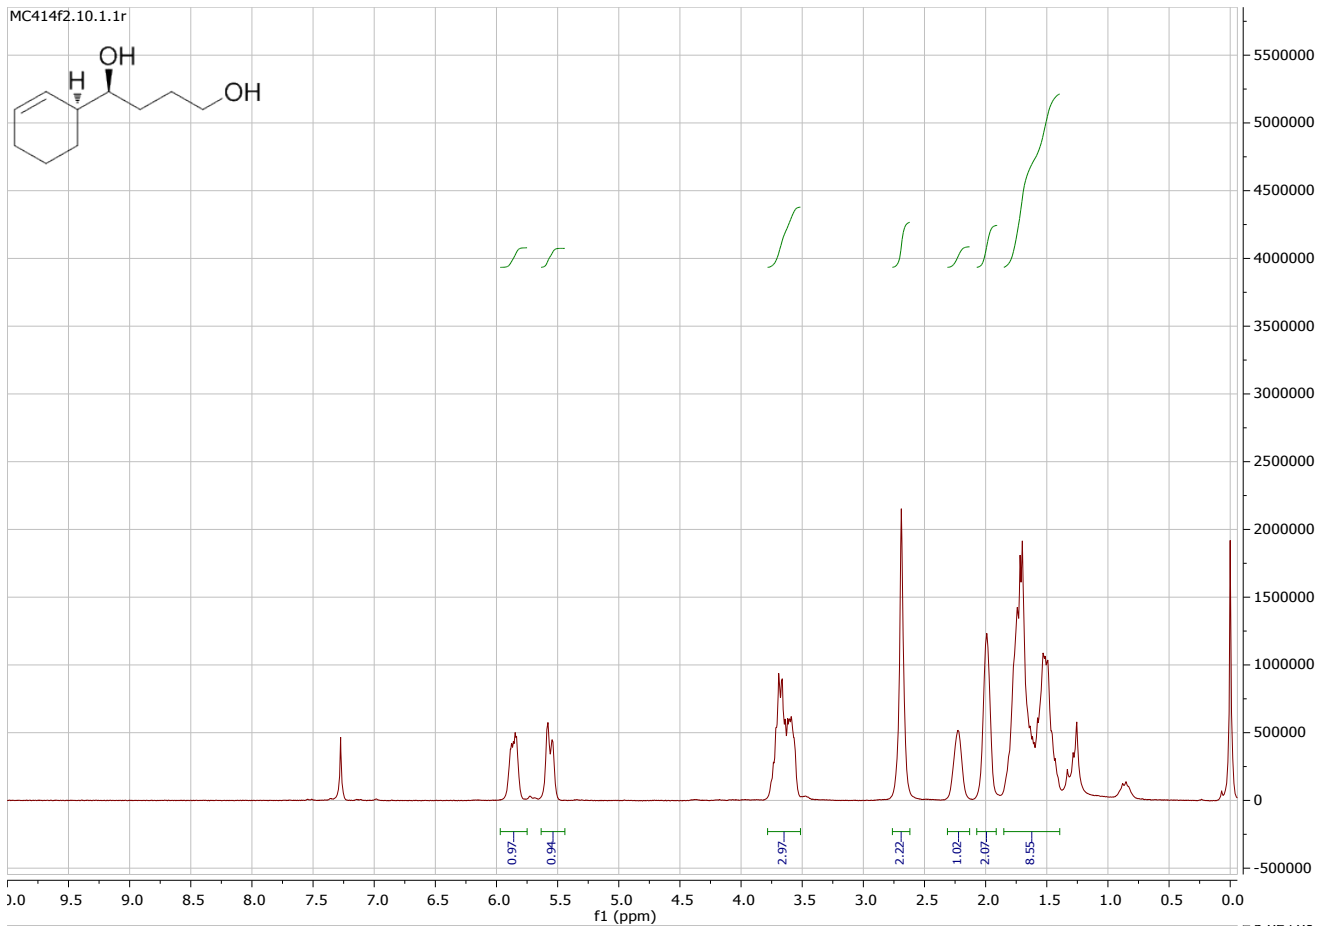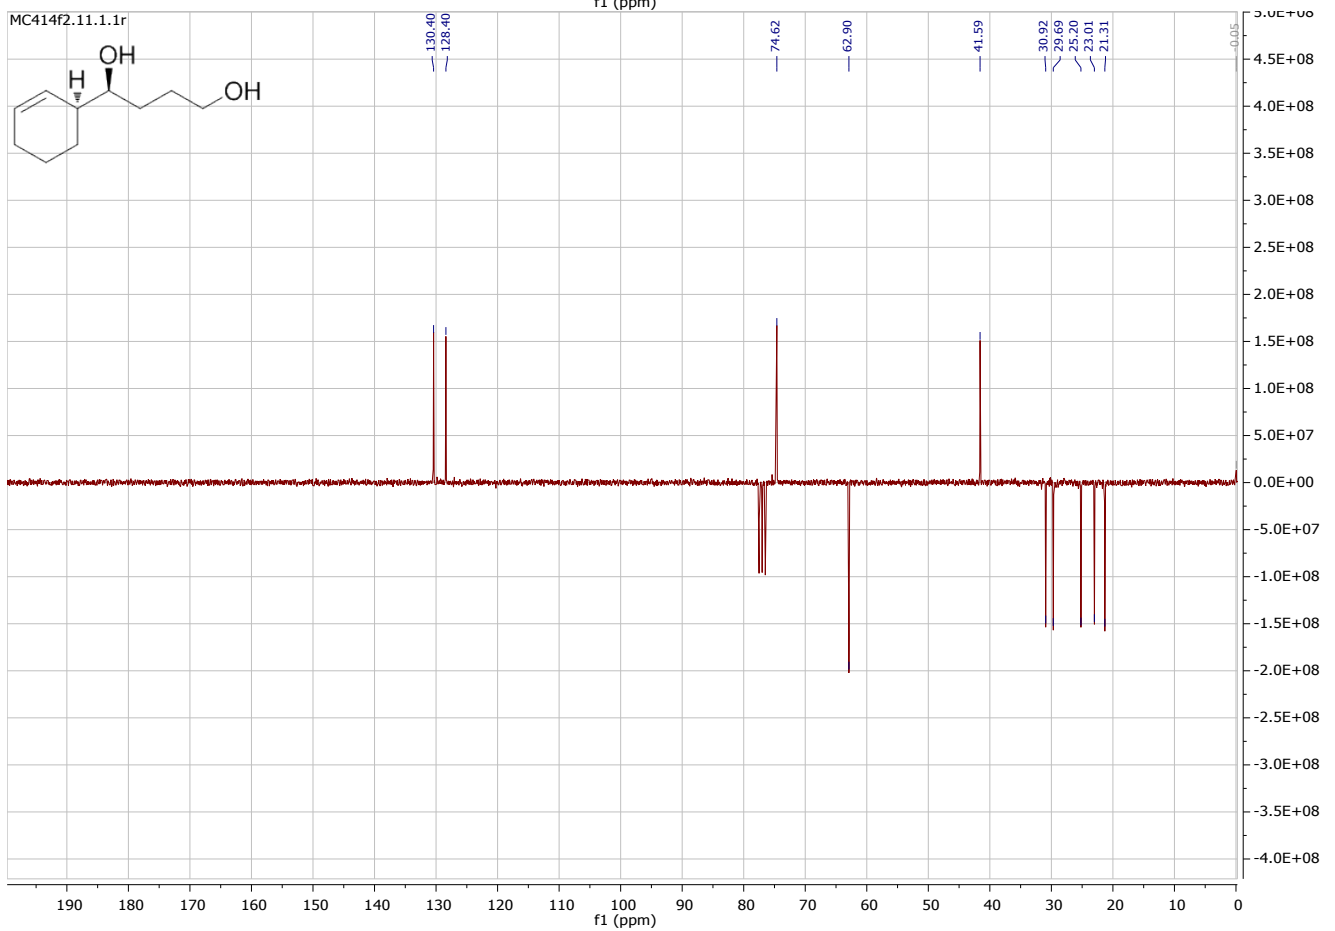

**(R)-[(S)-cyclohex-2-en-1-yl][(R)-2,2-dimethyl-1,3-dioxolan-4-yl]methanol 3l**

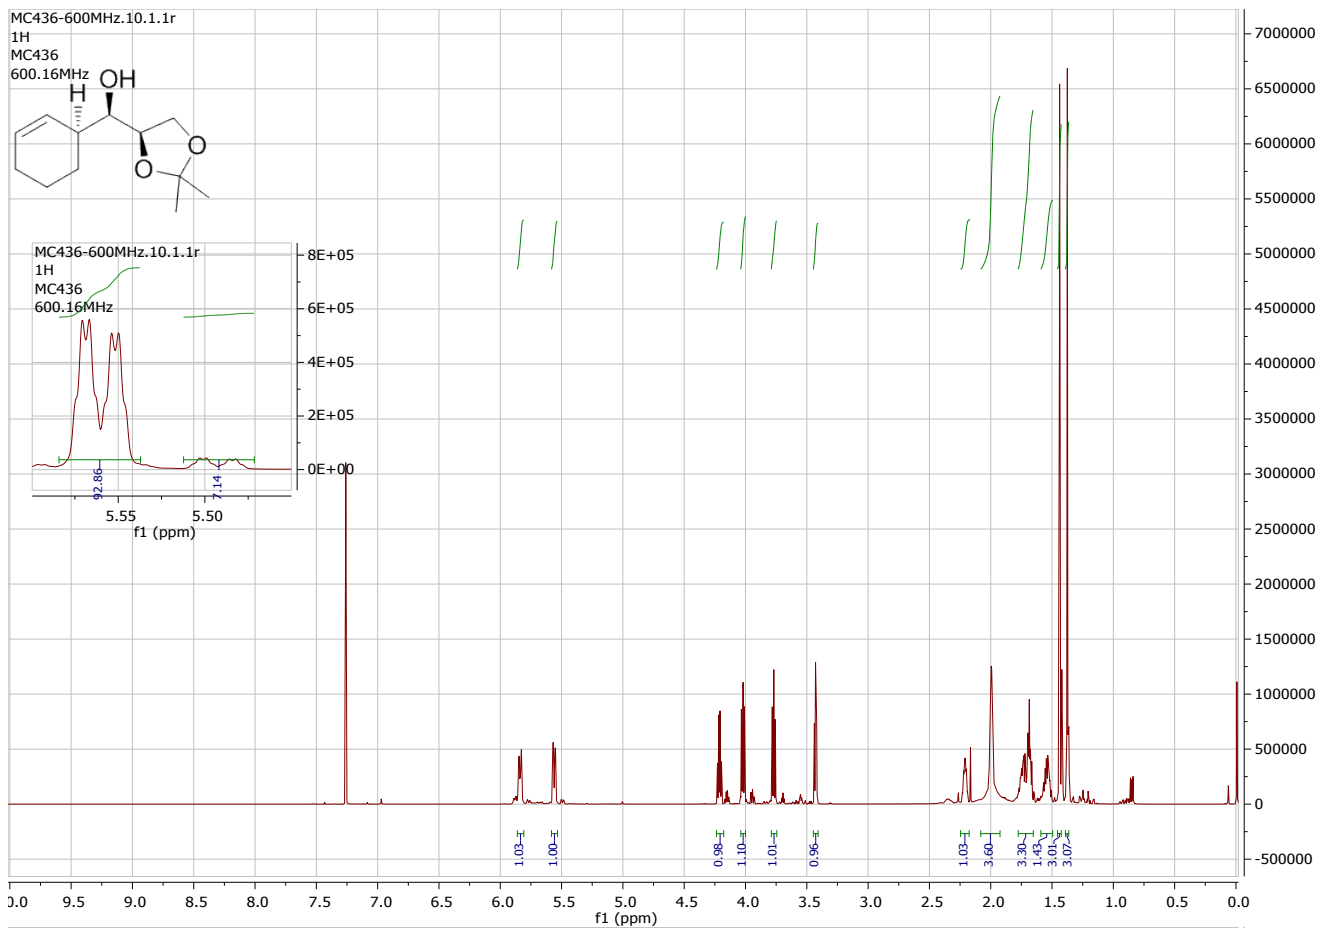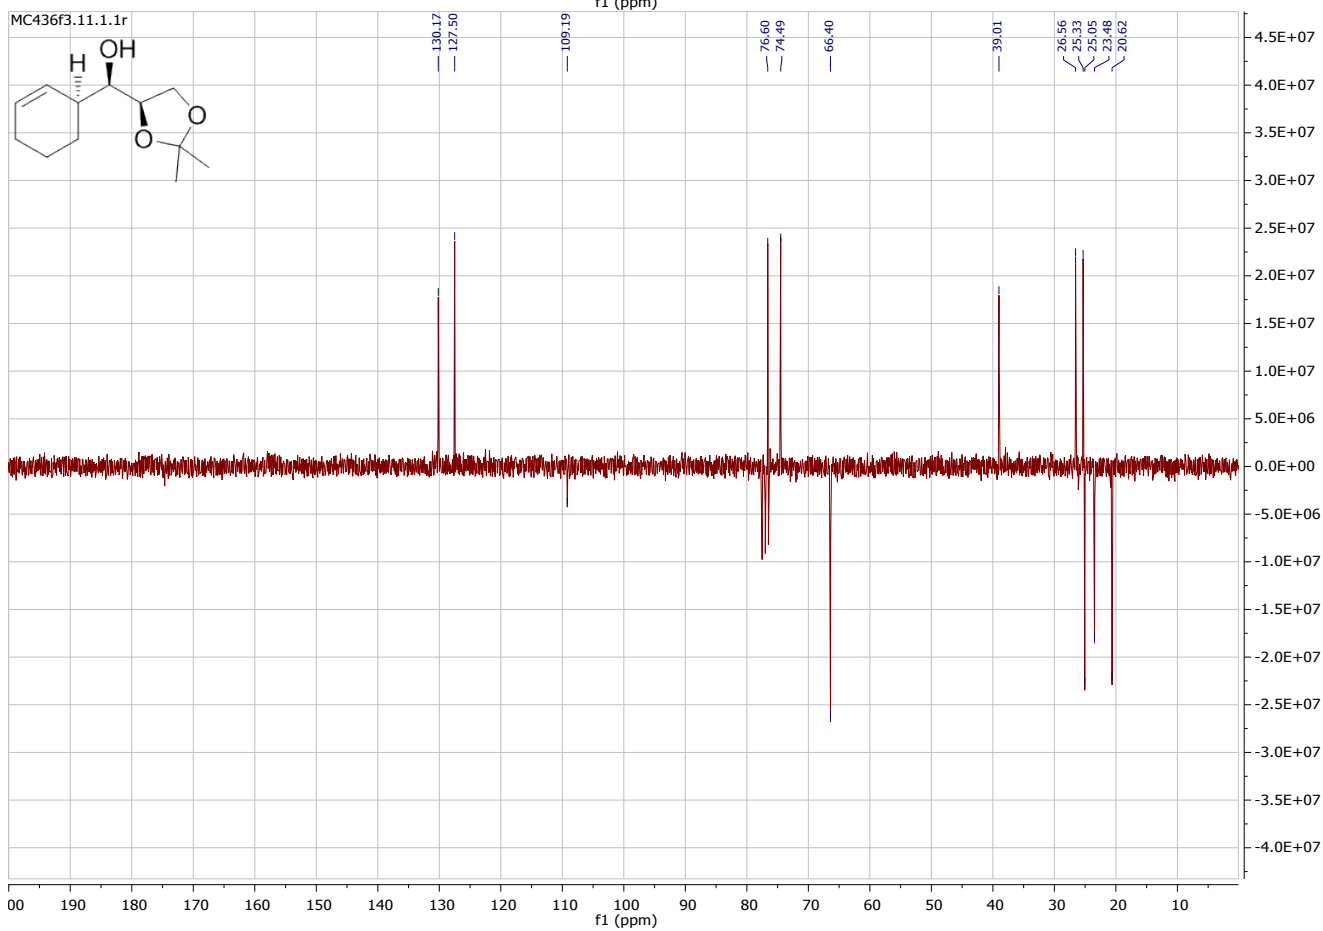

**(S)-[*(R)*-cyclohex-2-en-1-yl][*(R)*-2,2-dimethyl-1,3-dioxolan-4-yl]methanol 3m**

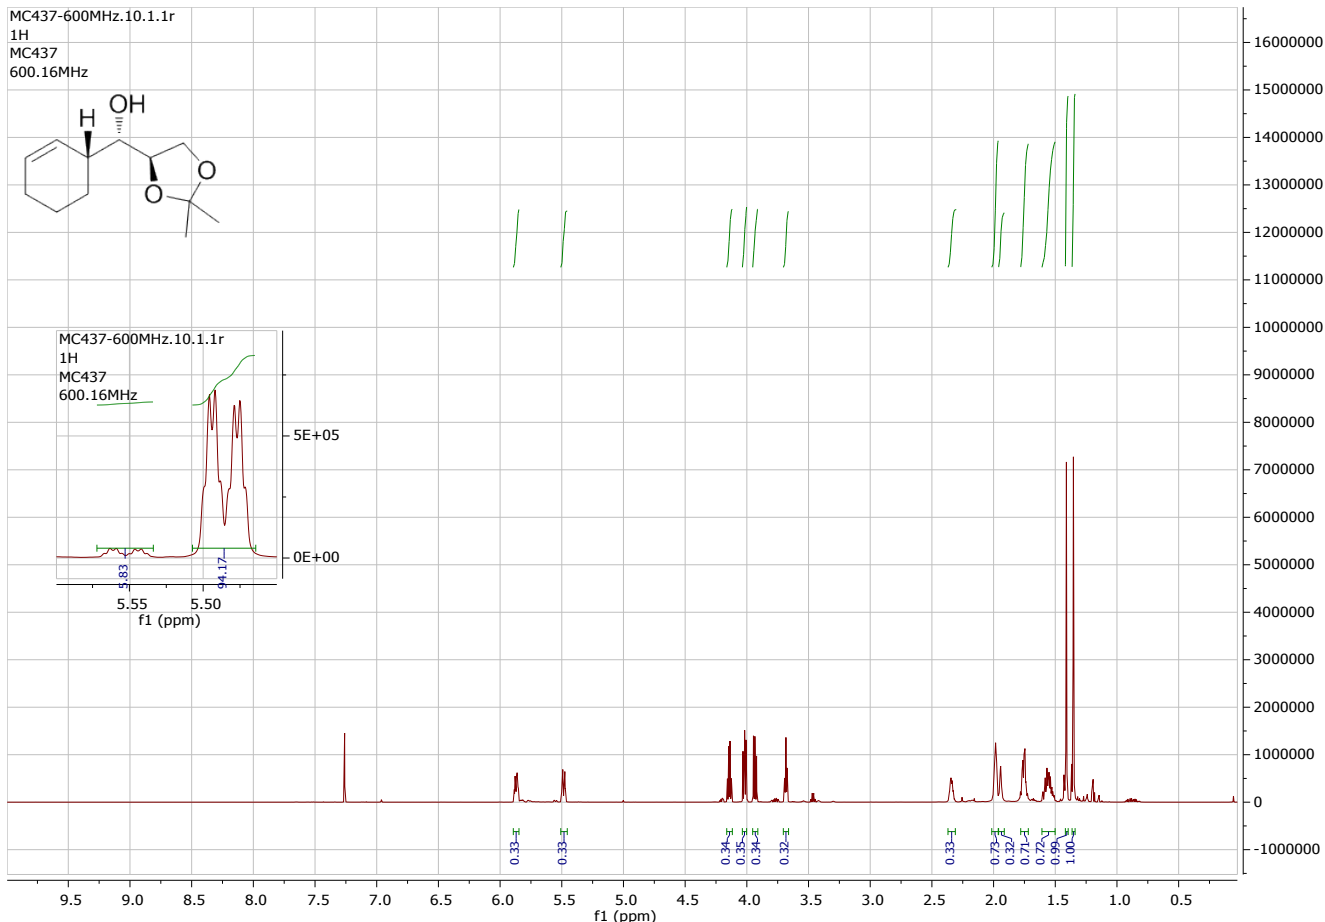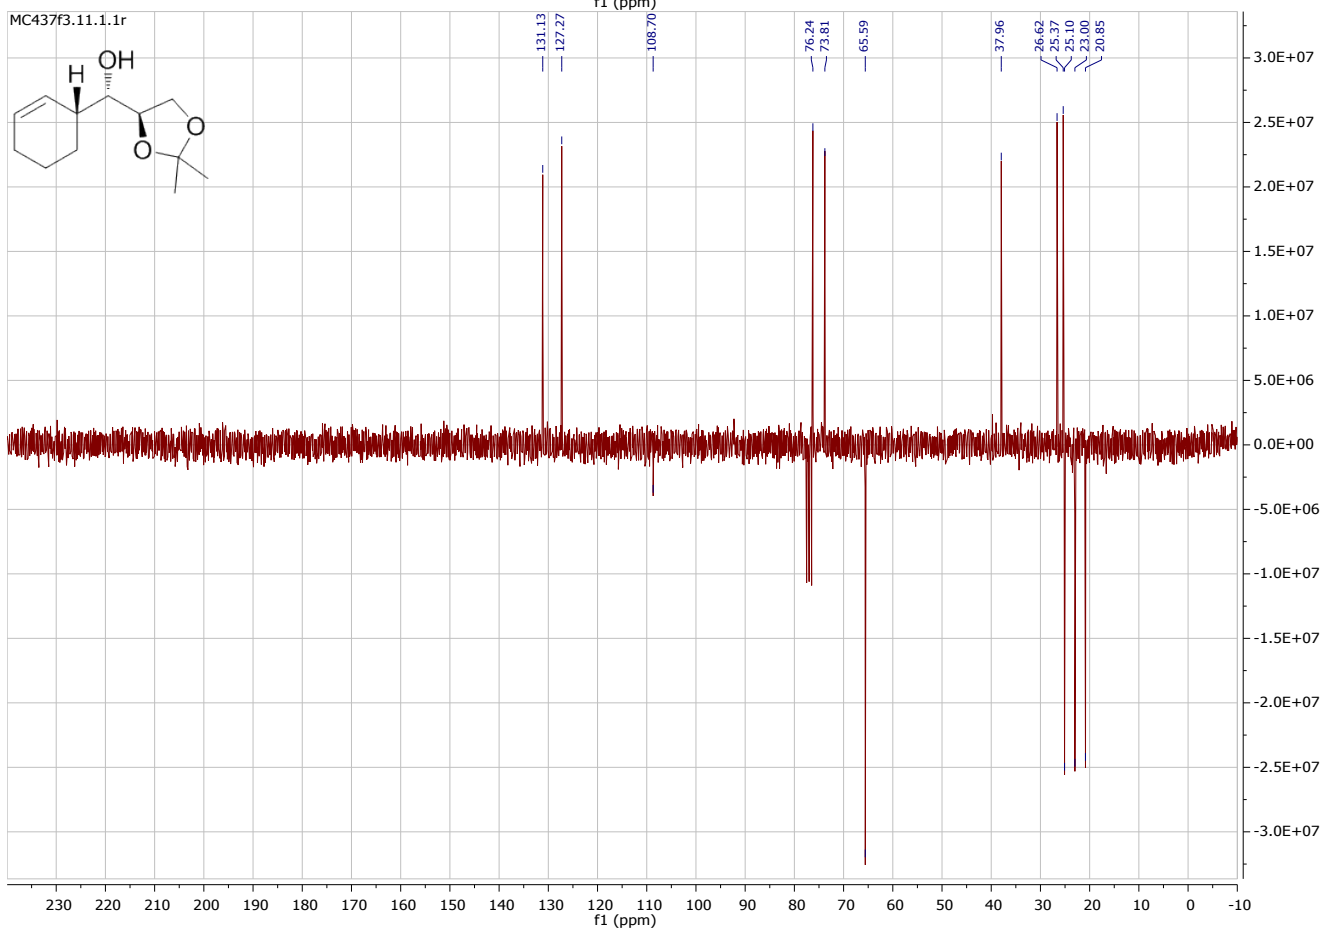

**(R)-1-[(S)-Cyclohex-2-en-1-yl]-1-(o-tolyl)ethanol 3n**

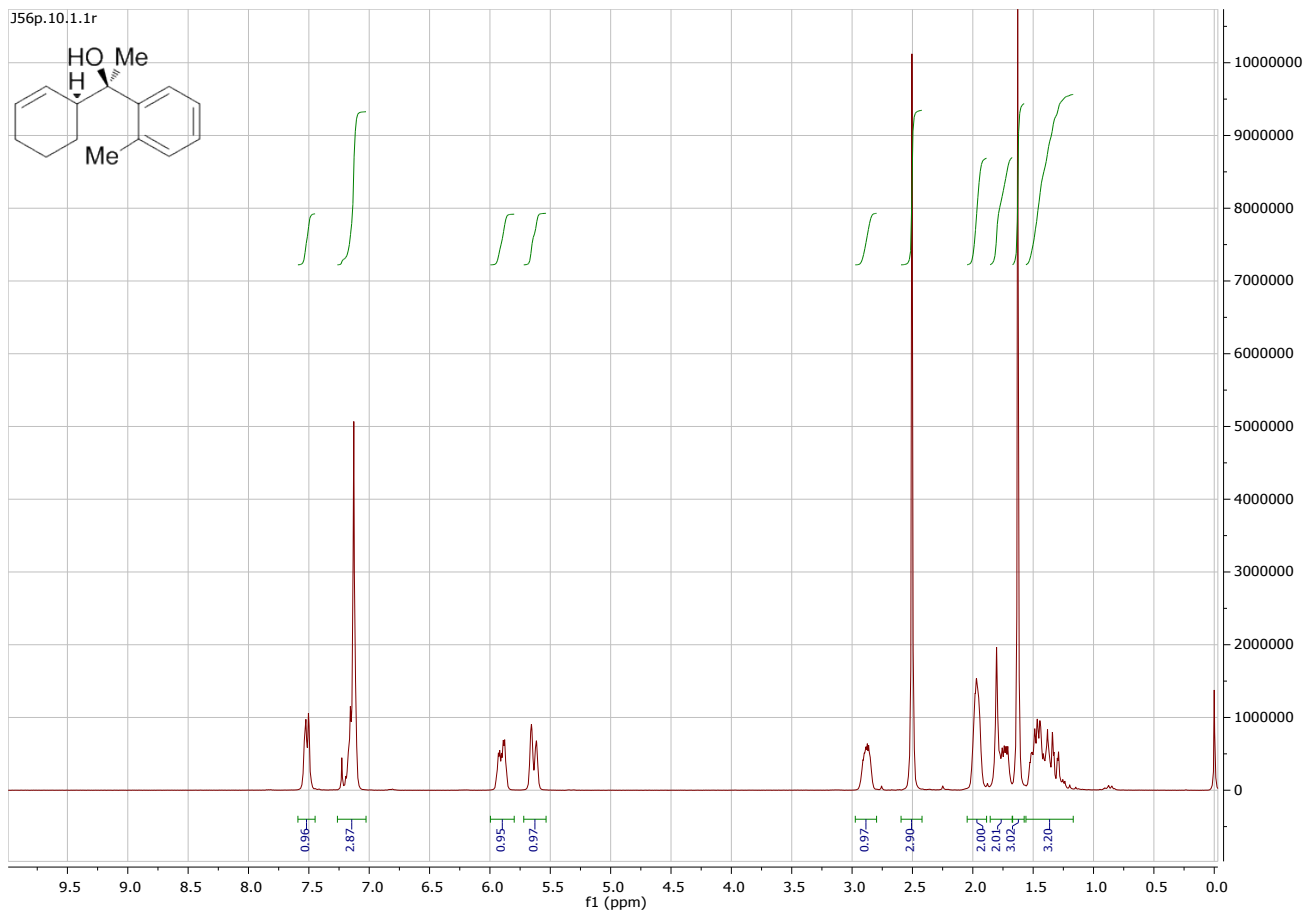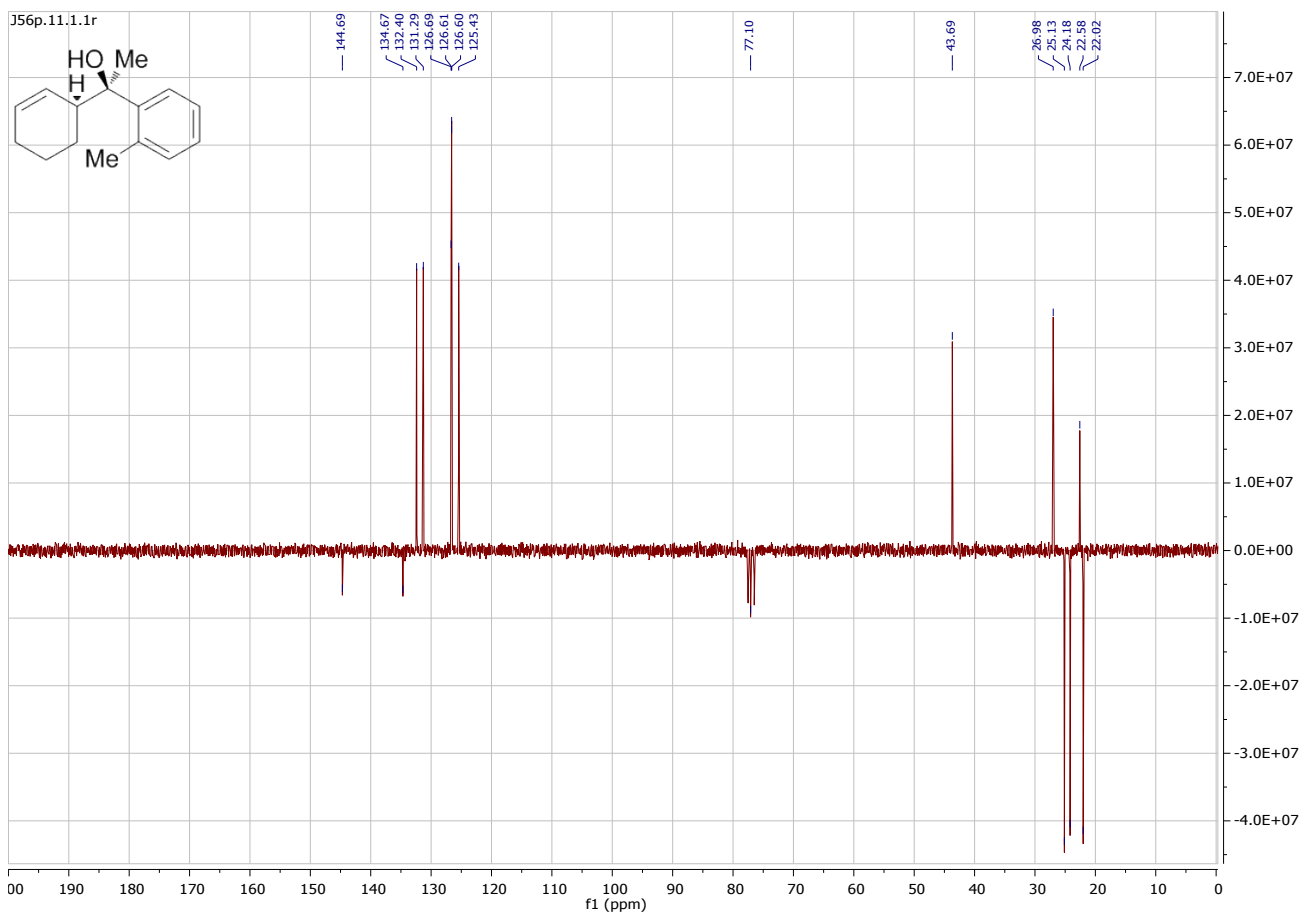

**(R)-1-[(S)-cyclohex-2-en-1-yl]-1,2,3,4-tetrahydronaphthalen-1-ol 3o**



J57p.10.1.1r

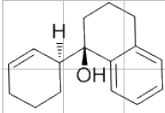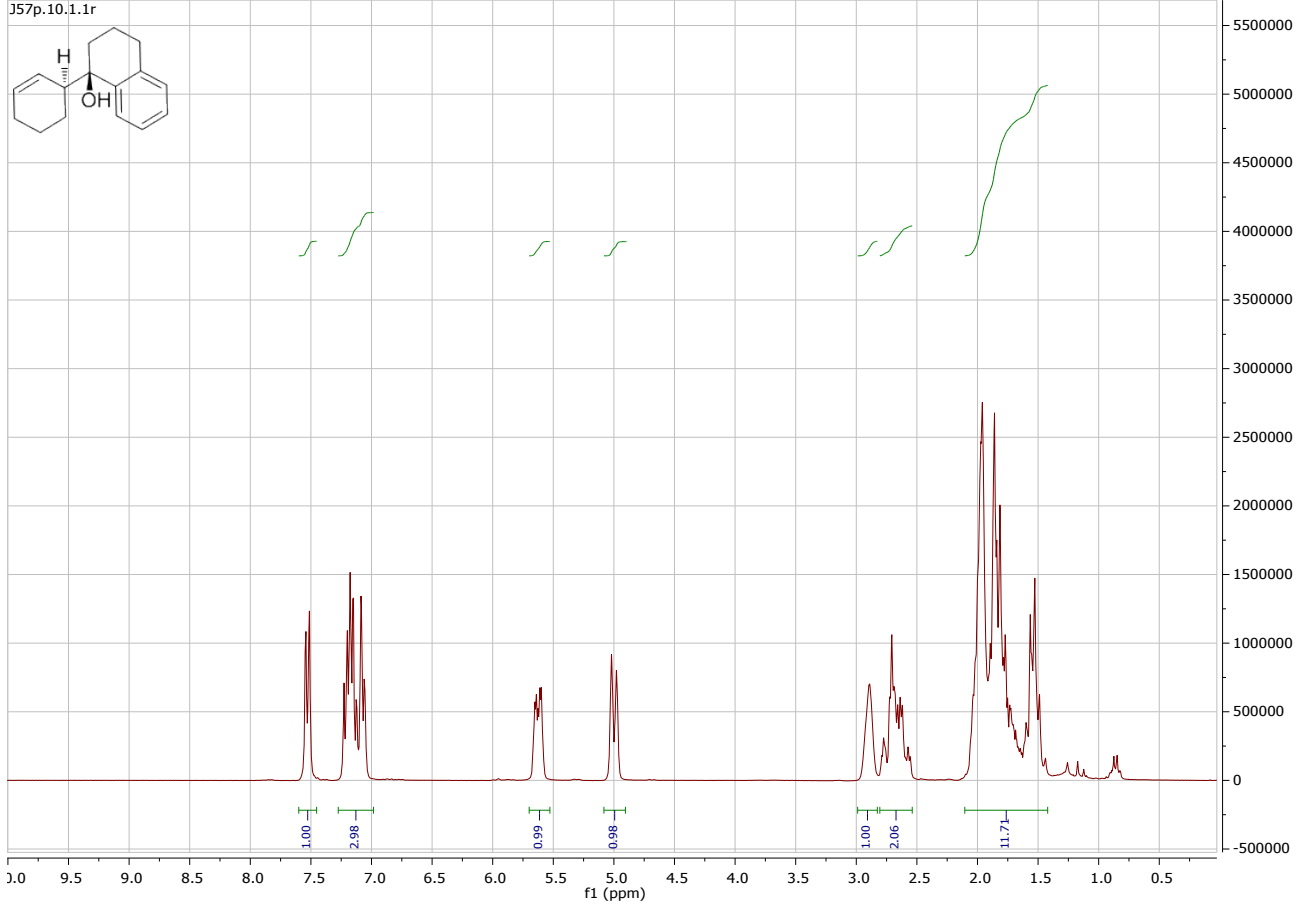

J57p.11.1.1r

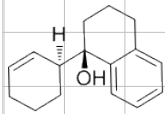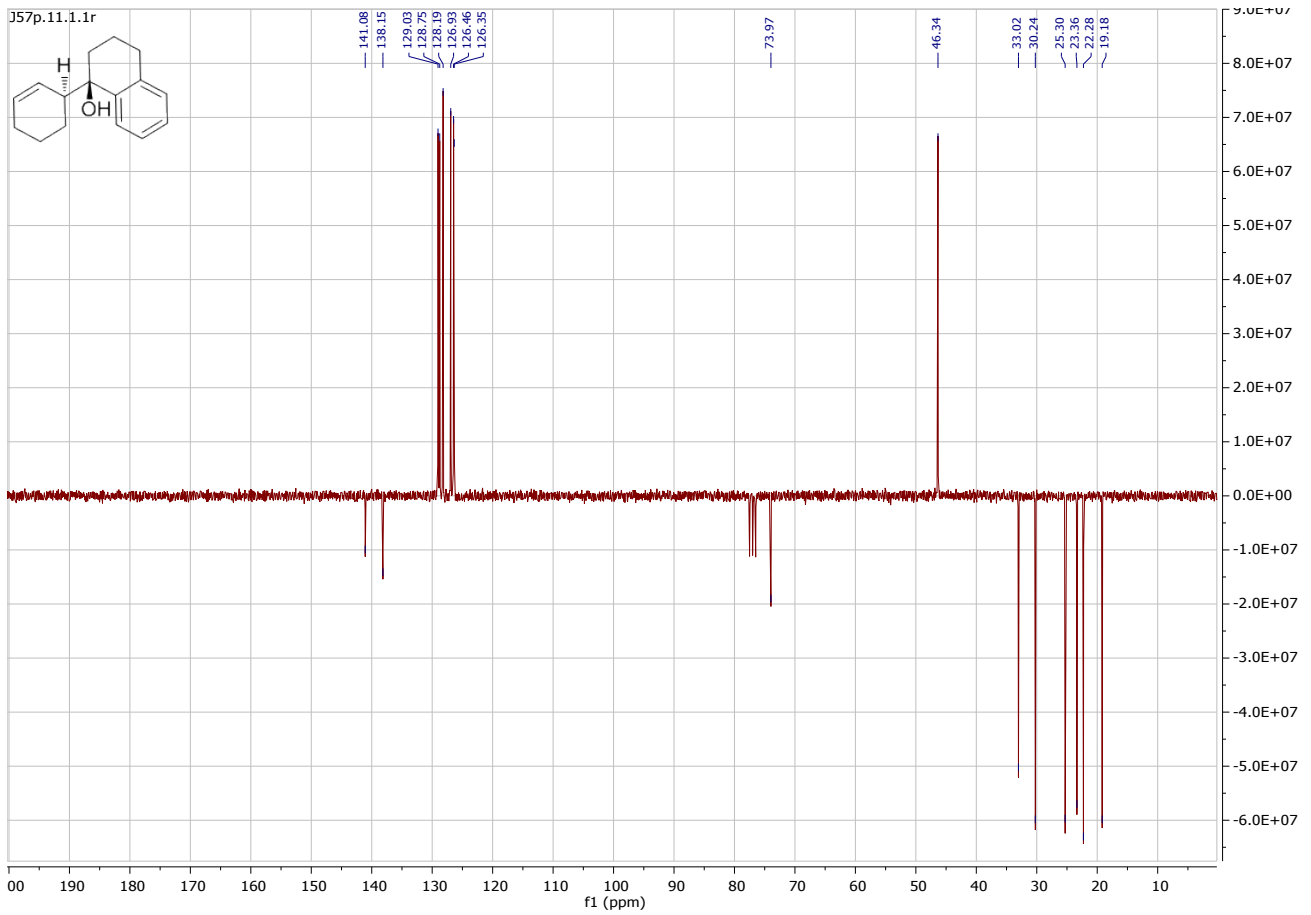

**(R)-1-[(S)-cyclohex-2-en-1-yl]-1-phenyl-4-(trityloxy)but-2-yn-1-ol 3p**

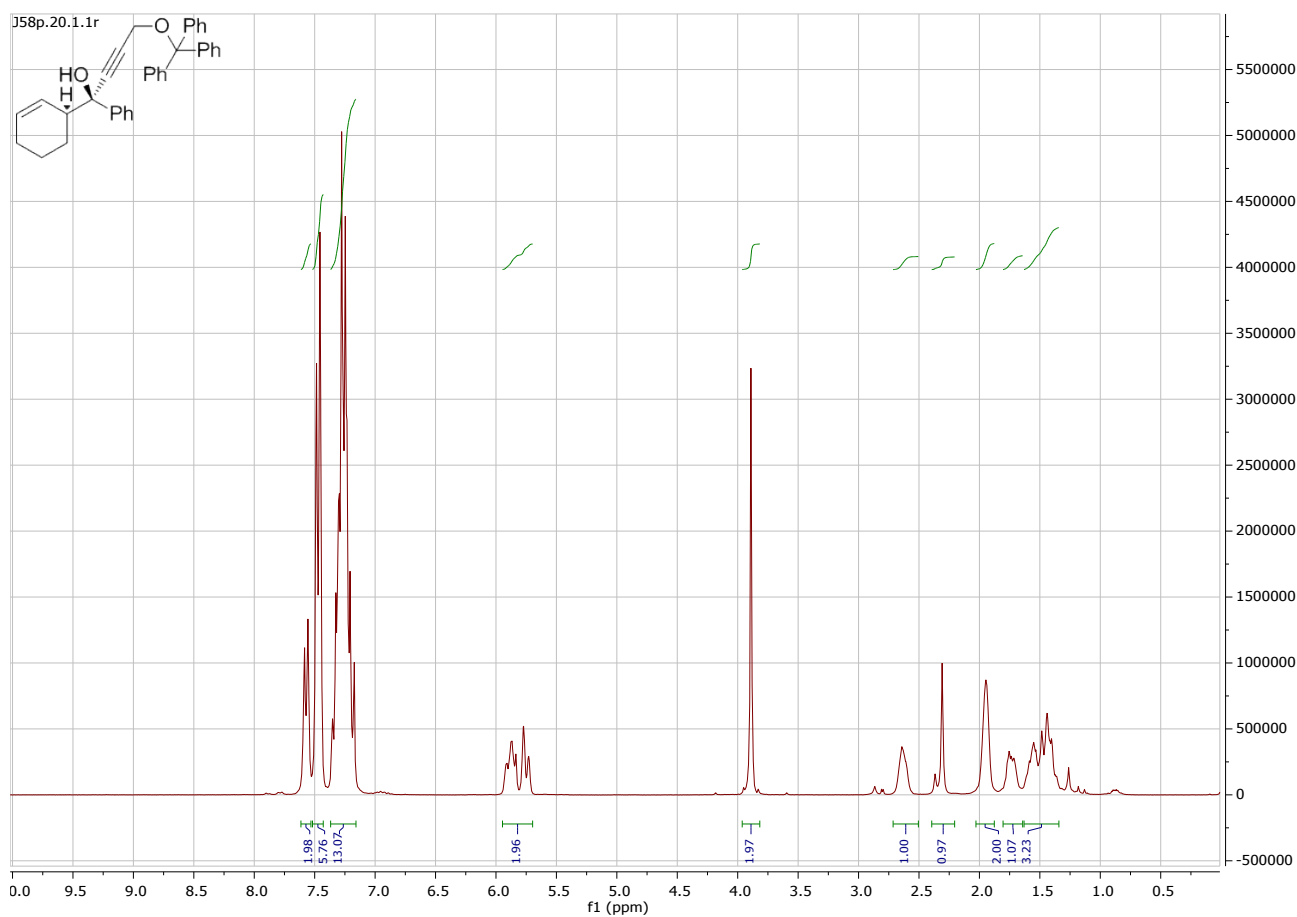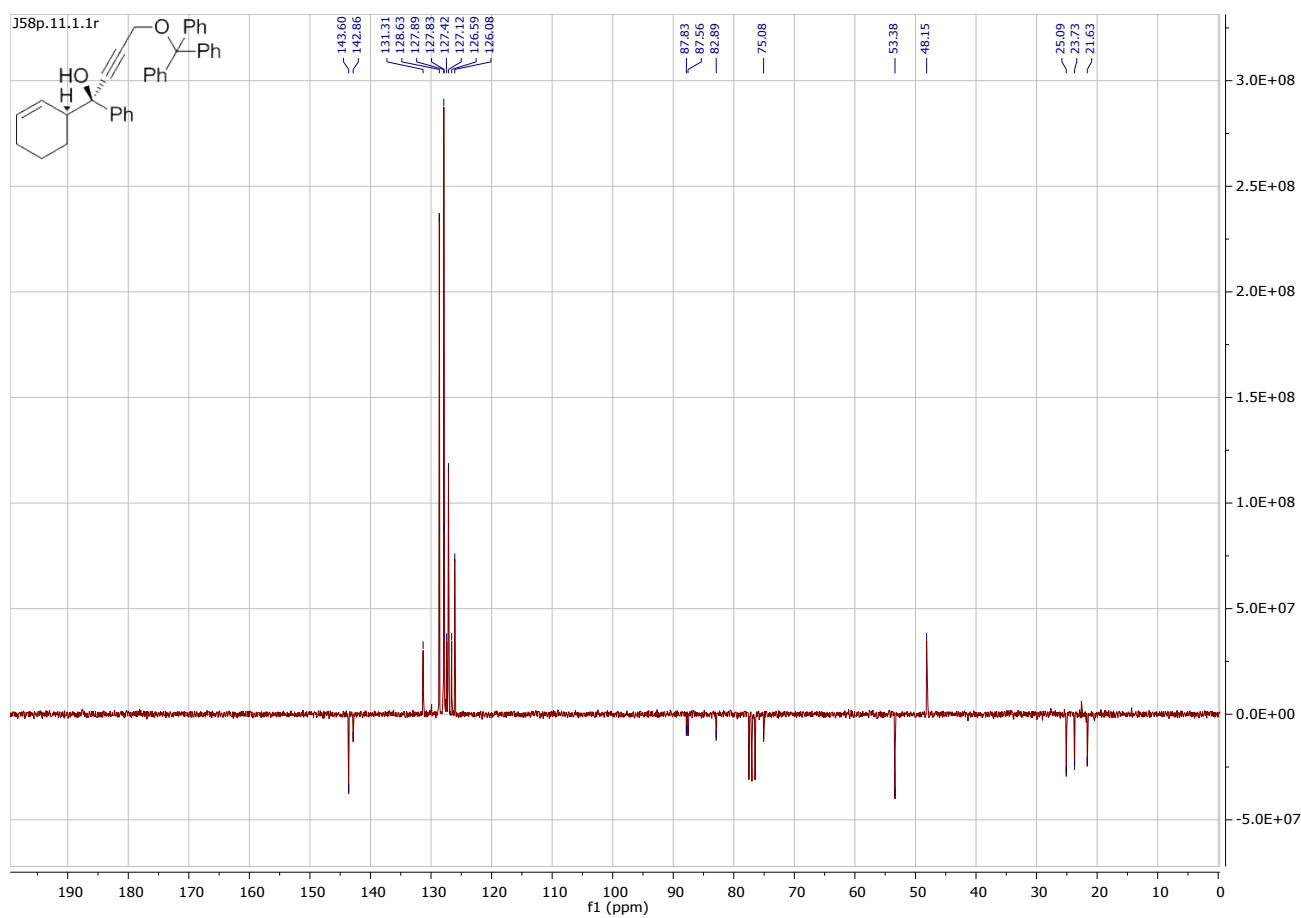

**(S)-Ethyl 1',2',3',4'-tetrahydro-[1,1'-biphenyl]-2-carboxylate 5a.**

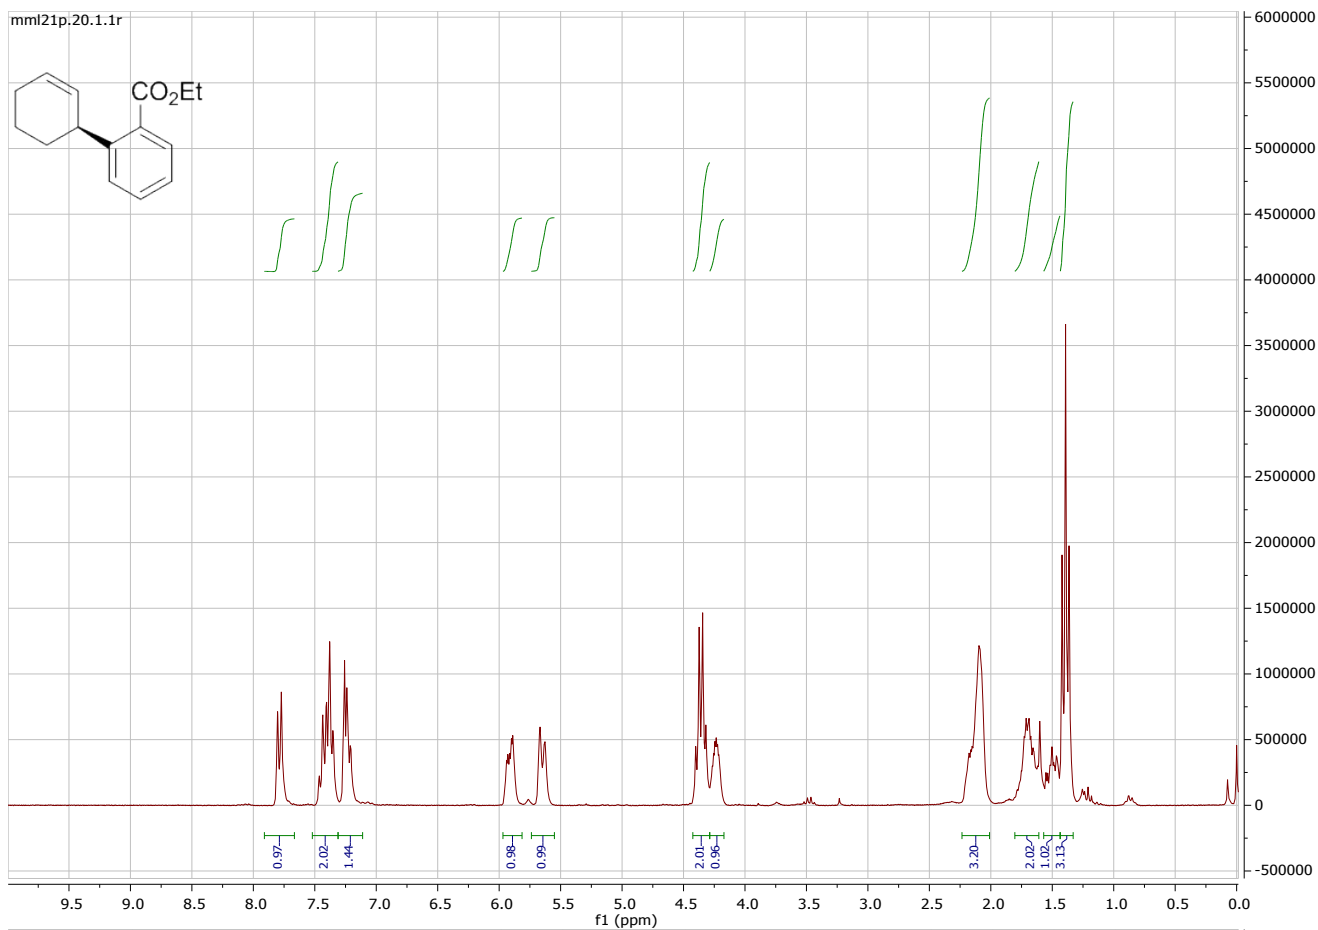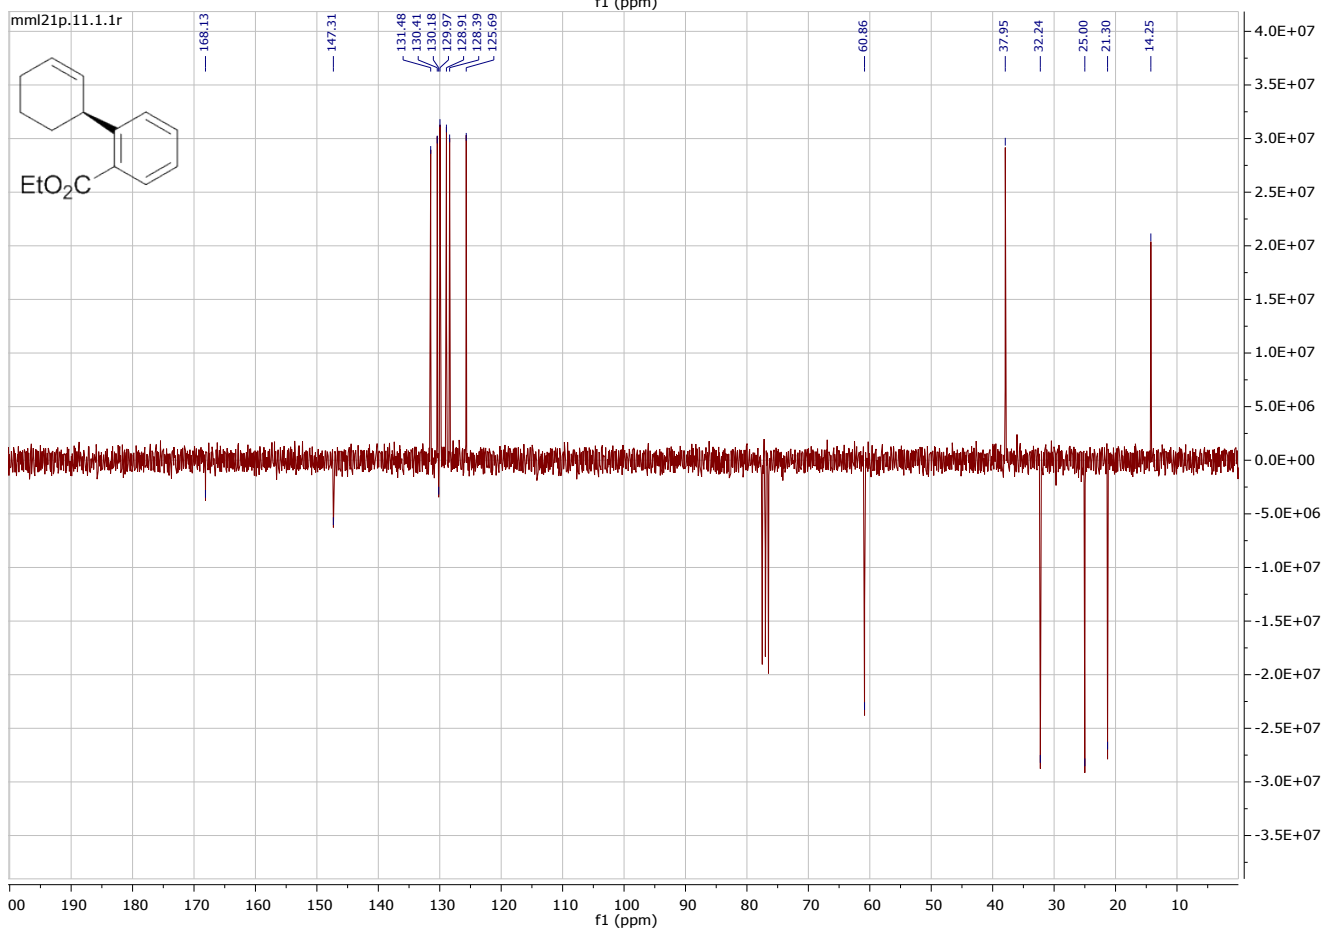

**(S)-Ethyl 1',2',3',4'-tetrahydro-[1,1'-biphenyl]-4-carboxylate 5b**

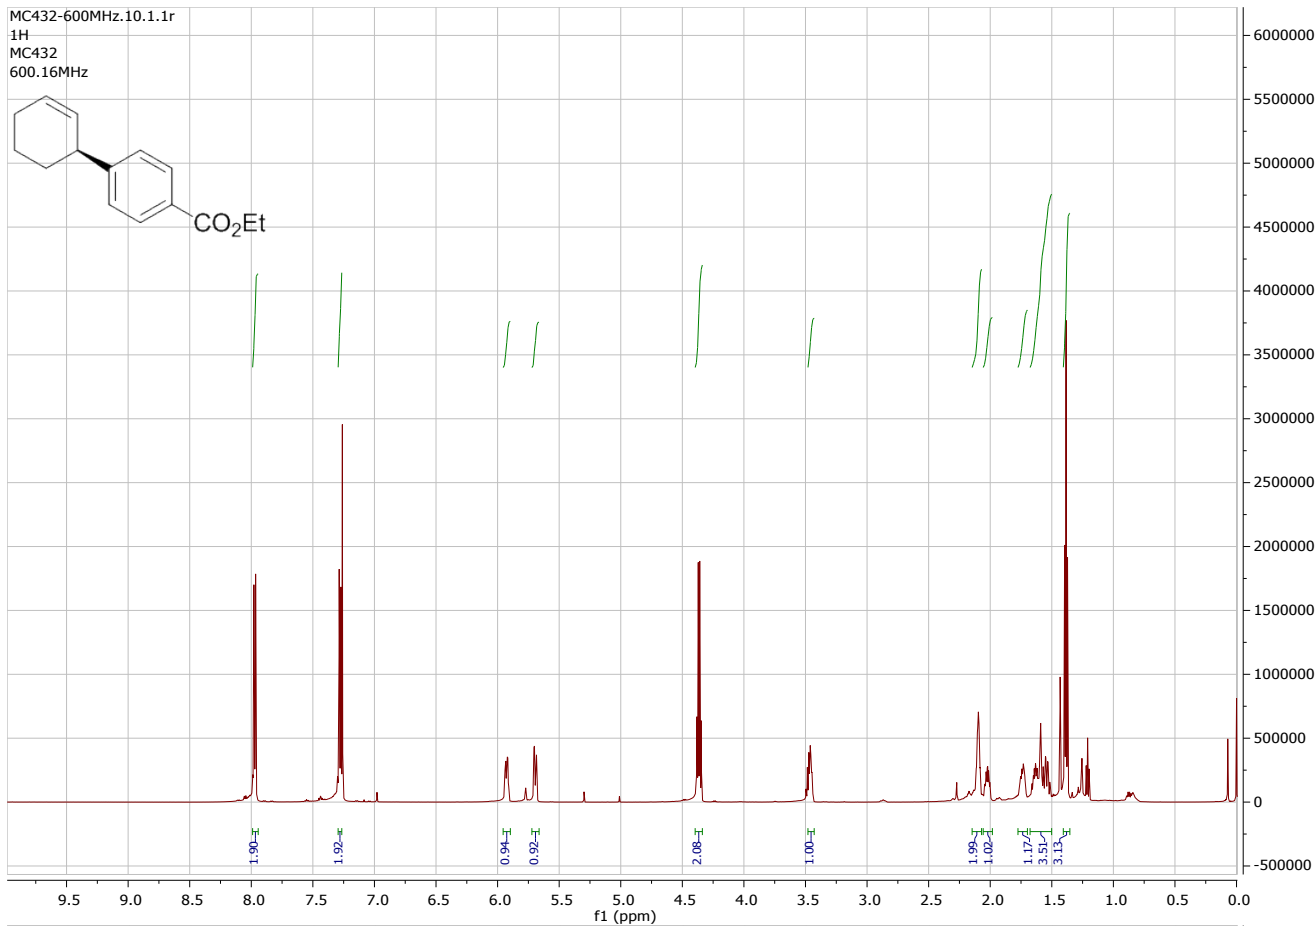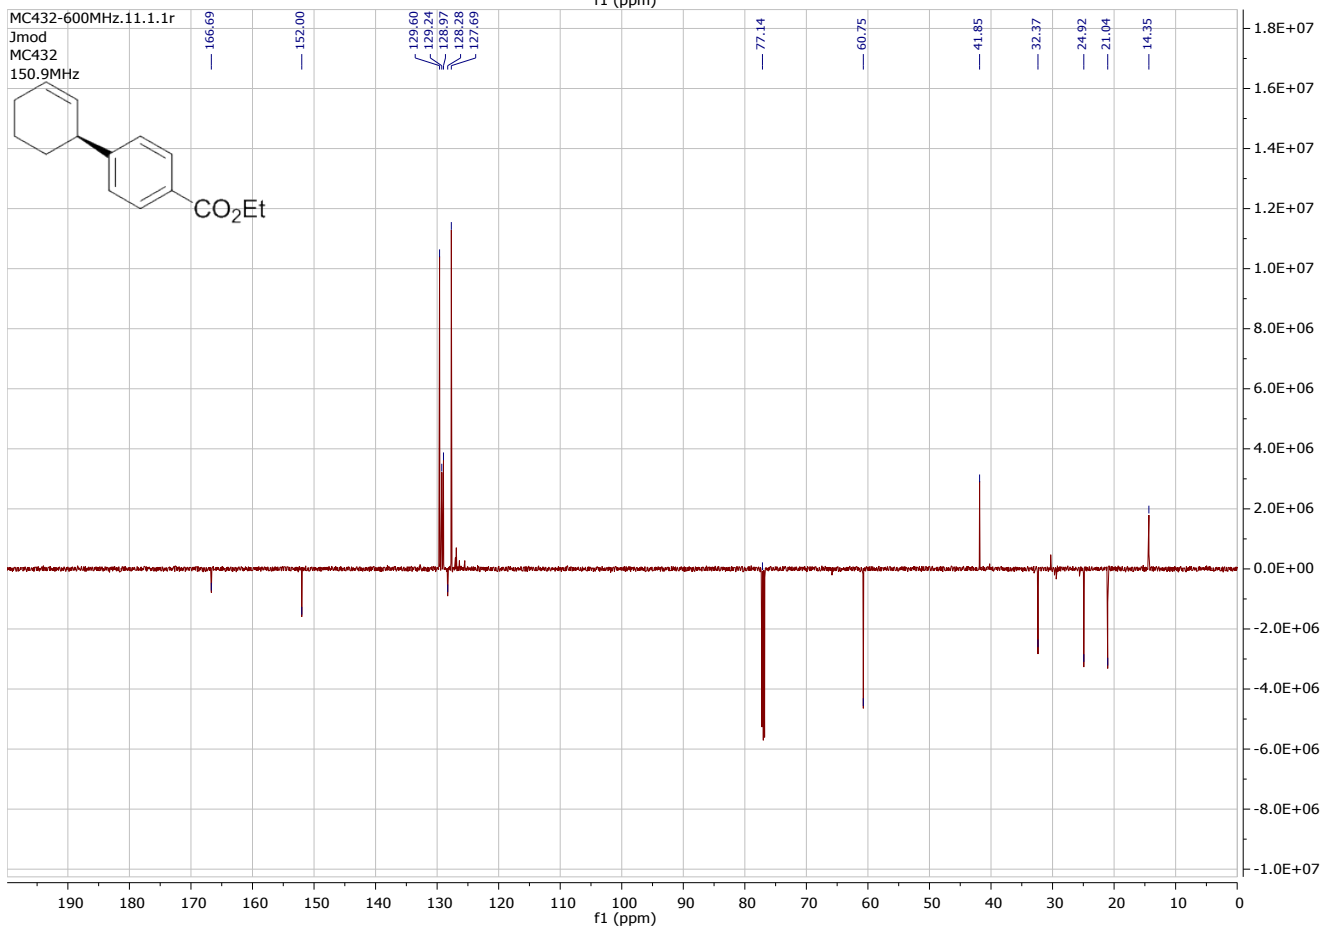

(S)-2-(Cyclohex-2-en-1-yl)pyridine 5c.

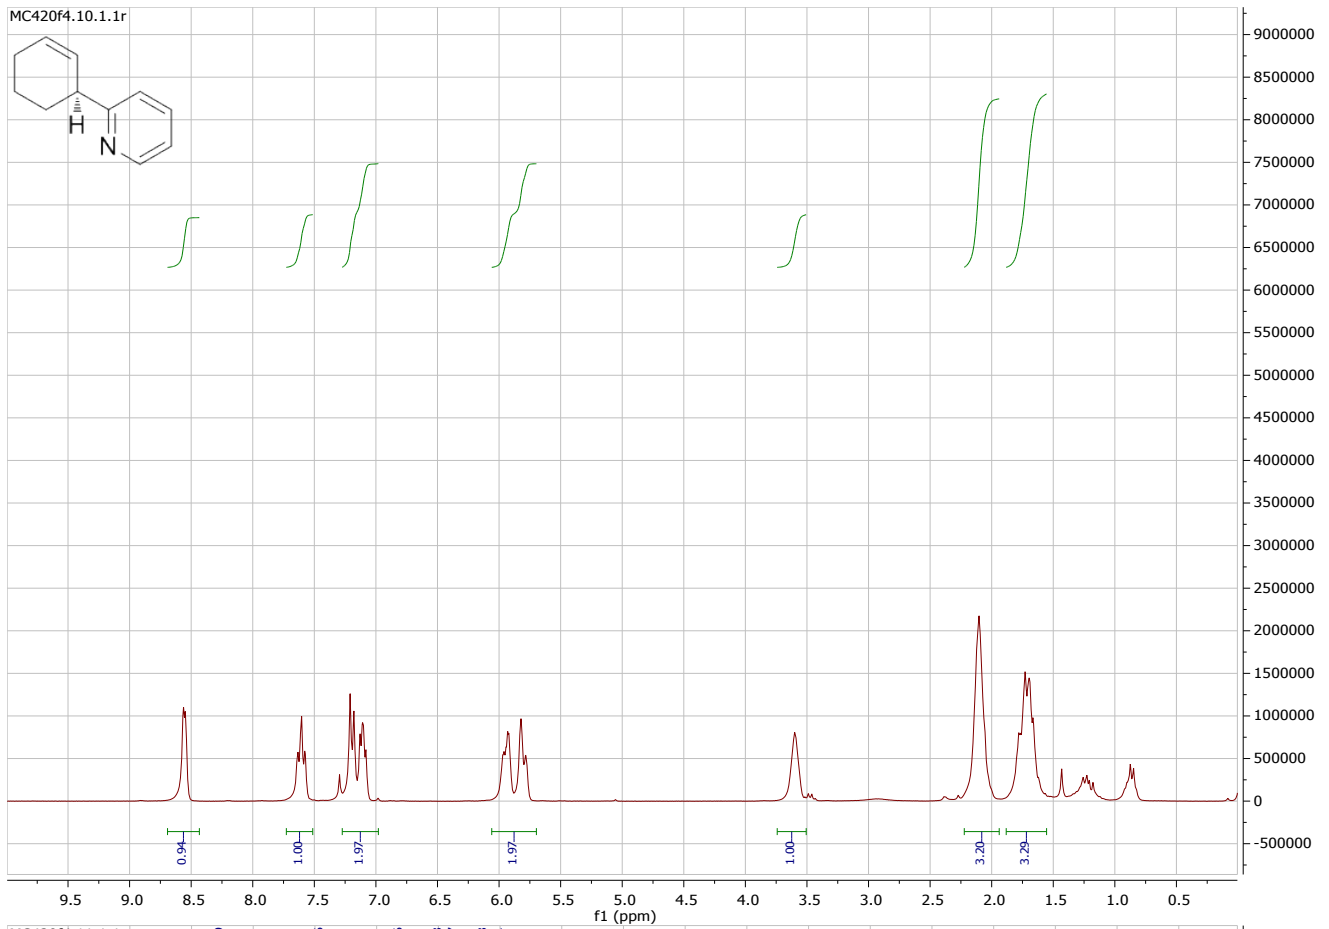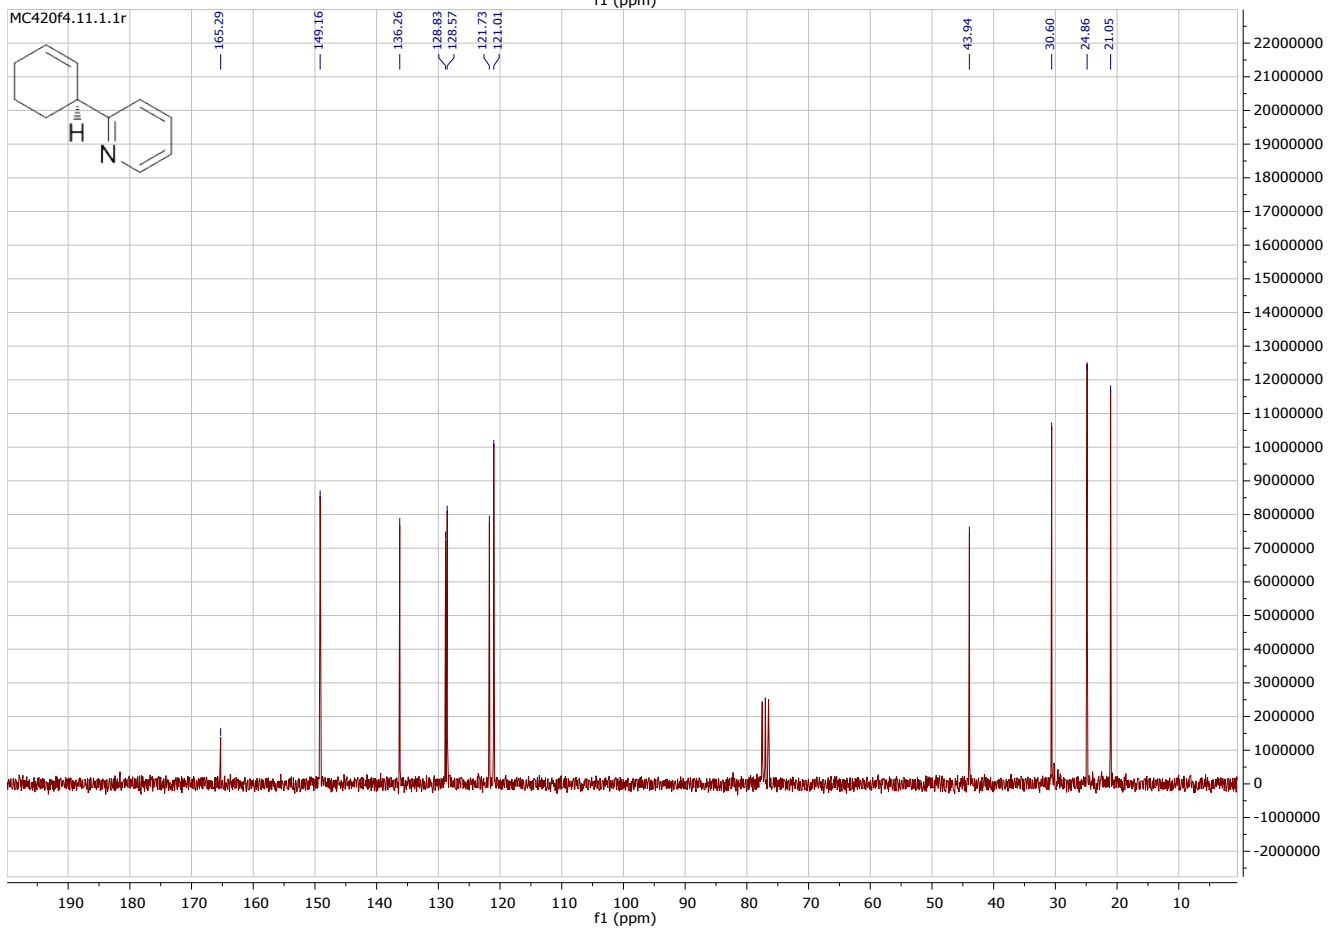

(S)-(1',2',3',4'-Tetrahydro-[1,1'-biphenyl]-2-yl)methanol 5'a

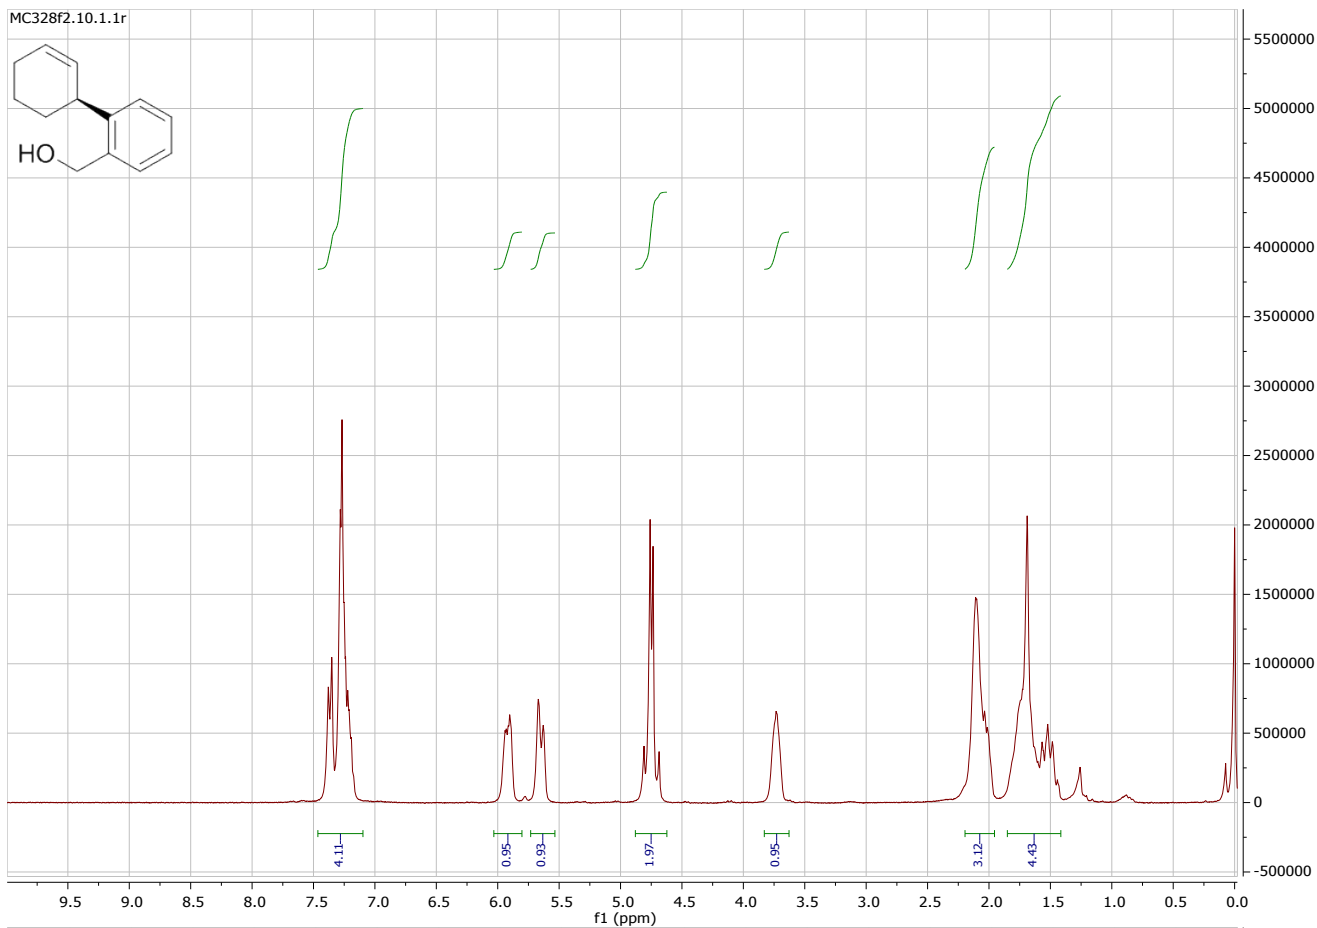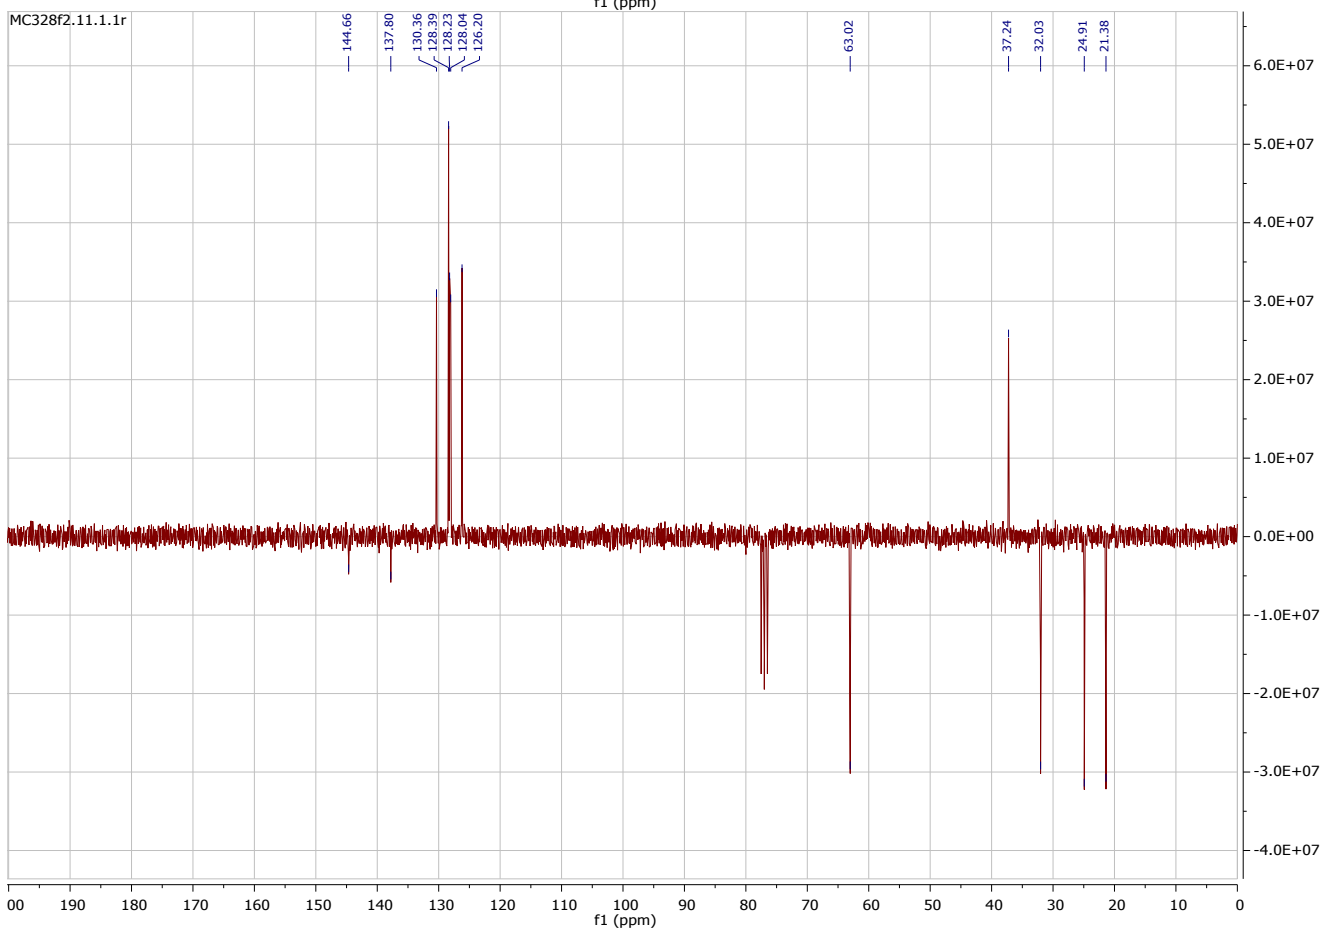

**(R)-[(S)-Cyclopent-2-en-1-yl](phenyl)methanol 4a**

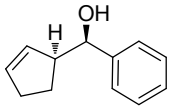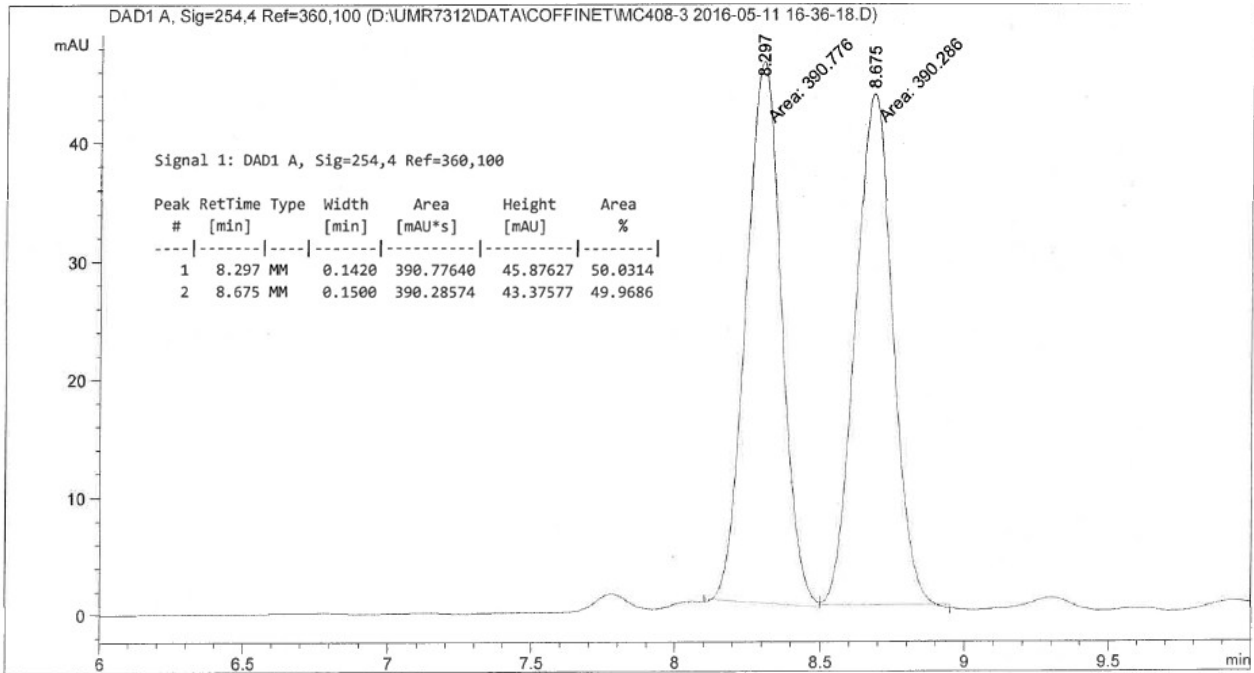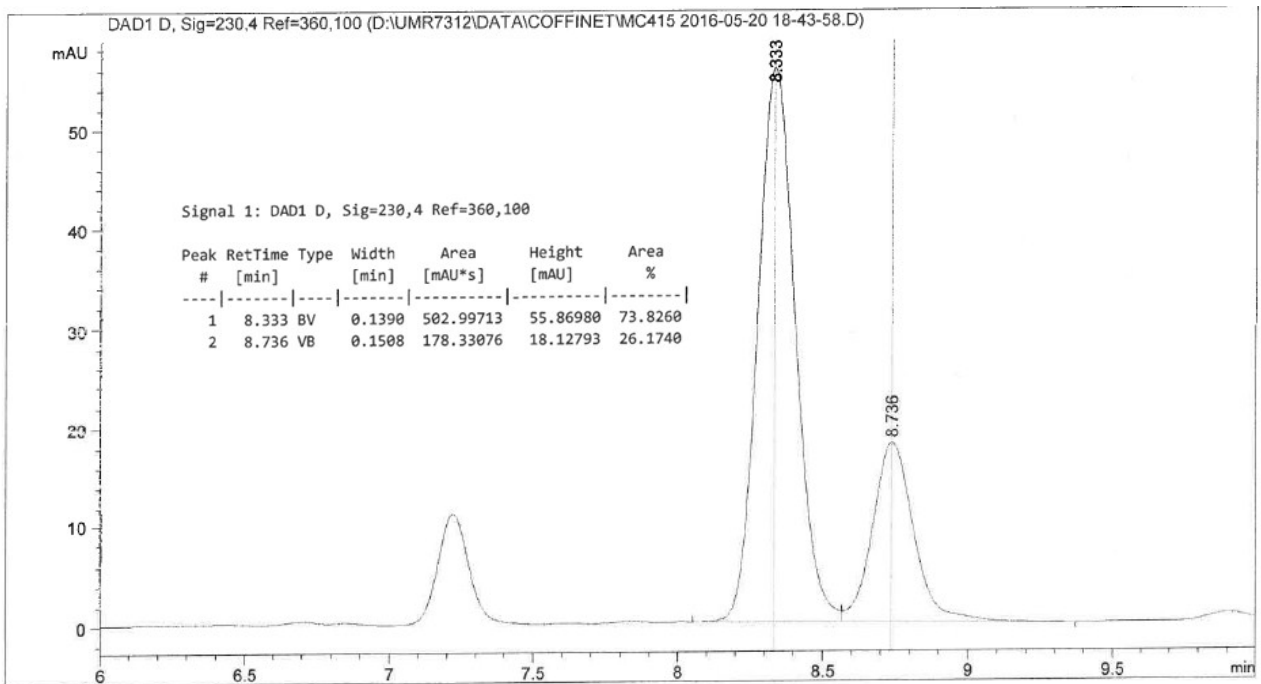

(R)-[(S)-Cyclohex-2-en-1-yl](phenyl)methanol 3a

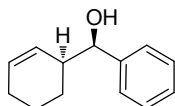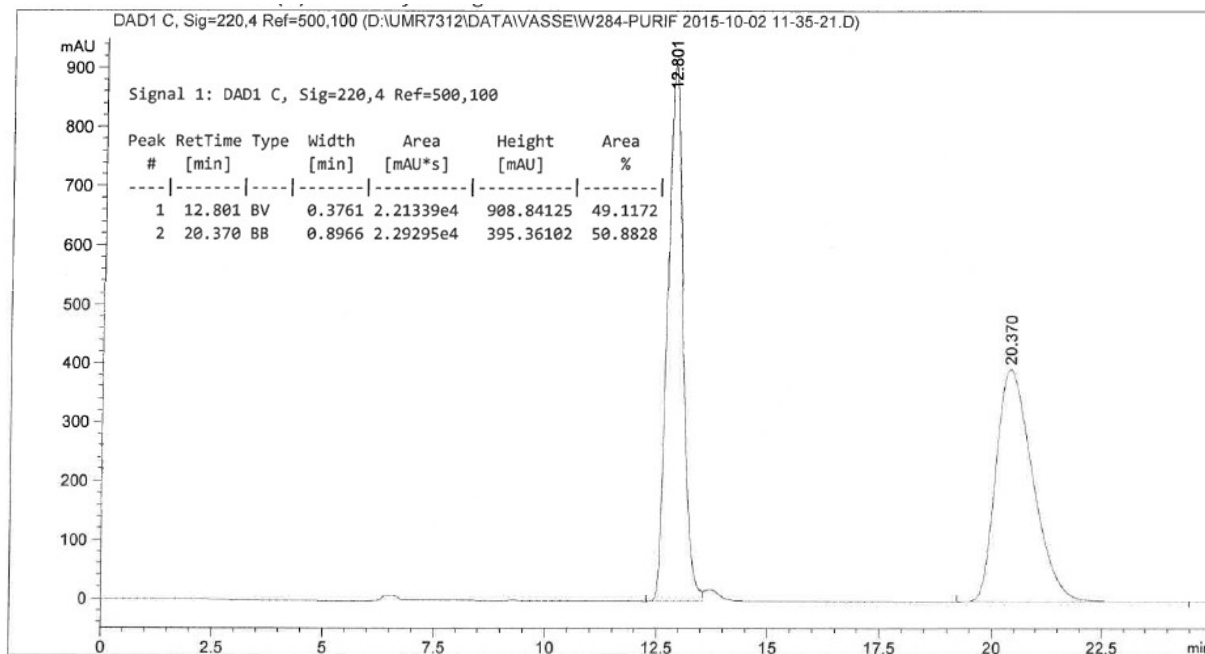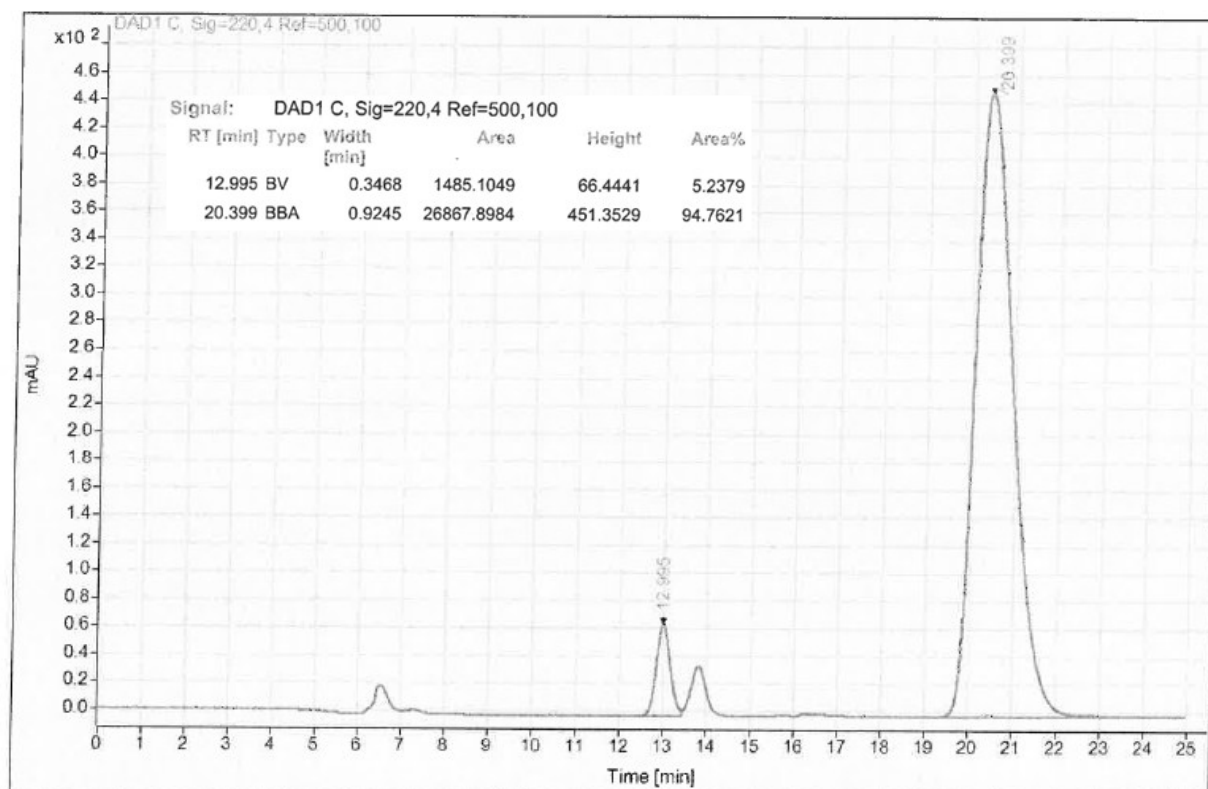

**(R)-(4-Bromophenyl) [(S)-cyclohex-2-en-1-yl]methanol 3b**



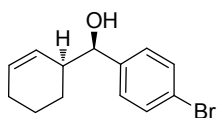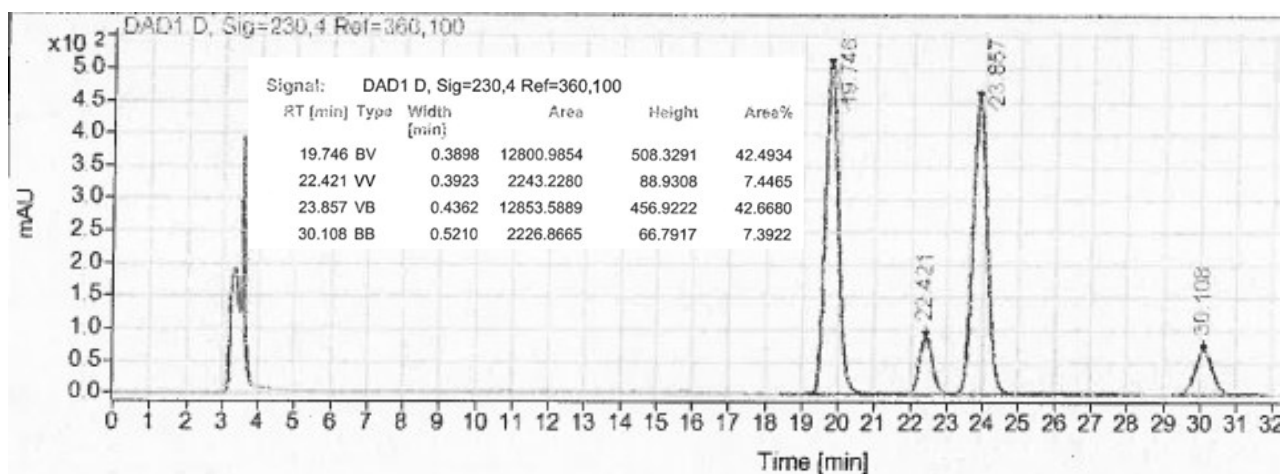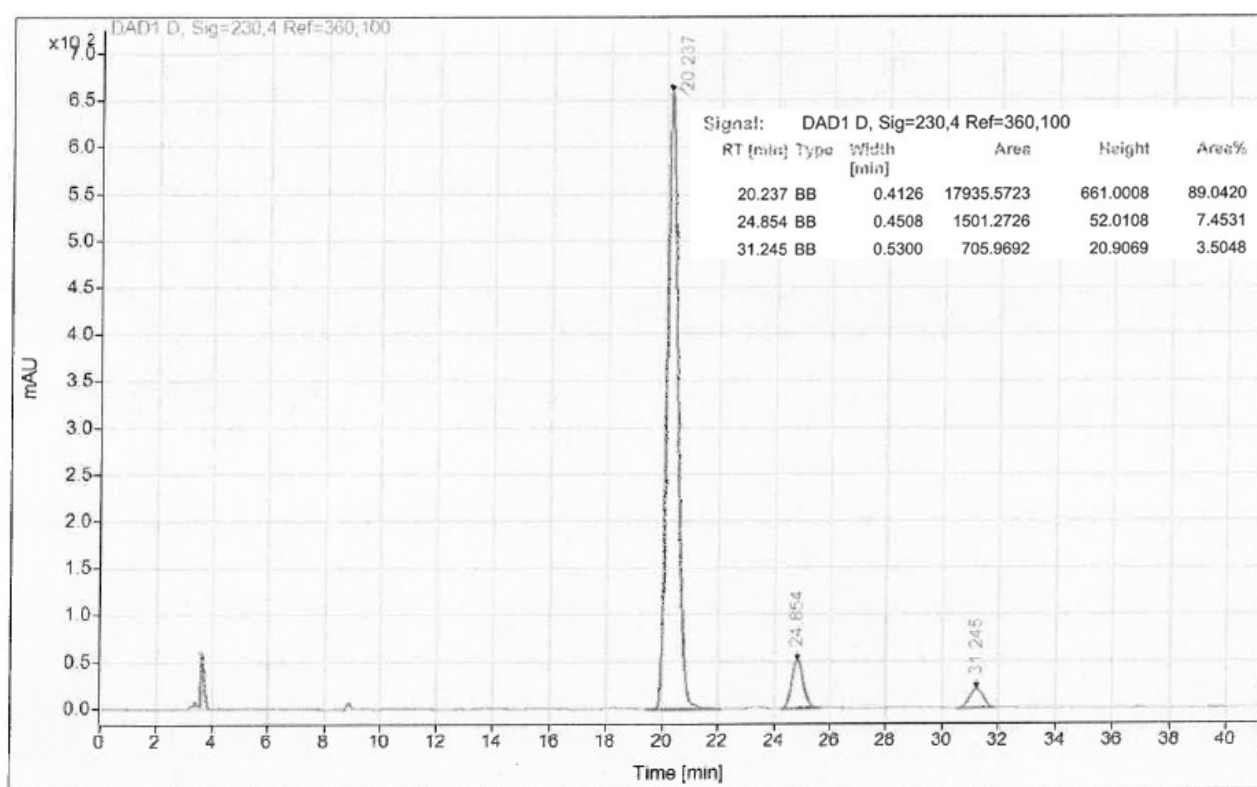

(R)- [(S)-Cyclohex-2-en-1-yl](3,4-dichlorophenyl)methanol 3c

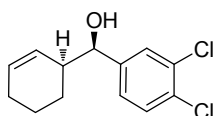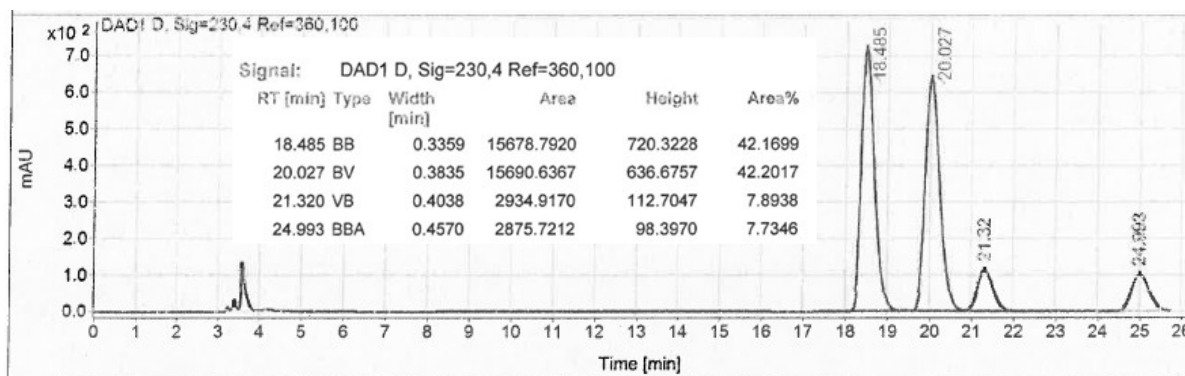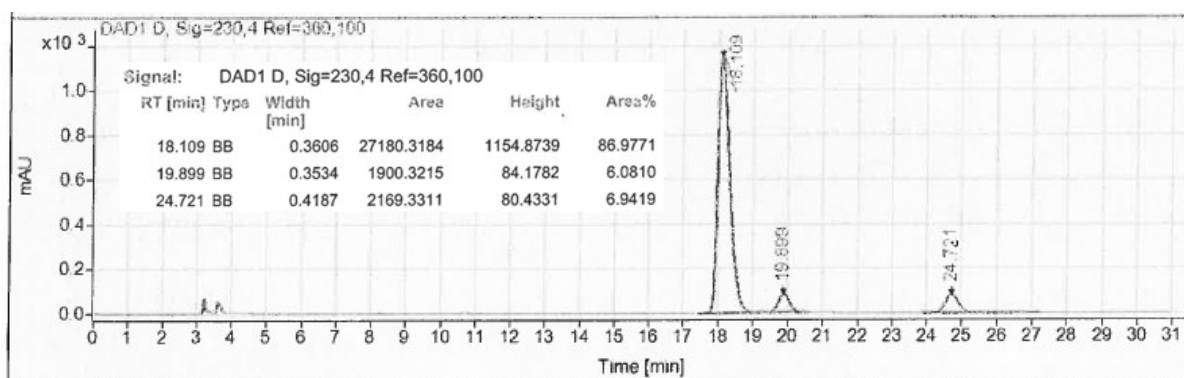

**(R)-(6-Bromobenzo[d][1,3]dioxol-5-yl)[(S)-cyclohex-2-en-1-yl]methanol 3d**

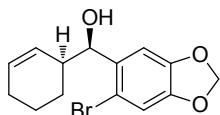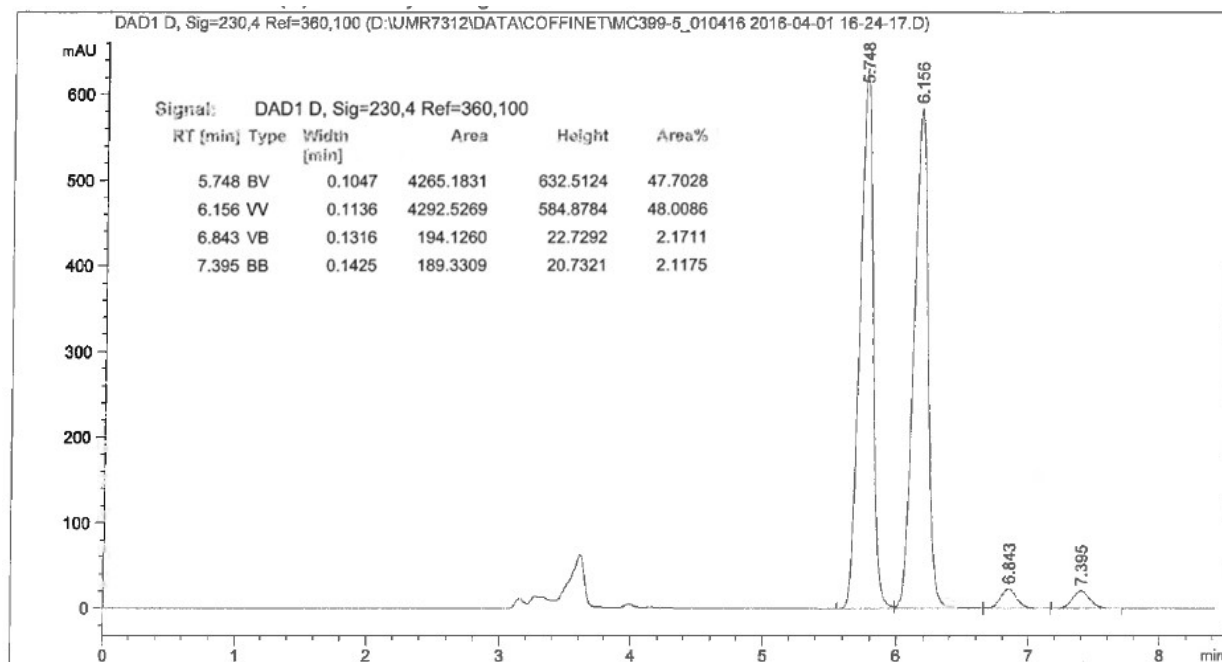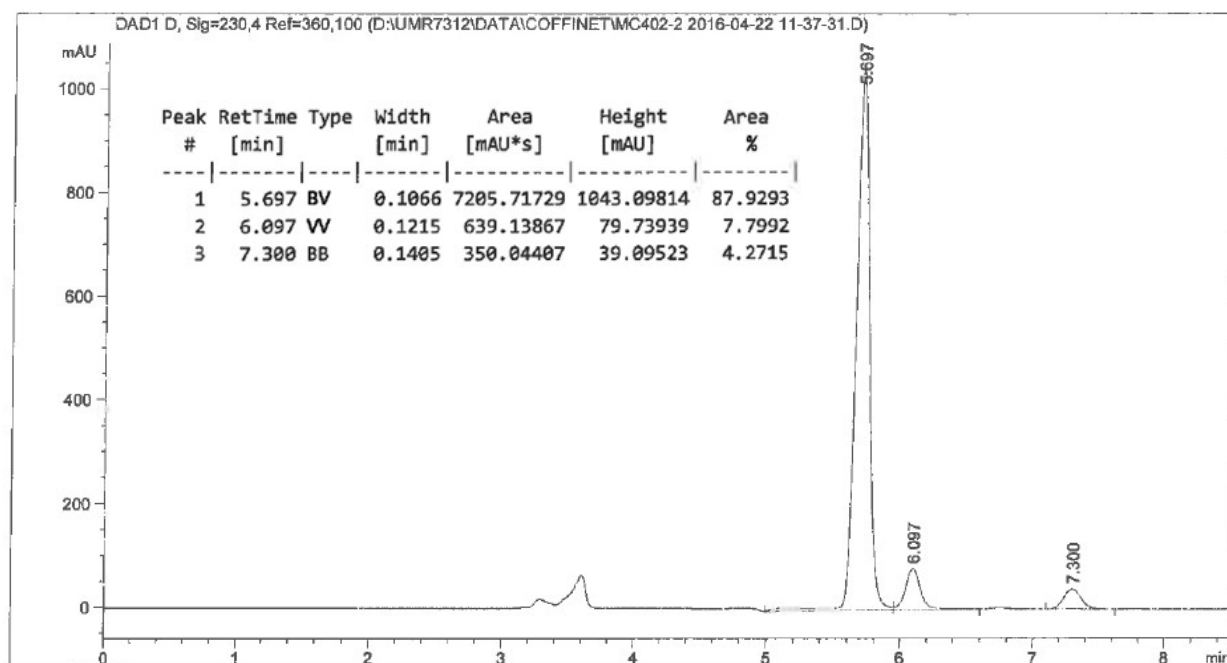

Methyl 4-[(*R*)-[(*S*)-cyclohex-2-en-1-yl](hydroxy)methyl]benzoate 3e

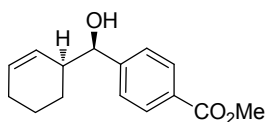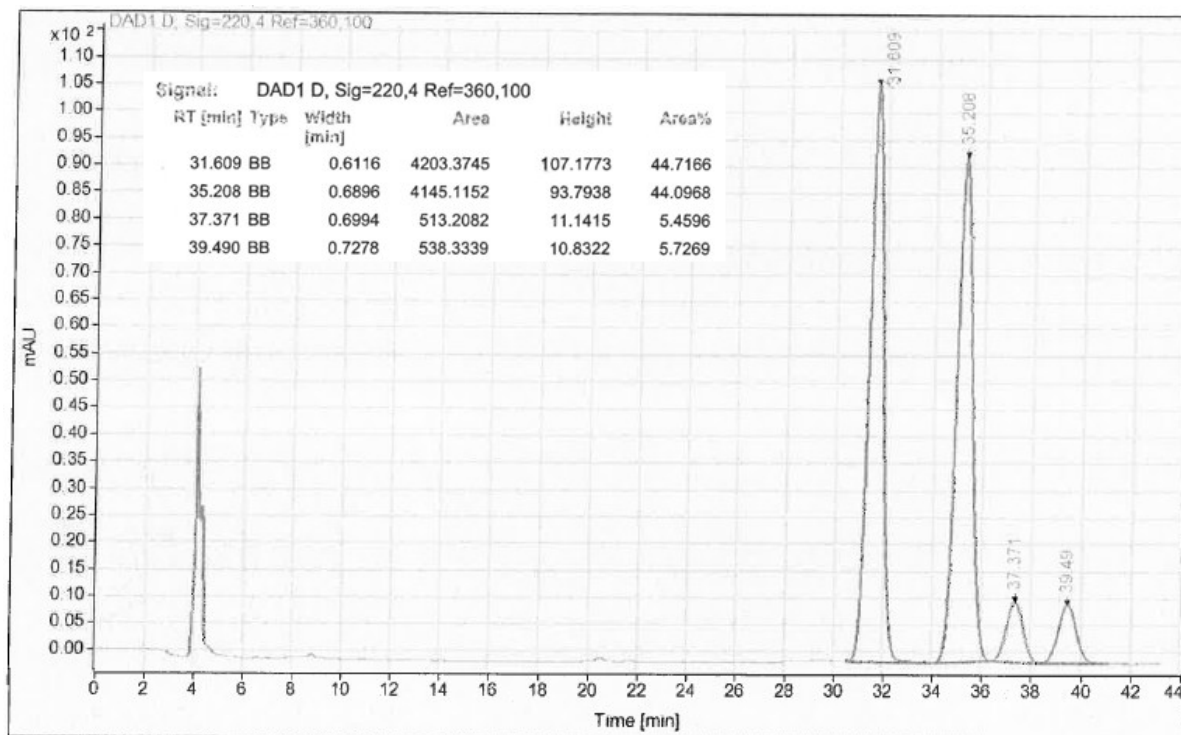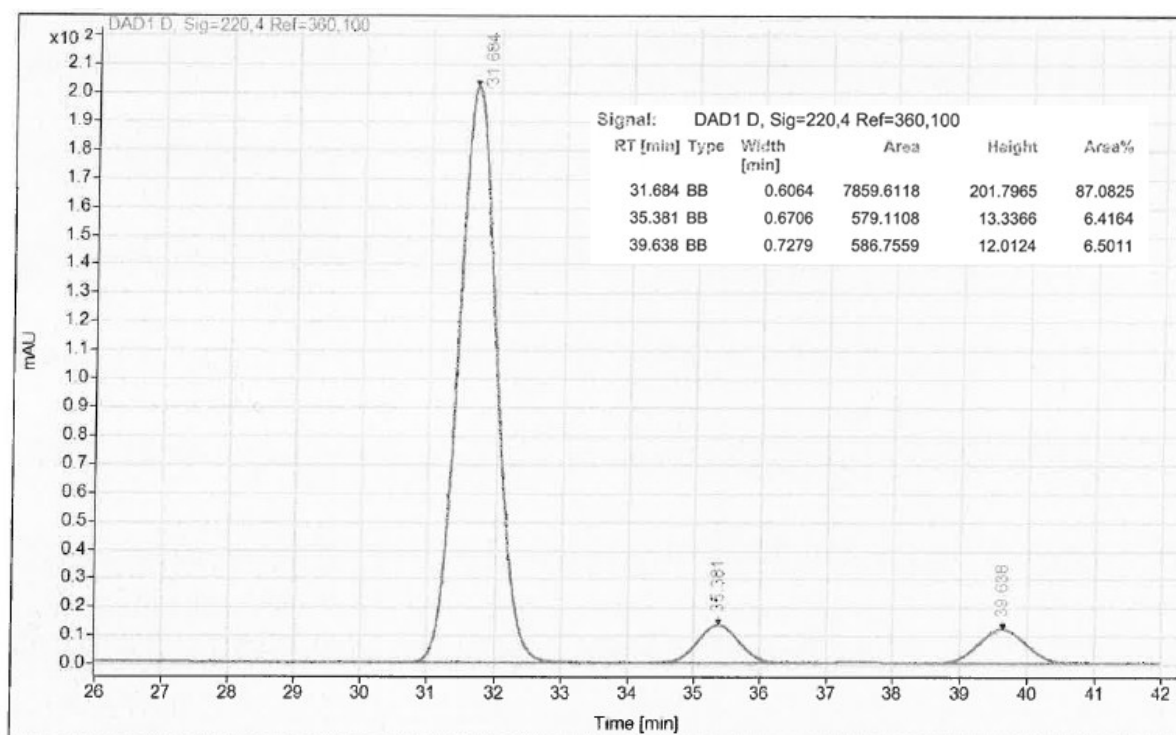

(R)- [(S)-Cyclohex-2-en-1-yl](pyridin-3-yl)methanol 3f

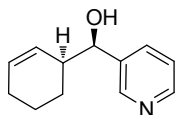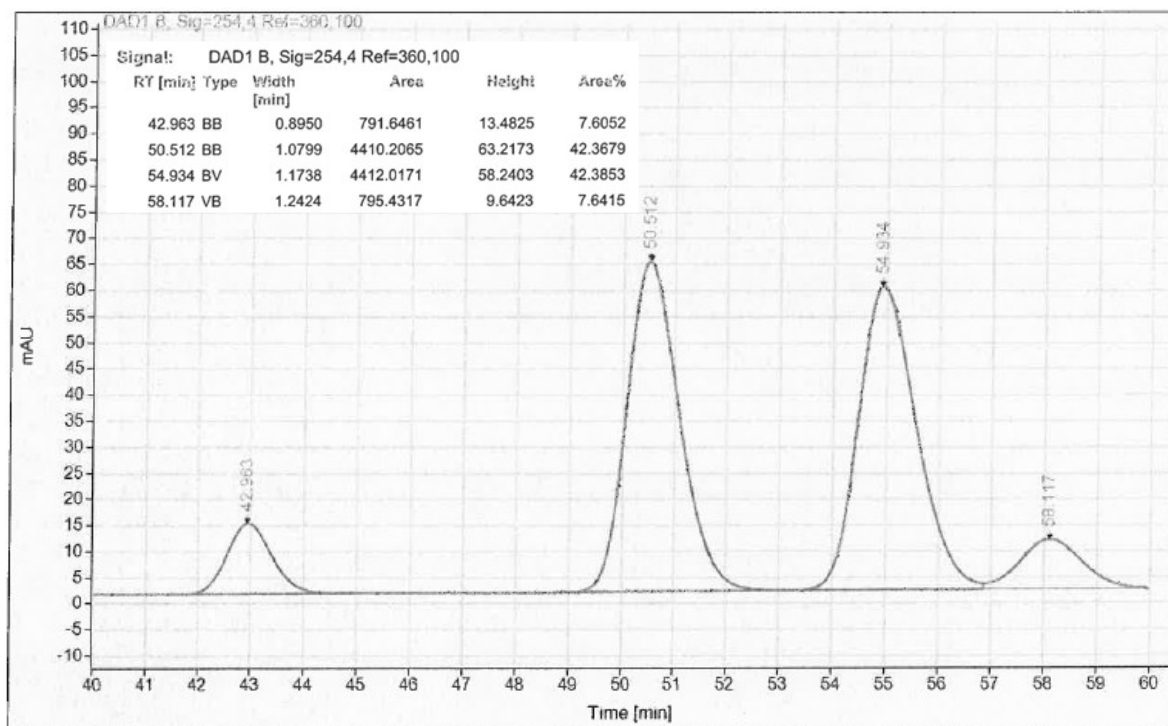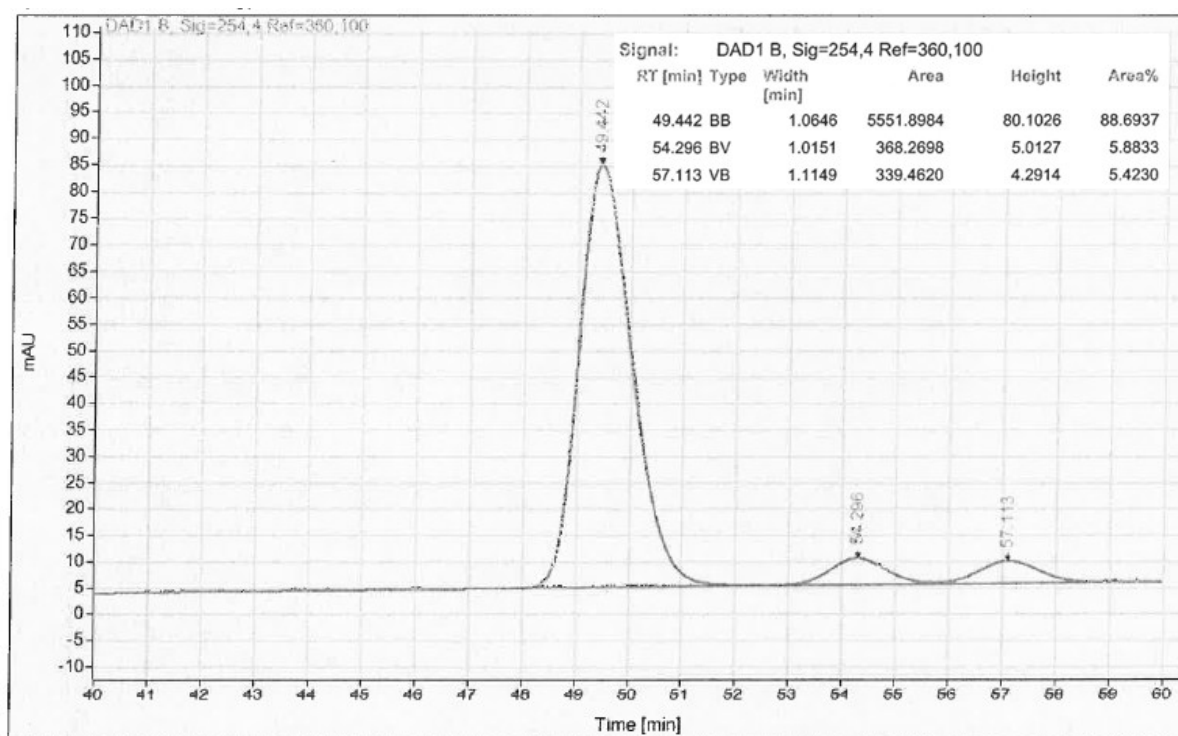

(R)- [(S)-Cyclohex-2-en-1-yl](furan-3-yl)methanol 3g

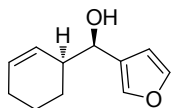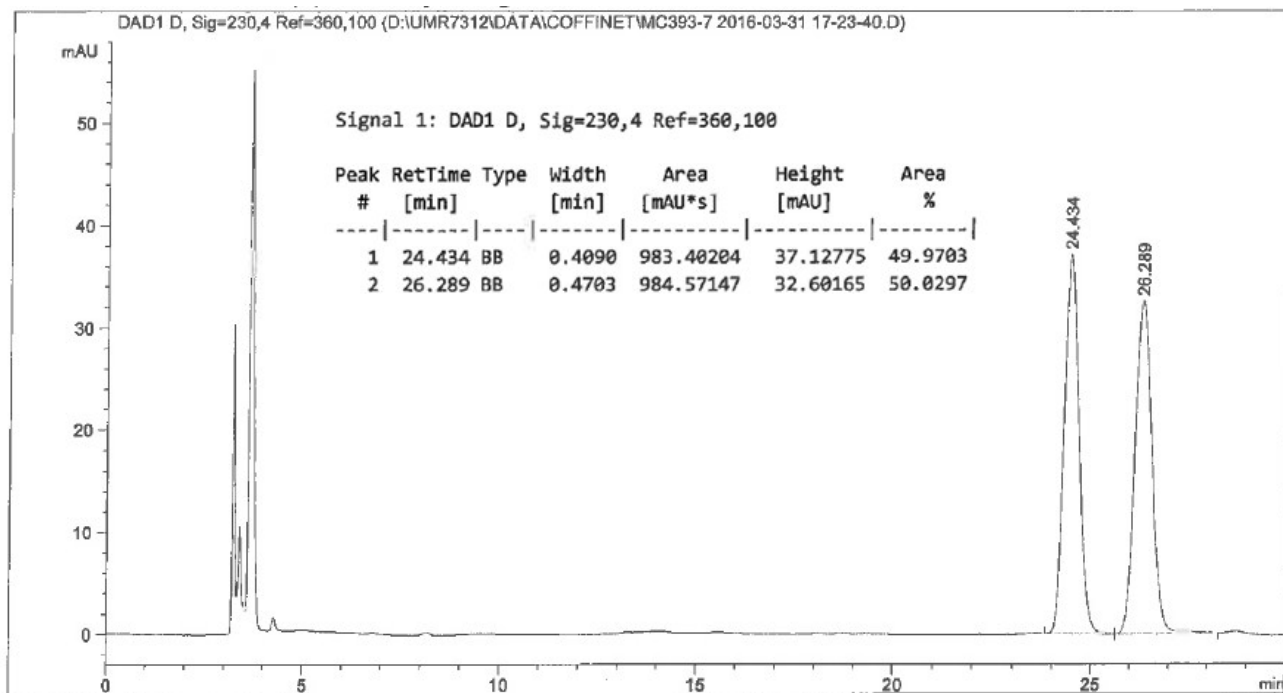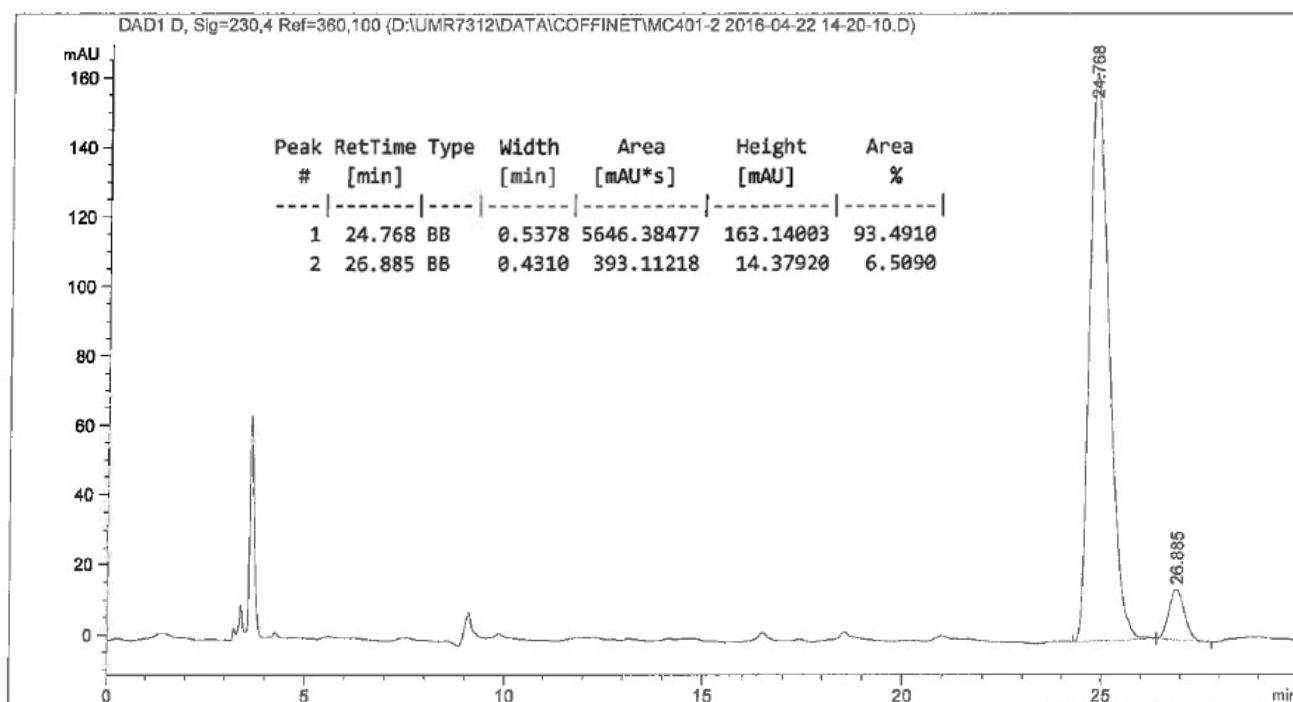

(R)- [(S)-Cyclohex-2-en-1-yl](1H-indol-2-yl)methanol 3h

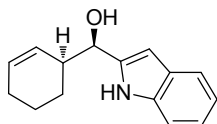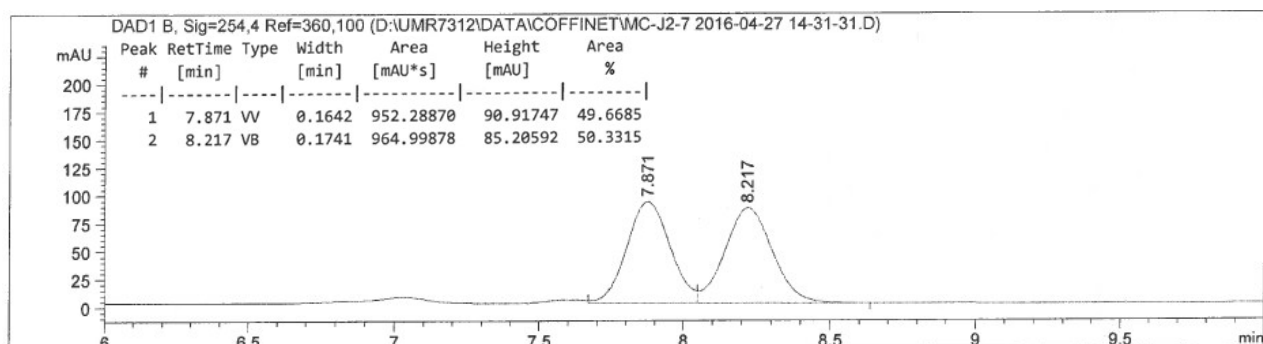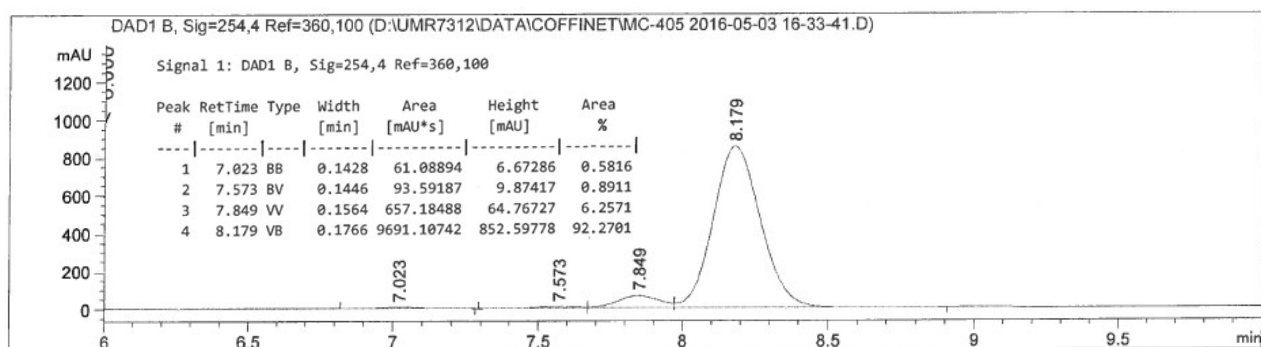

(*S,E*)-1-[(*S*)-Cyclohex-2-en-1-yl]-3-phenylprop-2-en-1-ol 3i

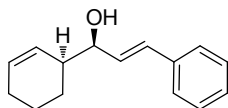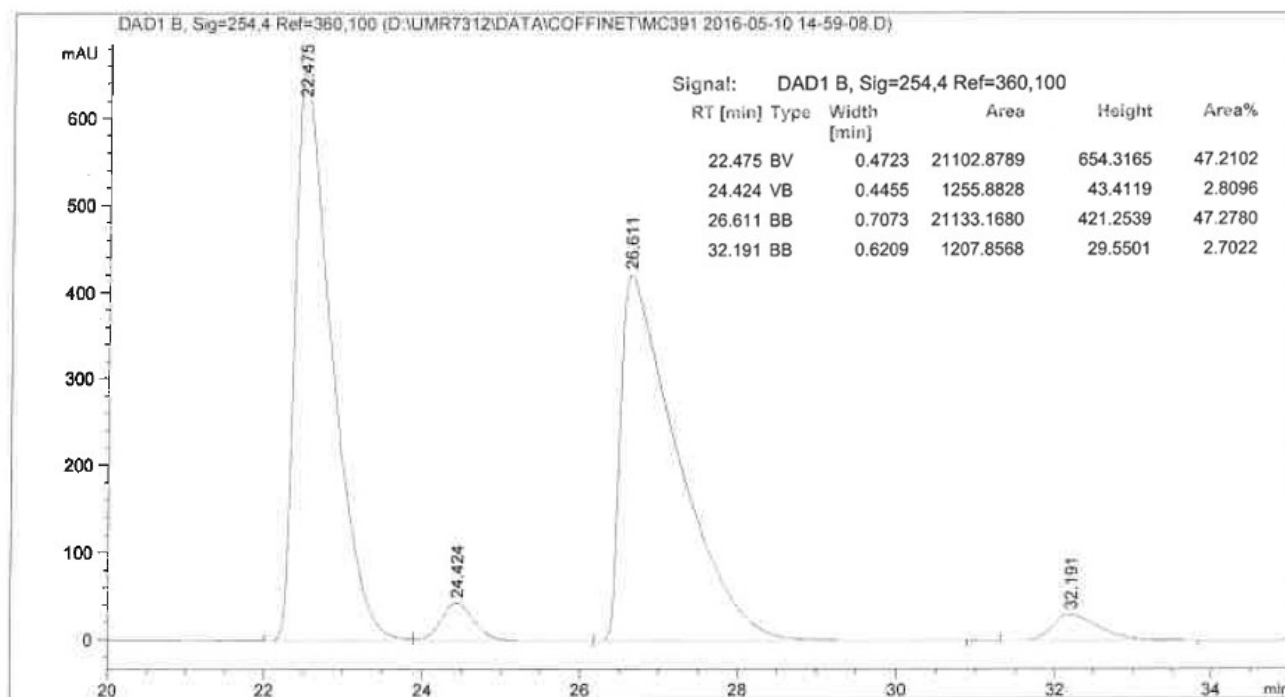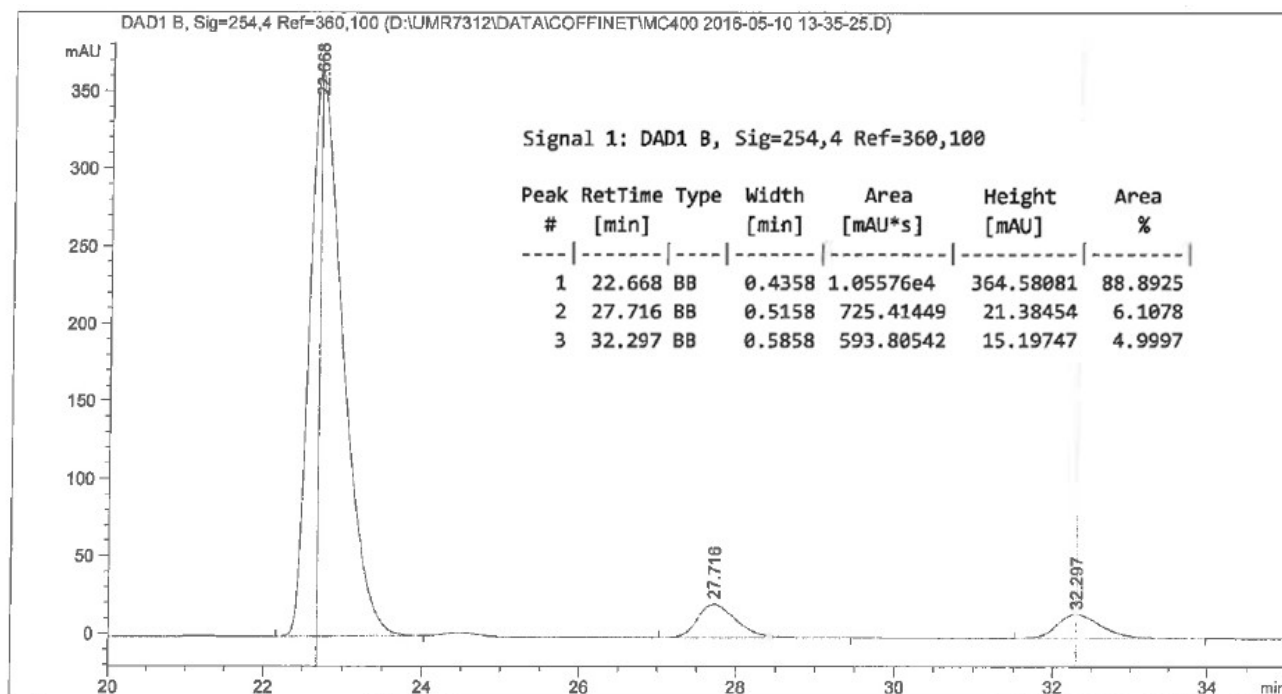

**(R)-1-[(S)-Cyclohex-2-en-1-yl]-2,2-diphenylethanol 3j**



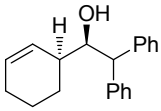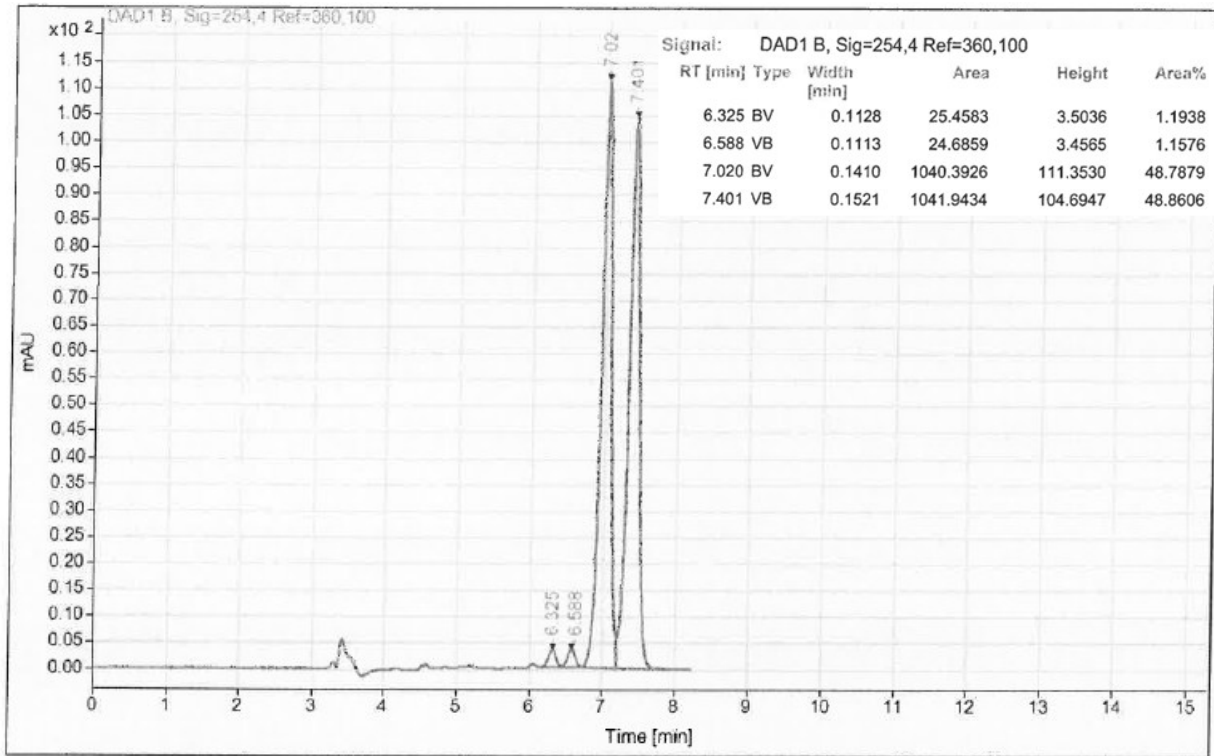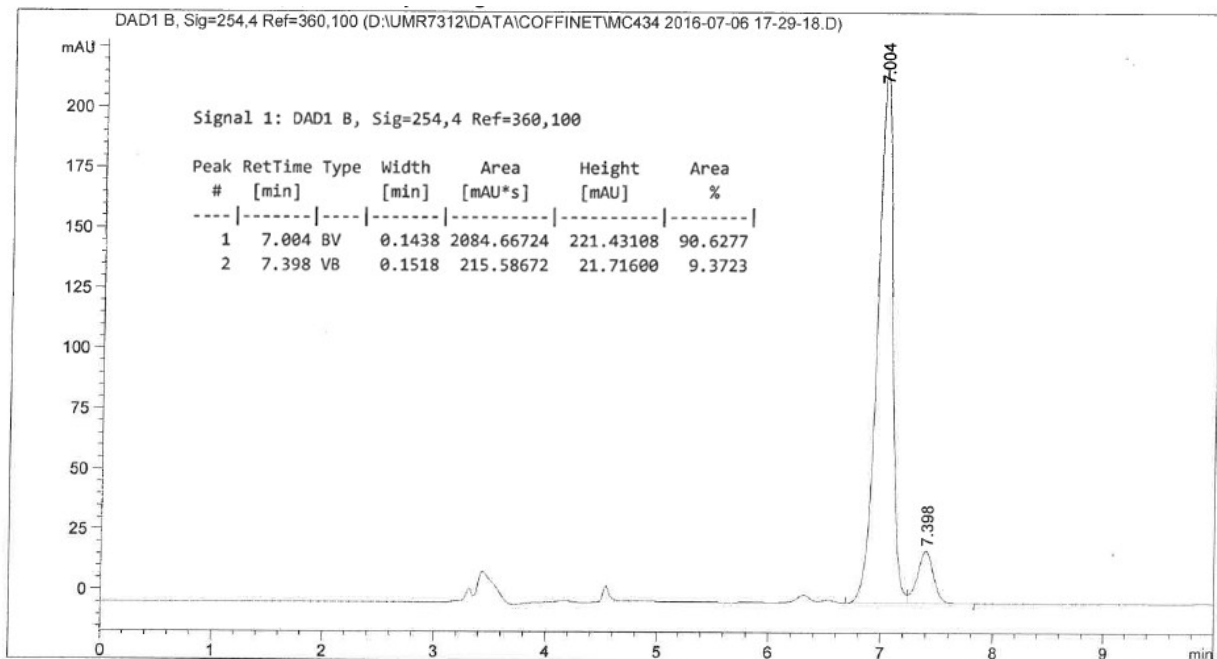

**(S)-1-[(S)-Cyclohex-2-en-1-yl]butane-1,4-diol**

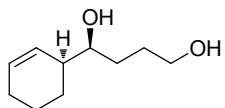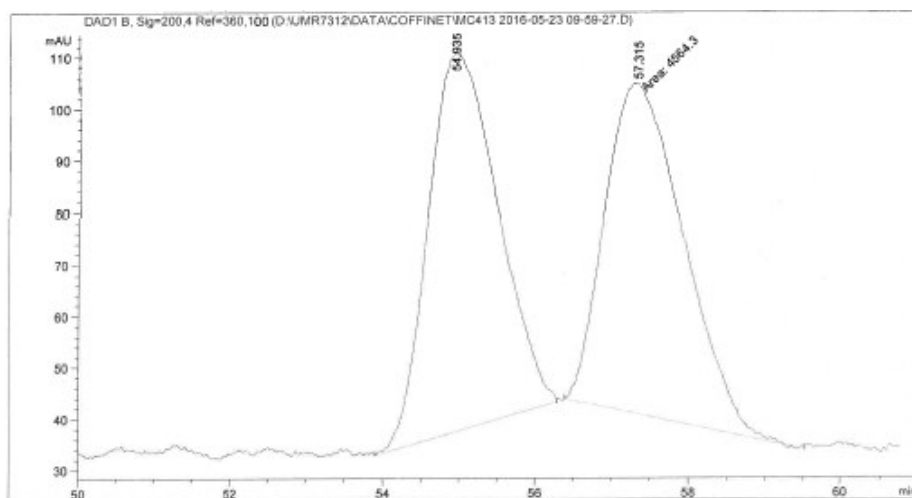

| Peak # | RetTime [min] | Type | Width [min] | Area [mAU*s] | Height [mAU] | Area %  |
|--------|---------------|------|-------------|--------------|--------------|---------|
| 1      | 54.935        | BV   | 0.7513      | 4678.54199   | 73.43497     | 50.6180 |
| 2      | 57.315        | MM T | 1.1878      | 4564.29834   | 64.04315     | 49.3820 |

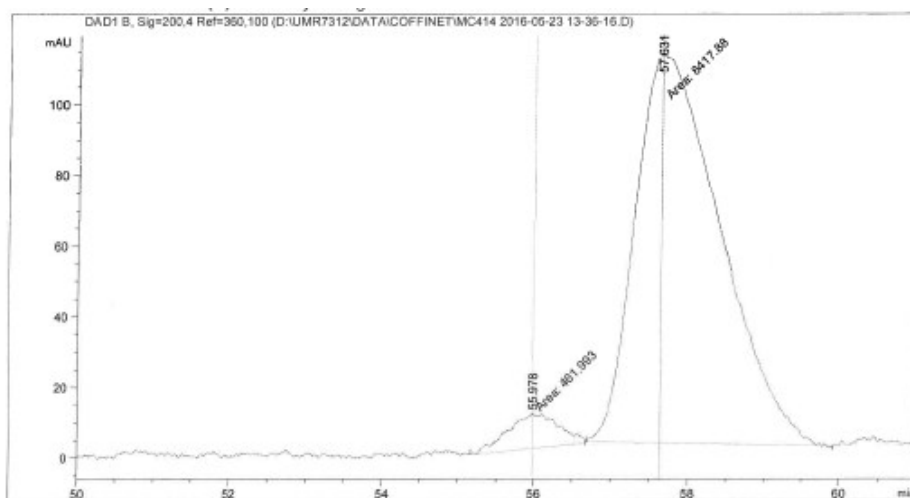

Signal 1: DAD1 B, Sig=200,4 Ref=360,100

| Peak # | RetTime [min] | Type | Width [min] | Area [mAU*s] | Height [mAU] | Area %  |
|--------|---------------|------|-------------|--------------|--------------|---------|
| 1      | 55.978        | MM T | 0.7912      | 461.99271    | 9.73145      | 5.2027  |
| 2      | 57.631        | MM T | 1.2817      | 8417.87793   | 109.46446    | 94.7973 |

**(R)-1-[(S)-Cyclohex-2-en-1-yl]-1-(o-tolyl)ethanol 3n**

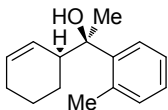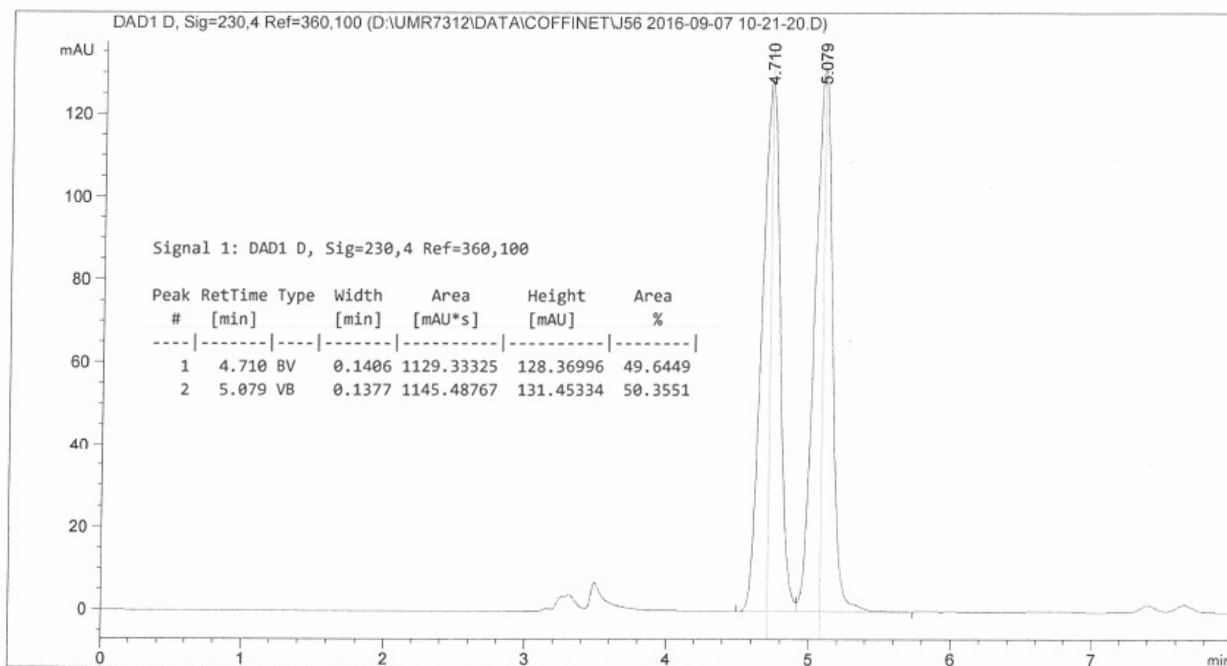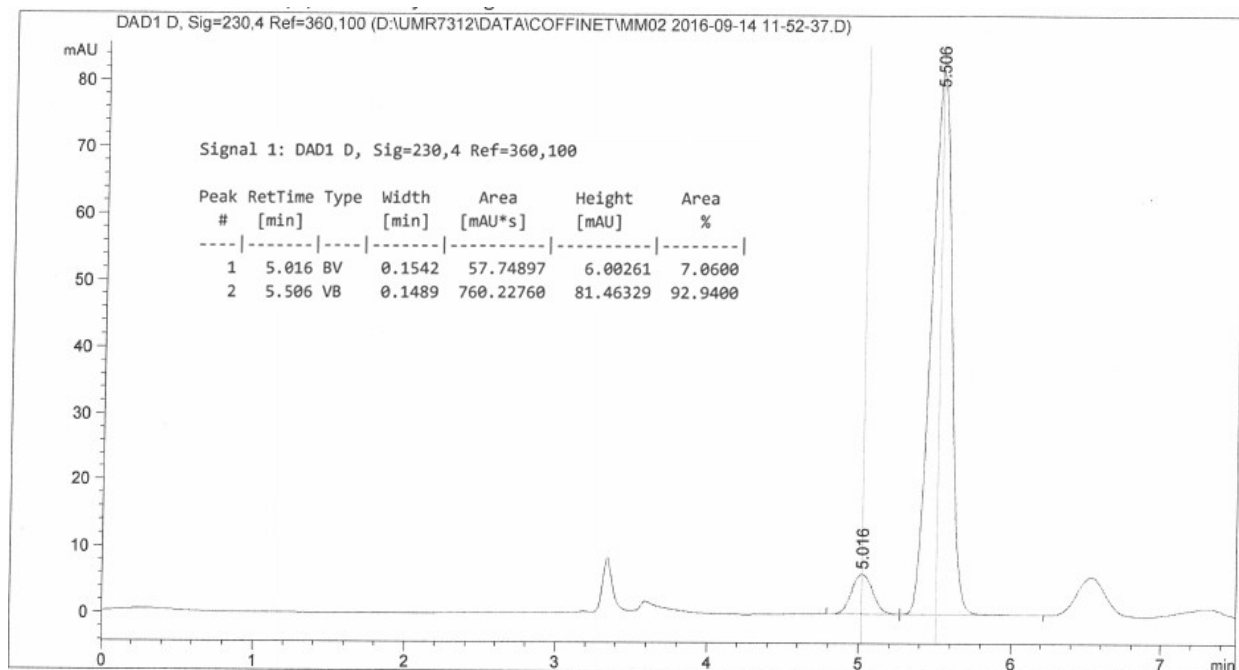

**(R)-1-[(S)-cyclohex-2-en-1-yl]-1,2,3,4-tetrahydronaphthalen-1-ol 3o**

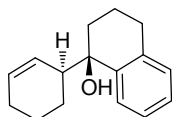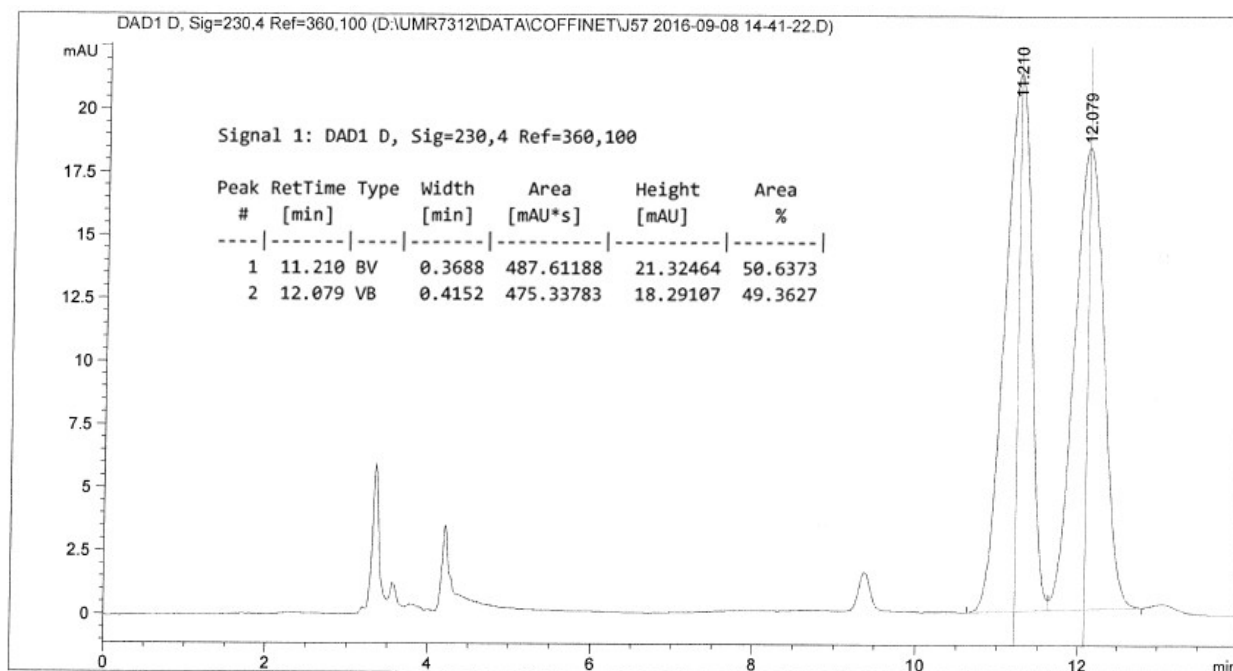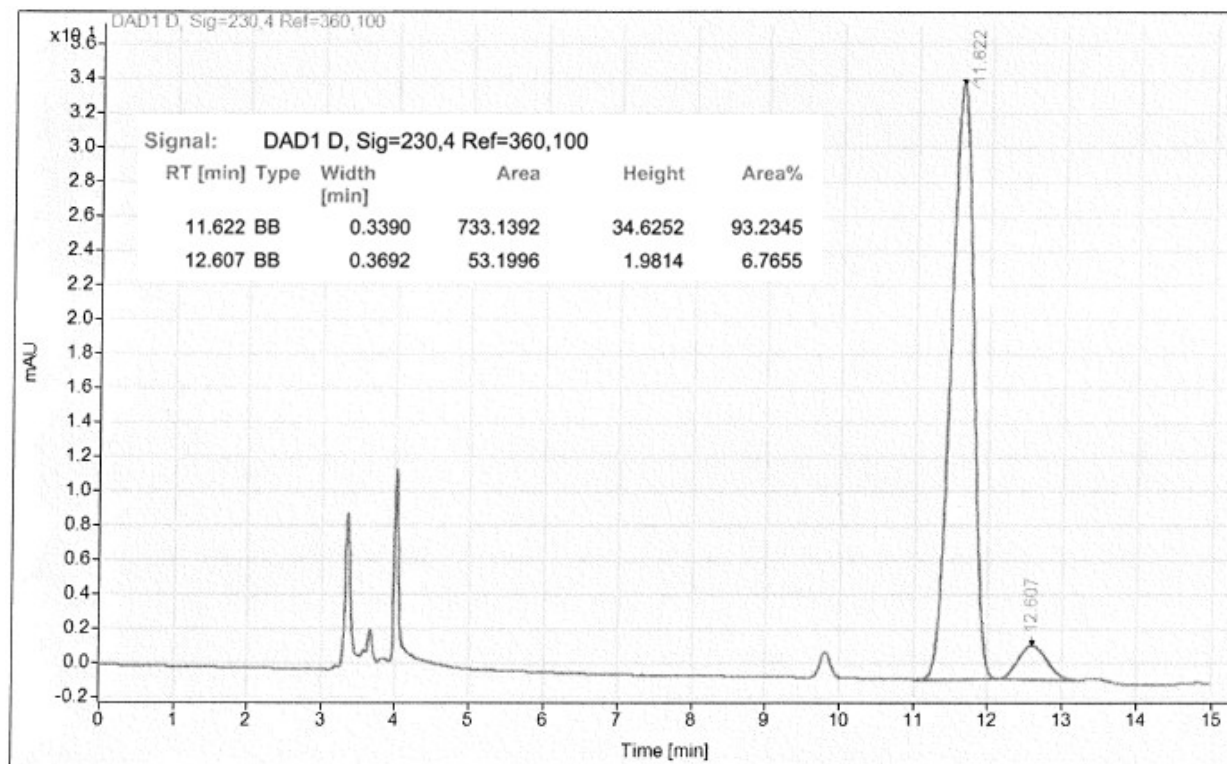

(R)-1-[(S)-cyclohex-2-en-1-yl]-1-phenyl-4-(trityloxy)but-2-yn-1-ol 3p

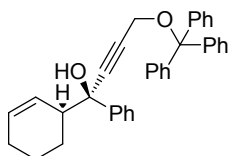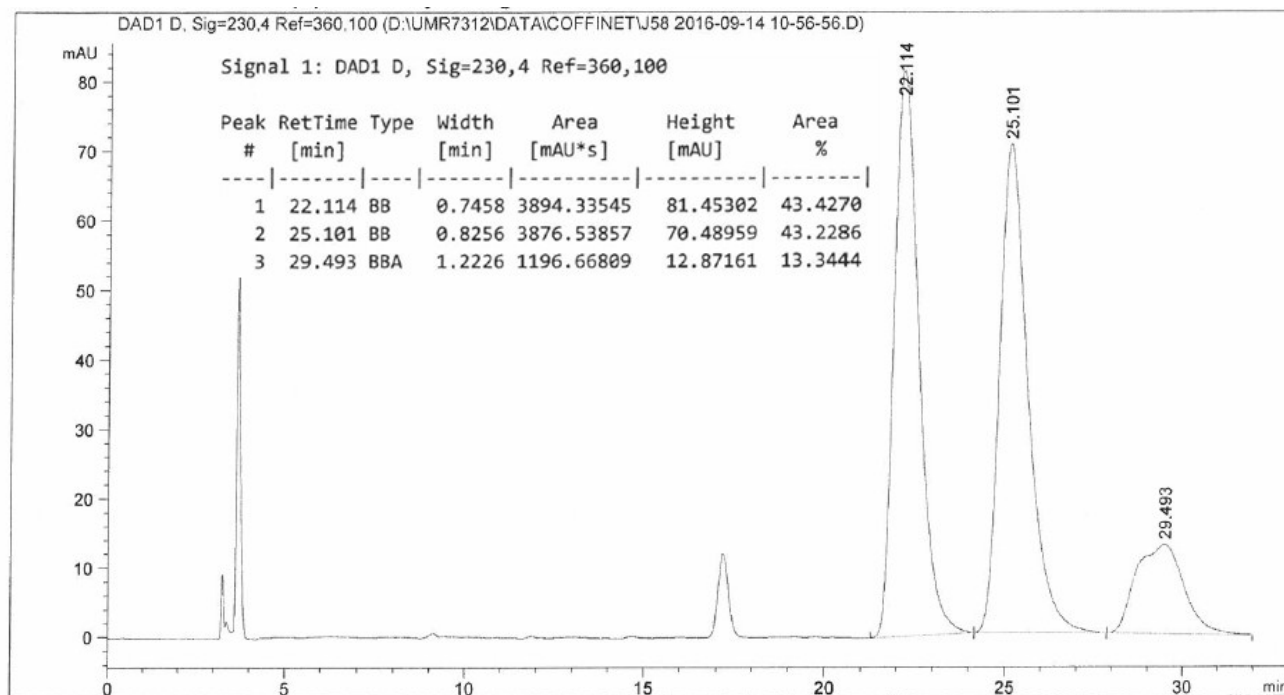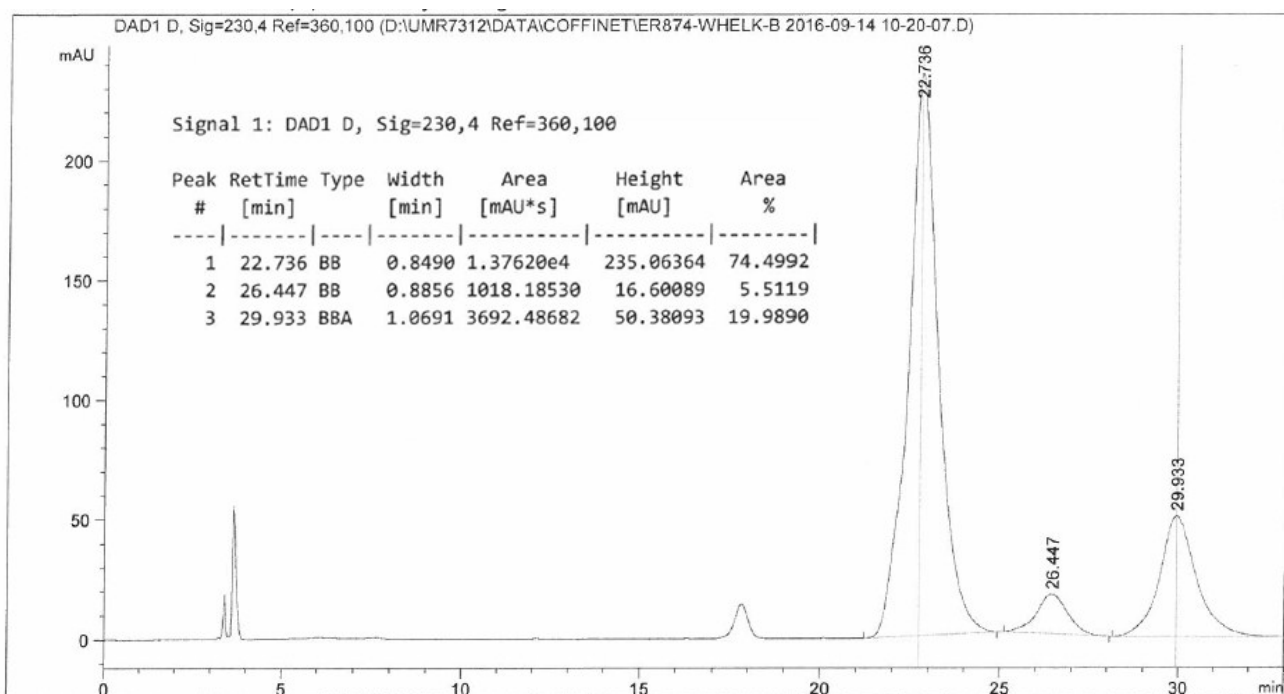

(S)-Ethyl 1',2',3',4'-tetrahydro-[1,1'-biphenyl]-4-carboxylate 5b

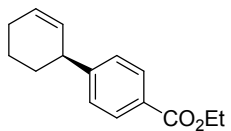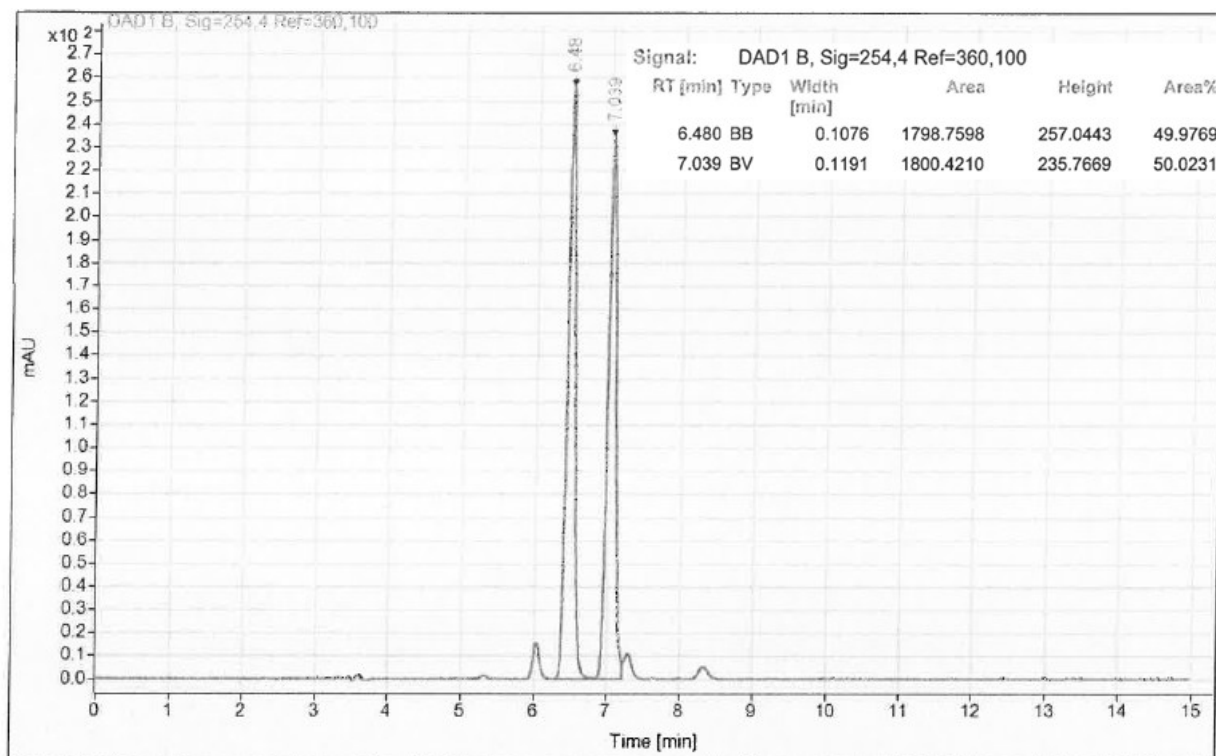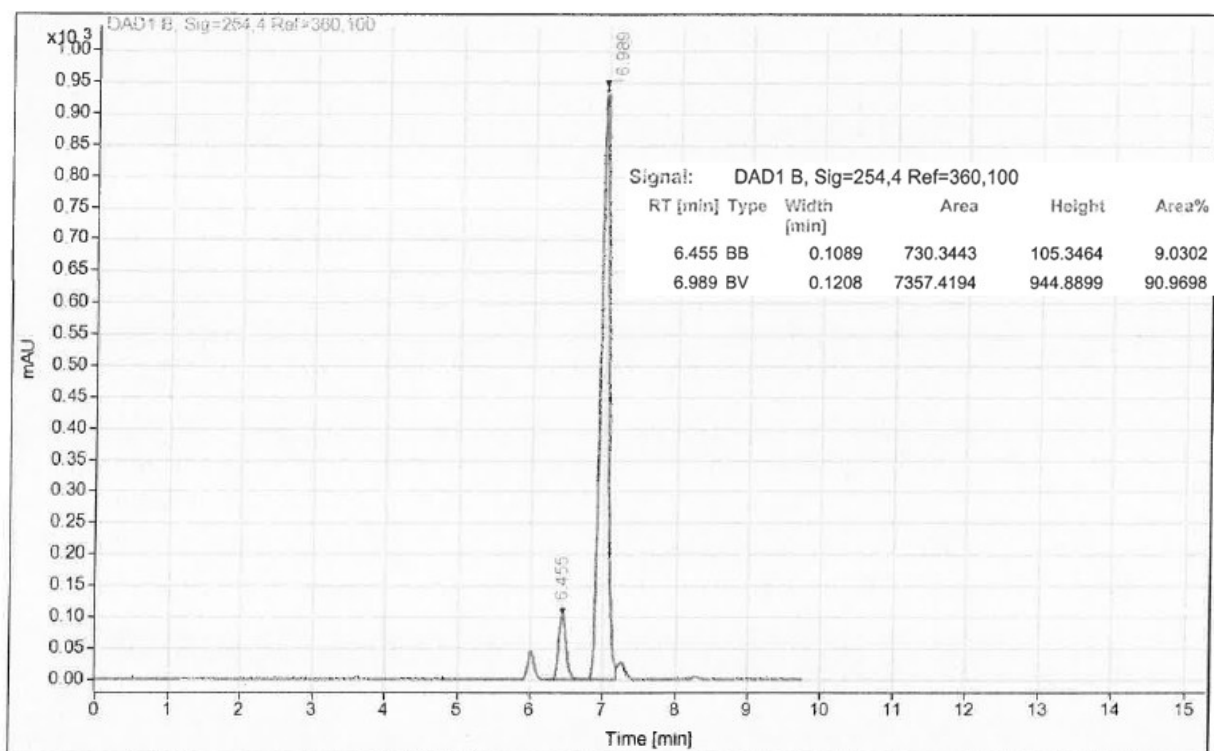

(S)-2-(Cyclohex-2-en-1-yl)pyridine 5c.

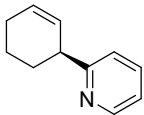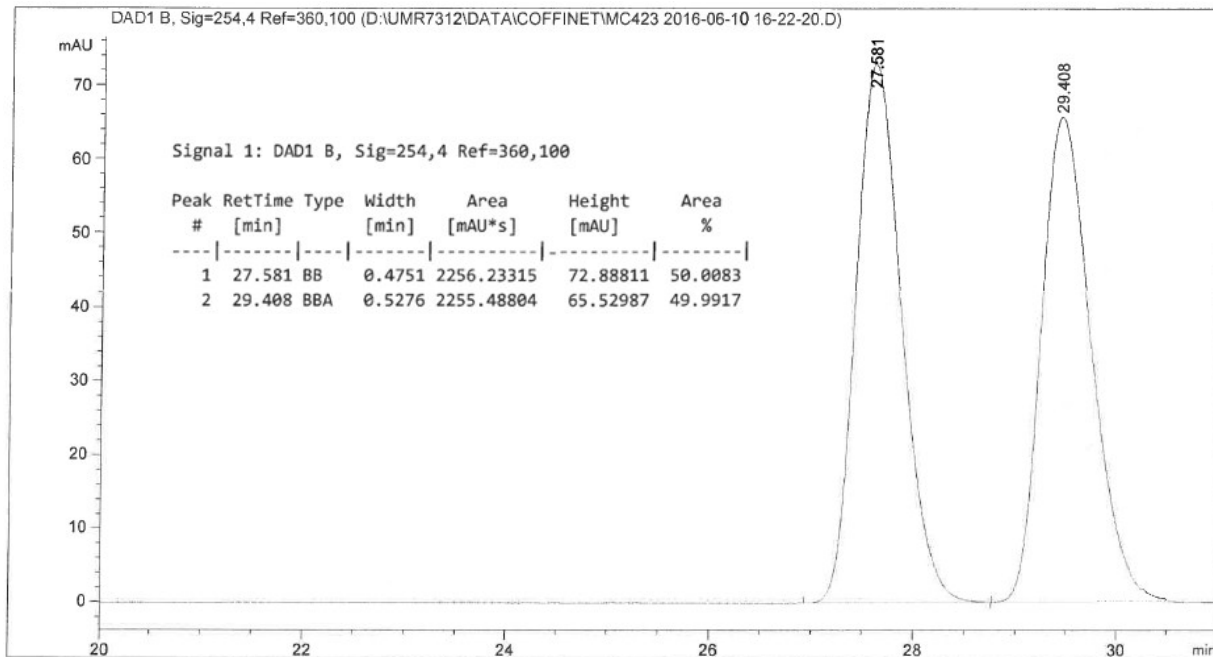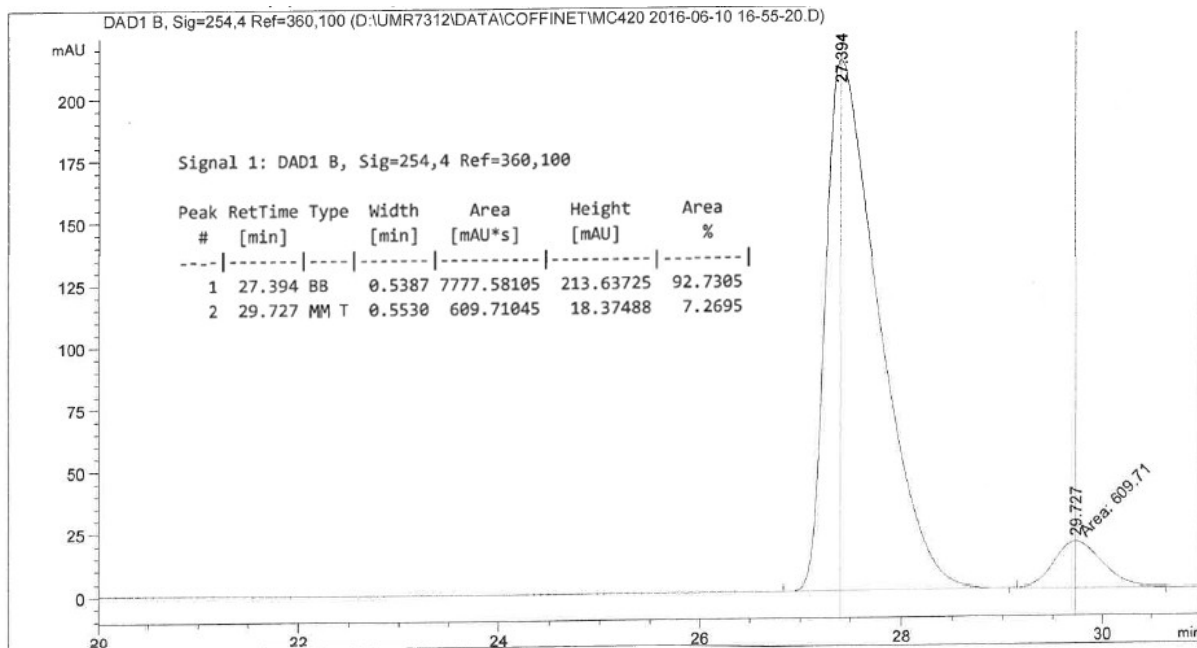

(S)-(1',2',3',4'-Tetrahydro-[1,1'-biphenyl]-2-yl)methanol 5'a

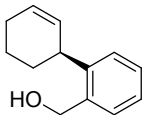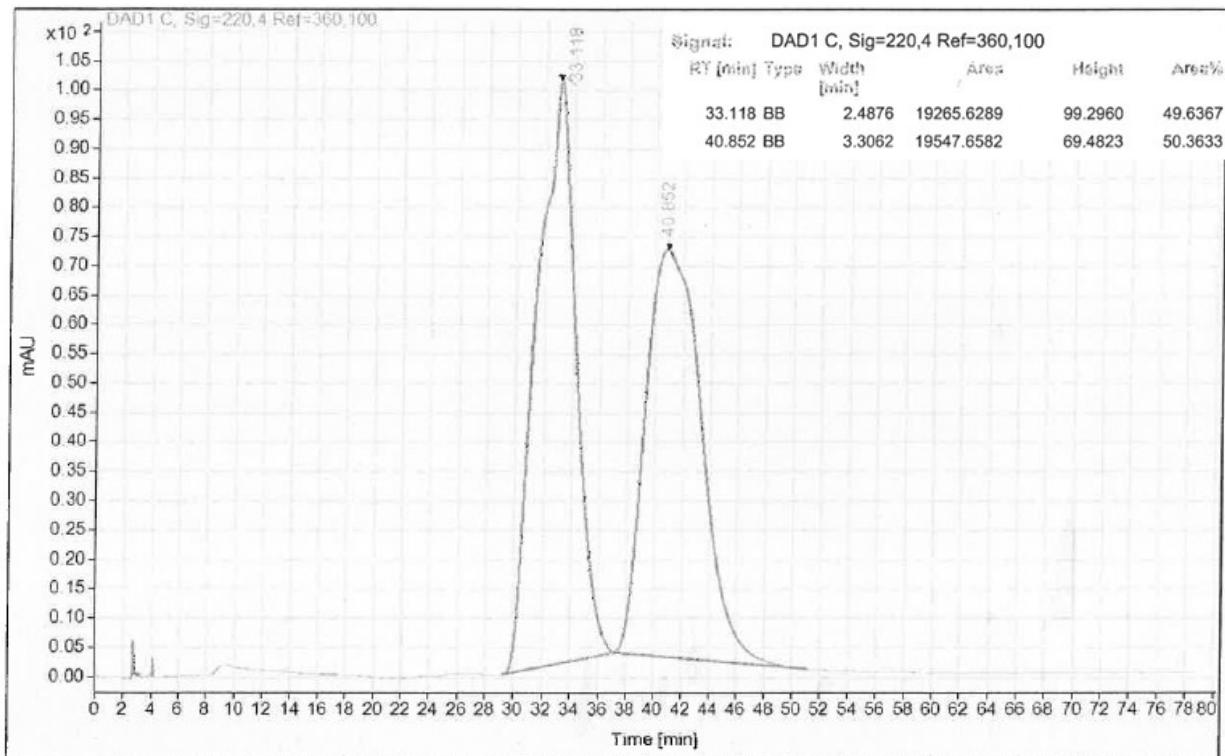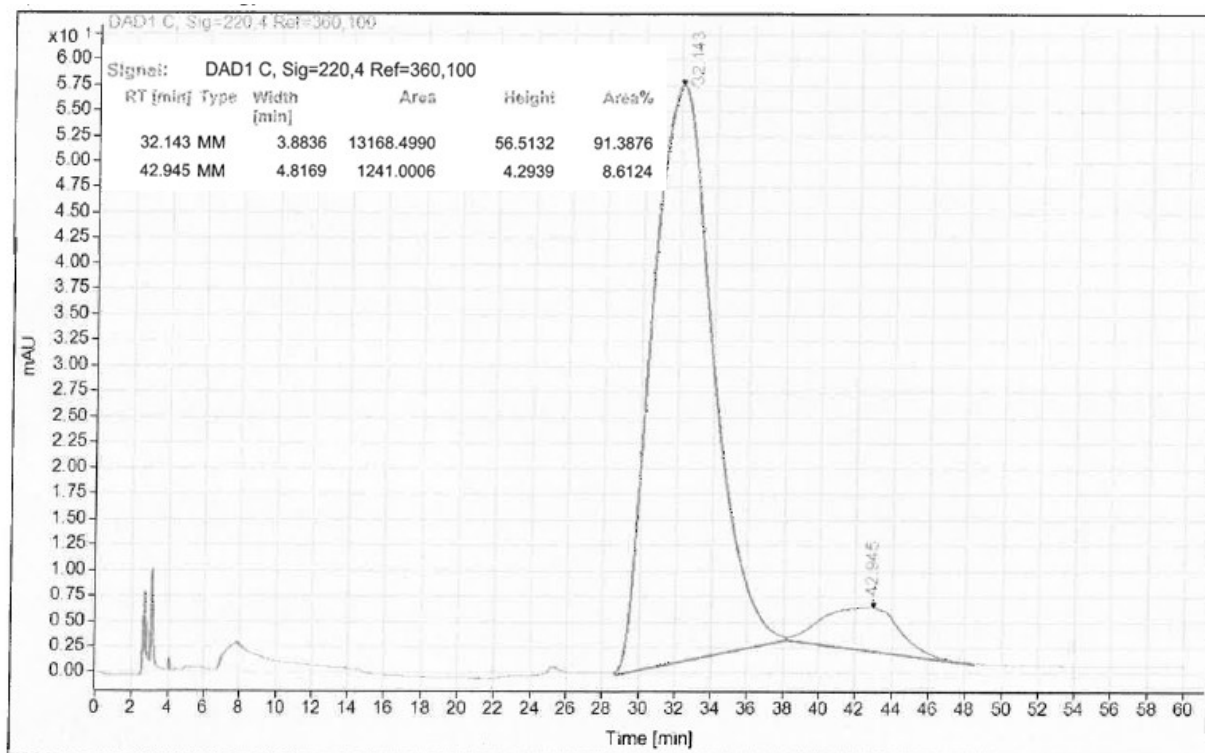

ORTEP diagram of 1''b



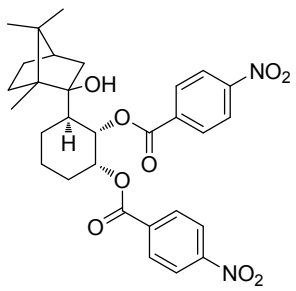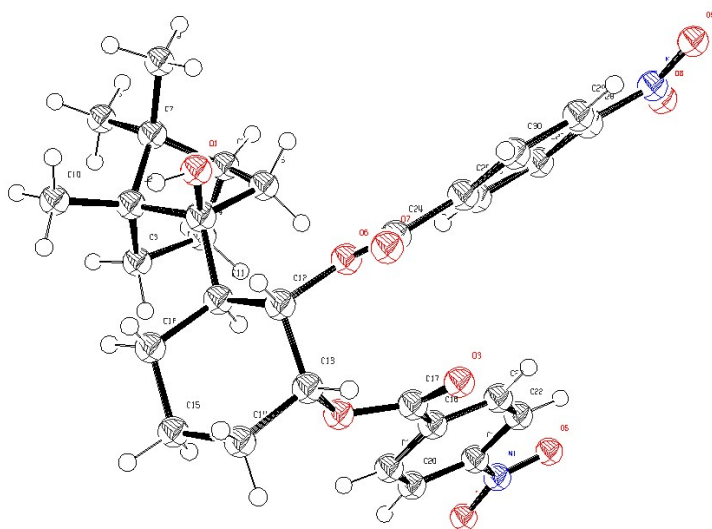

Supplement: c6cc08649g1.pdf [file c6cc08649g1.pdf]
